# Supplementary material
Source: publisher figshare collection journal article supplement (https://tandf.figshare.com/articles/dataset/_/11369025)
Supplement: Supplementary file 1 [file 1]

Archive with 12 entries (12 files):
- Supplementary Figure 1.pdf
- Supplementary Figure 2.pdf
- Supplementary Figure 3.pdf
- Supplementary Figure 4.pdf
- Supplementary Table 1  Data set.xlsx
- Supplementary Table 2.xlsx
- Supplementary Table 3.xlsx
- Supplementary Table 4.xlsx
- Supplementary Table 5.xlsx
- Supplementary Table 6 .pdf
- Supplementary Table 7.pdf
- Supplementary data - Legends of Tables and Figures.docx
