# Supplementary material
Source: publisher figshare collection journal article supplement (https://tandf.figshare.com/articles/dataset/_/11369025)
Supplement: Supplementary file 1 [file 1 › Supplementary data - Legends of Tables and Figures.docx]

**Supplementary legends of Tables and Figures**

**Supplementary Table 1 Data set**. List of public data set used.

**Supplementary Table 2**. **Genes upregulated/unaffected by cytokines treatments, in MCF7 cells**. List of the genes upregulated/unaffected by IL6, IL1b, and TNFa treatments, in MCF7 cells.

**Supplementary Table 3. Genes upregulated/unaffected by IGF treatments, in MCF7 cells.**

**Supplementary -Table 4. Genes upregulated/unaffected by TGFa treatments, in MCF10A and HepG2 cells.**

**Supplementary - Table 6**. **Transcription factors, potential binding sites at FC2 genes.** Potential binding sites were investigated using the RSATmatrix scan module (https://rsat01.biologie.ens.fr/rsat/) for potential transcription factor binding motif using the DNA sequences surrounding the TSS (TSS ±1 kb) of FC2 genes and DNA sequences surrounding the TSS (TSS ±1 kb) of FC1 genes as background.

**Supplementary - Table 7. DNA methylation and gene expression versus stromal-score.** Human breast tumors were classified in quintile (q1 to q5) according their stromal-score. DNA methylation levels (beta-values) at shore sequences of FC2 genes of the q1 class were compared with the q2 to q5 classes, (Mann Whitney test). Expression levels (FPKM values) of FC2 genes of the q1 class were compared with the q2 to q5 classes, (Mann Whitney test).

**Supplementary Figure 1. DNA methylation patterns of genes responding to TGFb, in MCF10A and HepG2.** DNA methylation density at TSS regions (TSS ± 2 kb), before exposure to TGFb, of upregulated genes (FC > 2, adjusted p_value < 0.05) or unaffected ( 0.9 < FC <1.1) was visualized by heat map constructed from 450K array for MCF10A cells and whole genome bisulfite sequencing (WGBS) HepG2 cells.

**Supplementary - Figure 2**. Number of genes with an expression level correlated (rho ≥ 0.2, adjusted p-value < 0.05) with the stromal cell content (Stroma), the expression of IL6 (IL6), or IL1b (IL1b), or TNFa, in human breast cancers (TCGA databank).

**Supplementary - Figure 3.** D**NA methylation and expression levels at shore regions** of FC2 genes, in human breast tumors classified in quintile according to their stromal score.

**Supplementary - Figure 4.** Distribution of the rho values (spearman test) of the correlation between the DNA methylation levels of FC2 genes and the stromal score, in human breast tumors (TCGA databank).
