# Supplementary material
Source: publisher figshare collection journal article supplement (https://tandf.figshare.com/articles/dataset/_/11369025)
Supplement: Supplementary file 1 [file 1 › Supplementary Figure 3.pdf]

FC2 genes - Mean DNA methylation at shore regions

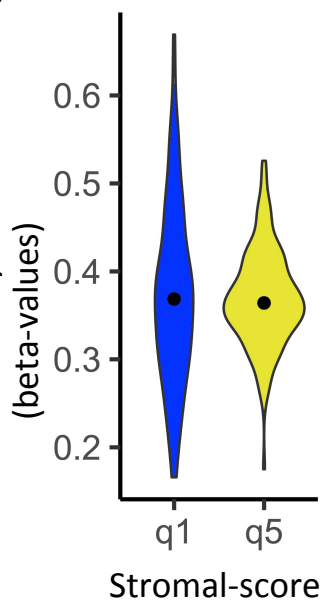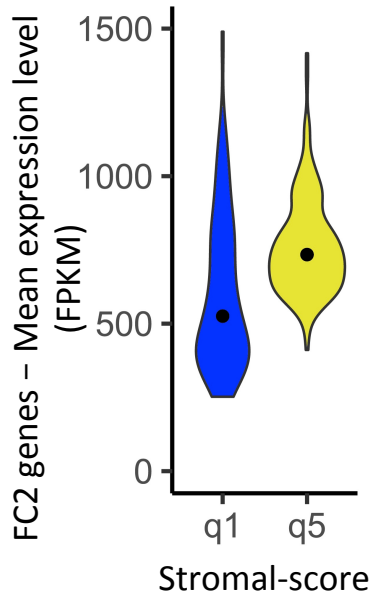

q1 = first quantile  
low Stromal-score

q5 = fifth quantile  
high Stromal-score

Supplementary.Figure.3
