# Supplementary material
Source: publisher figshare collection journal article supplement (https://tandf.figshare.com/articles/dataset/_/11369025)
Supplement: Supplementary file 1 [file 1 › Supplementary Table 1 Data set.xlsx]

## Sheet: Feuil1
DATA	REFERENCE	ANALYSIS
MCF7 cells treated for 4 days with IL6	GSE54329	Analyzed with GE02R
MCF7 cells treated for 45 min with IL1b	GSE67295	Analyzed with Cuffdiff
MCF7 cells treated for 3 h with TNFa	GSE67295	Analyzed with Cuffdif
MCF7 cells treated for 24 h with IGF	GSE7561	Analyzed with GE02R
MCF10A treated for 3 days h with TGFb	GSE28569	Analyzed with GE02R
HepG2 treated with TGFb 4 days	GSE127828	R/Bioconductor package lum
Wole genone bisulfite sequencing MCF7	GSE54693	GSM1328112_methdens_hg19_50bp_win.bw
Histone marks and DNase	UCSC	big.wig format
DNA methylation 450K array for MCF7	ENCODE, http://hgdownload.soe.ucsc.edu/goldenPath/hg19/encodeDCC/wgEncodeHaibMethyl450/
DNA methylation 450K array for MCF10A	GSM2080306	beta-values
DNA methyaltion HepG2	GSM2308631	big.wig format
ESTIMATE score	bioinformatics.mdanderson.org/estimate
