# Supplementary material
Source: publisher figshare collection journal article supplement (https://tandf.figshare.com/articles/dataset/_/11369025)
Supplement: Supplementary file 1 [file 1 › Supplementary Table 2.xlsx]

## Sheet: Feuil1
Genes upregulated by IL6	Genes unaffected by IL6		Genes upregulated by IL1b	Genes unafected by IL1b		Genes upregulated by TNFa	Genes unaffected by TNFa		Pool of the the upregulated genes	Pool of the genes unaffected by at least 2 cytokines
ABCG1	IFI6		BIRC3	ZNF185		IL32	TRIM52		IL32	STAT1
ACHE	STAT1		SLC5A5	MINPP1		CD83	RAB6A		CD83	AKT1
ACSF2	OAS1		EGR2	ABI1		STK17B	SCAMP5		STK17B	IRF9
ADHFE1	OAS3		C3	PIGQ		MFHAS1	AIFM1		MFHAS1	MYH14
ADORA2B	SNORA63		TNFAIP2	AIFM1		TRIP10	UBE2K		TRIP10	SLC38A2
AMACR	UBE2L6		C2CD4A	ZNF213		KLF4	UBE2L6		KLF4	GTF2I
ANGPTL6	MAZ		ADRA2A	ZNF37A		TTYH2	FIBP		TTYH2	NAPA
AQR	AKT1		MMP12	FIBP		TIFA	EBAG9		TIFA	STAT2
ARL14	IRF9		CYP2S1	EBAG9		PGLYRP2	AURKB		PGLYRP2	DBNDD1
B3GNT4	SNORA4		NPTX1	PTTG1		CD74	PTTG1		CD74	LSM14B
BCL9	MYD88		MMP13	ZNF235		NAV2	ATP6V1F		NAV2	ACTR2
CABP4	SEMA3C		IGF2	SOCS6		ATF3	SOCS6		ATF3	DDX6
CALHM3	SLC39A1		DDX60L	ROGDI		IFNAR2	LAMTOR3		IFNAR2	GPNMB
CCDC122	ZFP36L1		IFIT2	HMGN3		SMOX	TRAPPC13		SMOX	KDM2A
CD37	CBX6		CACNG8	COPS2		GJB2	MED14		GJB2	OAZ2
CES3	MYH14		CXCL14	TRIP13		CDR1	CYTH3		CDR1	RHBDF1
CLEC3B	TRIM25		PTAFR	IGFLR1		CTSS	ATPAF1		CTSS	PABPC3
CLSTN3	SLC38A2		NGFR	USP45		IL15RA	TRIP11		IL15RA	PPP6R3
CPNE5	RPL34		MMP1	APRT		FLT3	TRIP12		FLT3	ATF5
CTSO	PML		LAMP3	MCAT		GBP2	APRT		GBP2	AGAP3
DCDC2B	ZNFX1		EXOC3L4	CTC1		ENC1	CHMP1A		ENC1	PDLIM7
DOCK5	GTF2I		NECAB1	PCGF5		NINJ1	MCAT		NINJ1	SEC24C
DSCAML1	MYH9		ARHGAP31	ASIC3		CD274	CTC1		CD274	RPS6KB2
DUSP15	NAPA		GBP1	POLD1		PLAUR	RHNO1		PLAUR	MYO5C
EIF5AL1	THBS1		CX3CL1	DIP2A-IT1		RHBDF2	PCGF5		RHBDF2	INTS1
ELFN2	STAT2		IRAK2	CTPS1		B3GNT2	CIB2		B3GNT2	STXBP2
EPO	TMEM259		IL32	ARHGDIA		LYRM4	KIF18B		LYRM4	PRPF31
EPX	SPSB3		MICAL2	KIF18B		PTPRE	POLD3		PTPRE	MOSPD3
F2RL1	ILVBL		CLEC2D	FN3KRP		RASSF3	TXNDC12		RASSF3	TAF6
FAM151B	DBNDD1		GLIPR2	POLD3		NFKBIB	GALK2		NFKBIB	TAF1C
FAM69B	DDX3X		PTPRE	TXNDC12		LAMB3	PLAGL1		LAMB3	MATR3
FAM71E1	RAB11B		CPLX2	POLD4		VDR	FAM177A1		VDR	JMJD8
FKBP10	LSM14B		FLT3	FAM169A		SLC35G1	TFDP2		SLC35G1	SNX12
FKBP1A	ZBTB42		PHOSPHO1	PLAGL1		ANKRD33B	DIS3L2		ANKRD33B	SLC39A9
GALR2	PACS1		FAM84A	MIPEPP3		NKX3-1	FKBP14		NKX3-1	ZNF512B
GBP2	ESR1		LRRC8C	FAM177A1		NOP16	CEP41		NOP16	ZNF524
GLI3	PCSK1N		FOSL1	TFDP2		URB2	AP1G1		URB2	MED25
GMFG	ACTR2		WNT5A	SLC9A1		TP53	AP2B1		TP53	PURB
GNMT	SCRN1		BDKRB2	DIS3L2		RAPGEFL1	MYEF2		RAPGEFL1	ZER1
GNRHR2	SAMHD1		PMAIP1	AP1G1		SDCBP	TM9SF1		SDCBP	SH3BP4
GRID2IP	DDX6		UNC5B	AP2B1		KLHL5	PHLPP2		KLHL5	NCOR2
GZMA	SNORA2A		EGR3	LYRM1		RASD1	TPGS2		RASD1	SIL1
HERC1	PRMT2		NAV2	RPS29		PALLD	CHTOP		PALLD	TSPAN17
HIST1H4F	GPNMB		RASGRP1	TMEM161B		TVP23B	DCLRE1C		TVP23B	UBXN7
HIST4H4	KCNJ3		SPRY4	TM9SF1		GBP4	RMND1		GBP4	EFCAB14
HOXD10	GREB1		ADORA2A	HELLS		LRG1	AKIP1		LRG1	CPSF7
HTR2B	SLC2A1		CXADR	TPGS2		PLEKHG4B	PIGG		PLEKHG4B	VAPB
INHBA	IRF3		FZD8	TFEB		TMEM123	LRRFIP1		TMEM123	YAP1
IQCG	RHPN1		LAMC2	RMND1		NEDD9	SEC11A		NEDD9	NUP210
KAAG1	KDM2A		LIF	MEGF8		SERPINB8	MCTS1		SERPINB8	AP1G1
KISS1R	N4BP3		LAMB3	AKIP1		CACNG8	AMZ2		CACNG8	EHMT1
KRT20	ZNF687		CDC42EP3	CEP164		NFKB1	ANAPC5		NFKB1	PLOD3
KRTAP10-11	ZC3HAV1		FAM167A	BCKDK		PRRG4	DOCK7		PRRG4	NCK2
LEKR1	ORMDL3		STAT5A	KIF27		SLC25A37	RAB4A		SLC25A37	DPF2
LHX4	OAZ2		F3	PIGG		SEC14L2	STK25		SEC14L2	PSMC2
LIPH	UNK		GEM	LRRFIP1		JAK1	SH3GLB1		JAK1	SETD3
LRRC25	LRP5		DUSP6	ANAPC5		RPS6KA2	NCOR2		RPS6KA2	GOLGA3
LRRC29	TNK2		C3orf52	RAB4A		CRIM1	TDRD7		CRIM1	SYMPK
MAGEA8	PPP6R1		NCR3LG1	IGSF8		KREMEN2	TRIM13		KREMEN2	PACS2
MAPK15	ARFGAP1		AOX1	CEP76		FAM83A	N4BP2L1		FAM83A	ATG13
MUC6	CHD3		GJB2	STK25		FAM107B	MID2		FAM107B	MCRS1
MYL9	BRF1		HBEGF	SH3GLB1		MMP1	ATF7		MMP1	POFUT2
MYOM1	LENG8		MAFF	NCOR2		FBXO32	ZMYM1		FBXO32	FMR1
NAPSB	LAMA5		FOSB	TRIM13		ZDHHC14	NUP155		ZDHHC14	ARID1A
NCOA2	ALKBH5		CMAHP	MID2		TANC1	WDR5		TANC1	CRTC2
NDRG2	MRPS12		ADM	ZMYM1		AMZ1	MTRF1		AMZ1	CERS6
NKX6-2	PLEKHA4		WNT10B	AJUBA		VASH2	TRAF4		VASH2	CASC3
NNAT	RHBDF1		SERPINB8	SYK		TTC21B	RGS6		TTC21B	RDH13
NTSR2	PABPC3		GPR115	PANX2		THUMPD2	RNF14		THUMPD2	SUPT6H
NXNL1	RASSF7		IL17C	SCAMP3		MRM1	RIN1		MRM1	GPBP1
PARD6G	ST8SIA4		GFPT2	SLC18B1		TNIP1	LETMD1		TNIP1	ANAPC2
PCP4L1	PPP6R3		WNT11	RNF14		CGNL1	ZNF830		CGNL1	INSIG2
PDE9A	ATF5		SERPINE1	ADCK2		EPPK1	GADD45GIP1		EPPK1	GRK6
PIK3C3	BOK		DUSP10	ZNF830		CYLD	TSSK3		CYLD	MINK1
PIP5KL1	EPS8L2		MAMLD1	MARVELD3		TNFAIP8	TGFBRAP1		TNFAIP8	P2RX4
PLA2G4F	CBX2		FRK	GADD45GIP1		PLK2	GSKIP		PLK2	TRAPPC10
POLE2	CHPF		FMNL3	STARD13		NFKB2	SNX18		NFKB2	CDCA4
POLRMT	BRWD1		TNFAIP3	OBSCN		EXOC3L4	IFT43		EXOC3L4	NFAT5
PPM1L	UBP1		KRT16	WDR34		ATP2C2	FADS2		ATP2C2	TEAD2
PRIMA1	RELA		BPIFA4P	GNG7		RRP12	NACC1		RRP12	ATP5SL
PRRT4	ULK3		MERTK	MMAB		CXCL11	MGME1		CXCL11	GYS1
RAB33A	MAPKAPK2		SEC14L2	RECQL5		MMP9	PMPCB		MMP9	TBC1D14
RANBP6	BTBD2		HLA-DQB1	TGFBRAP1		MYO1E	H6PD		MYO1E	FAM199X
RARRES2	AGAP3		FBXO32	LARP4		ZFP36L1	CHD1L		ZFP36L1	AP1M1
RASGEF1A	MTA2		TMEM158	VPS26B		ROBO1	MED20		ROBO1	TELO2
RHEBL1	ALDH4A1		CAV1	MED8		GRB10	LDLRAD4		GRB10	POLDIP3
RND2	MKNK2		SLC16A9	EFTUD2		MAMLD1	WDTC1		MAMLD1	SGSH
RTN2	LZTS2		PGLYRP2	SLC9A3R1		PTGES	LOC100131655		PTGES	BAP1
RXRG	PDLIM7		PLA2G4C	BAG3		IL27RA	ERVK13-1		IL27RA	SMUG1
S100A4	EHD4		CSF1	H6PD		LYAR	CD151		LYAR	GMPPA
SAAL1	HPS3		FOXO1	CHD1L		SMAD3	CD81		SMAD3	RNF168
SAMD9	ENTPD6		UMODL1	RAB3D		DDX21	CDC34		DDX21	WWP2
SCGB1D2	SEC24C		NUDT4	GOSR2		DHRS3	RNF41		DHRS3	MAN2A2
SCNN1B	ZBTB7A		PLEKHA4	CHN1		B4GALT5	BNIP2		B4GALT5	ACOT8
SEMA4G	KIAA0319L		ZMYND15	MED17		FMNL3	BAX		FMNL3	MON1B
SFT2D2	SH3GL1		AP3B2	ITPRIPL2		PLAU	SDCBP2-AS1		PLAU	SS18L1
SHISA2	DNAJC12		RASD1	GLRX		ITGAV	BMPR1A		ITGAV	APEX2
SLC25A14	RPS6KB2		WNT4	TXNRD3		PAPSS2	BCR		PAPSS2	LAMB1
SNORD94	PPL		KIF12	CHST3		NFAM1	PPIP5K2		NFAM1	PPIL2
SPDYC	OGT		S100A2	MED20		SLC2A6	CALR		SLC2A6	KIDINS220
SSPO	GRHL2		SMOX	WDTC1		RAB3IP	BST2		RAB3IP	TMEM87A
STX1B	IGFBP5		TMCC3	ERVK13-1		NPHS1	PTOV1-AS1		NPHS1	DLG1
THOP1	MYO5C		HTR1D	CASP3		DAPP1	PRKAR1A		DAPP1	SREK1
TLX1	CRCP		HSD11B2	TMEM80		SH3TC1	NDRG4		SH3TC1	ECSIT
TMEM158	INTS1		FZD9	CEBPA		PIM1	LOXL1-AS1		PIM1	SLC29A2
TMEM17	CNOT3		PXDC1	CLCN2		HIP1	ARHGAP1		HIP1	ZNF544
TMEM176B	EPS8L1		SLCO4C1	CD151		TMEM106A	ACTL6A		TMEM106A	ENTPD2
TMEM185A	NAP1L4		ATF3	MBD4		NFKBIE	ACVR1B		NFKBIE	RAPGEF1
TRAM1L1	NR2F6		NHS	RNF41		MBNL2	ASNA1		MBNL2	LRRFIP1
TRIM71	PRLR		KCNF1	BRAF		RASGRP1	ARRB2		RASGRP1	NARFL
TRIM9	STXBP2		FOS	BNIP2		EFNB1	FBXL13		EFNB1	MBNL1
TTC36	GNA12		OXTR	BCL9		EFNA1	ACP1		EFNA1	TOM1
TULP1	PRPF31		NUAK2	SDCBP2-AS1		EGR3	BANP		EGR3	TRIOBP
UPK1A	FAM107B		GALNT18	BCR		DUSP5	MRPL9		DUSP5	ASXL2
UTS2	MOSPD3		MAOA	CAD		DUSP10	CLEC7A		DUSP10	GNAQ
VSIG2	CCNG1		ZSWIM4	LOC100287015		IFNGR2	ZCCHC10		IFNGR2	ATP6V1B2
WNT11	TRIP12		NFKBID	OSGIN2		GFOD1	SPATA13-AS1		GFOD1	CSNK2A2
WTIP	TNPO2		RPS6KA2	PTTG1IP		SLMAP	ZCCHC7		SLMAP	IFT27
XKR9	ULK1		NKX3-1	LOXL1-AS1		CHGA	PRKCSH		CHGA	SFSWAP
ZNF442	TAF6		OLFML3	NISCH		CHST7	MPI		CHST7	XXYLT1
ZNF611	TAF1C		KLHL5	ARHGAP1		MAK	LOXL3		MAK	RPRD1B
	MATR3		GAL	ACTL6A		PHLDA1	ZNF302		PHLDA1	CCDC130
	JMJD8		SOGA2	ACVR1B		GNA12	TMED3		GNA12	KIF3B
	MAVS		HIATL2	BAD		SHB	POLR1D		SHB	VAC14
	TBL1X		NTN4	SUPT5H		SLCO4C1	PPCDC		SLCO4C1	SUGP1
	SNX12		TGFBI	ASNA1		EGR2	ANKRD42		EGR2	ZNF276
	SLC39A9		IRF1	ACP1		PBX4	CAPZB		PBX4	FSTL3
	ZNF512B		TNFAIP8	SCAMP4		FOXI1	DENND1B		FOXI1	HECTD4
	VGLL4		ALOXE3	BANP		PTP4A3	SLC29A2		PTP4A3	RALGAPB
	KITLG		RUNX2	MRPL9		ELOVL5	SMUG1		ELOVL5	WDR81
	MDM2		NFATC2	ZCCHC10		PIGA	BTF3L4		PIGA	CACUL1
	ZNF524		UPP1	SHBG		SLC9A7P1	RABGAP1L		SLC9A7P1	INTS10
	FASTK		DUSP5	PRKCSH		BTN3A3	LIMA1		BTN3A3	MAP3K2
	ACAT1		GATA6	FAM96A		RAPGEF5	APH1A		RAPGEF5	SLC30A9
	TMOD3		RND1	METTL23		MGAT4A	DBN1		MGAT4A	TADA2B
	MED25		CNKSR3	TC2N		LOC389641	DAP		LOC389641	ODF2
	PURB		RELB	MAVS		TNFSF10	DDX6		TNFSF10	CCDC71
	PPP1R9B		TMEM106A	IKBKB		SERPINE2	DDX11		SERPINE2	CSNK1G1
	ATP2A2		MAP3K8	CAPN1		MAFF	FAM20A		MAFF	COPS7B
	ZER1		TSPAN5	MPI		TMCC3	CROT		TMCC3	C5orf51
	DIP2A		NFKBIZ	ZNF227		NFATC2	ZNF124		NFATC2	TXNRD2
	NAA60		SERPINA3	KCNIP3		C3	CRABP1		C3	KCTD20
	CYTH1		CLDN1	TMED3		DUSP6	CSK		DUSP6	SS18
	SH3BP4		ARAP2	PPCDC		OPTN	CREBBP		OPTN	CNTROB
	REEP6		STAMBPL1	BSDC1		EXT1	NUDT8		EXT1	FOXRED1
	NCOR2		FRMD5	ANKRD42		GCH1	CNN2		GCH1	XPNPEP1
	UAP1L1		PAQR7	PTBP2		HSD11B2	COX6C		HSD11B2	AGAP1
	TMEM121		HSPA12A	CAPZB		AKR1C2	COPA		AKR1C2	SEMA4A
	ANKRD13D		MAP3K14	DENND1B		PTCH1	SWSAP1		PTCH1	LTBP1
	PLK2		LRRN2	DDX46		NAB1	EXOC8		NAB1	FBXW9
	AHSA2		EGFR	SLC29A2		MITF	ZNF74		MITF	AP2A2
	DDX60L		TRIM47	PARD3B		MAOA	SSBP1		MAOA	CDK13
	EVA1B		PHLDA1	ARHGAP5		ICAM1	STX18		ICAM1	PIP5K1C
	SIL1		TIFA	ACVR1		MGC16275	LINC00659		MGC16275	NFX1
	TSPAN17		ADORA2B	BBIP1		NOC3L	WDR92		NOC3L	TMEM161A
	BSDC1		PLAUR	SMUG1		FAM102A	CMPK2		FAM102A	BICD2
	DDX23		IGFL1	CHST12		CMAHP	SLC12A2		CMAHP	GPATCH8
	ILK		GPR27	EZR		CLEC2D	B9D1		CLEC2D	SNX8
	NSD1		LOXL2	TSC22D1		SOX9	CTNND1		SOX9	DAGLB
	SLC35A4		IL17RB	POMGNT1		STAT5A	STOM		STAT5A	TUT1
	UBXN7		CCRN4L	LIMA1		TGFBI	EIF4EBP2		TGFBI	GALNT2
	NDUFC2		CLIP2	DBN1		LTV1	SETDB1		LTV1	RNF6
	CLN6		OTUD1	DAP		TNFRSF10B	LONP1		TNFRSF10B	POFUT1
	SYT12		USP43	DDX6		IFNGR1	ATP6V0B		IFNGR1	FAM192A
	CASKIN2		S100A8	DDX11		VRK2	ATP5A1		VRK2	GTF2A1
	EFCAB14		SUZ12P1	CTSH		CXCR4	ASPM		CXCR4	PDLIM2
	DCAF5		LOC100862671	API5		VHL	TGOLN2		VHL	YTHDF3
	CPSF7		CTU1	C7orf49		BCL2L14	RAB11A		BCL2L14	NUDCD3
	EFR3A		B4GALNT2	CRABP1		WNT4	DDO		WNT4	MRRF
	VAPB		RAPGEFL1	CREB1		BDKRB2	IRF7		BDKRB2	SEC24B
	YAP1		SOX9	CTBS		NOL6	KAT5		NOL6	MKRN2
	CHST15		ADAMTS9	CSK		SOD2	ACOX1		SOD2	MNT
	PTGFRN		SHB	CREBBP		ABAT	INPP4A		ABAT	DTNBP1
	SHARPIN		TNFRSF21	COX6C		ADORA2A	AP2M1		ADORA2A	FBXO11
	KDM5C		WNT3A	COPA		ADORA2B	AP2S1		ADORA2B	CBFA2T2
	LRFN4		SHOX2	USP28		ADRA2A	CCNG1		ADRA2A	SP2
	SENP3		PAPSS2	UHMK1		NTN4	SPECC1		NTN4	RALBP1
	CCM2		IFNAR2	RALGAPA1		VMP1	DLG1		VMP1	DIP2B
	PPP1R15B		TRAF3	SWSAP1		DRD1	TP53I3		DRD1	ARID1B
	NUP210		PTGES	EXOC8		CYP4B1	DCTN1		CYP4B1	ZNF324
	SORBS3		ARL4C	ZNF74		CSF1	DDIT3		CSF1	IL13RA1
	PLXNB1		GRHL3	CTR9		ITGB6	COX8A		ITGB6	OCRL
	AP1G1		TP53INP2	MSTO1		HTR1D	CLK1		HTR1D	REEP3
	MAP4		EFR3B	SLC25A1		SPRY4	MEIS3		SPRY4	TMTC3
	PROM2		SLC7A11	TBC1D10C		FNDC3B	CHAC2		FNDC3B	PNPLA6
	GSTM4		APOL2	SSBP1		TNS3	FDX1		TNS3	S100PBP
	EHMT1		OPTN	STX18		NUAK2	DYRK1A		NUAK2	C19orf25
	SNORA49		DUSP4	PRPS1L1		BOP1	FGF12		BOP1	MRS2
	IFIT5		S100A9	ARHGEF25		ICOSLG	FEN1		ICOSLG	TECPR2
	PLOD3		FAM222A	C19orf47		IKBKE	FGF13		IKBKE	CDC73
	ARHGEF12		ICAM1	ZBTB7B		FRMD4B	FKBP1B		FRMD4B	RNF214
	ZNF768		STK17B	SLC12A2		GBP3	CP		GBP3	BBS1
	RMND5A		EGLN3	SRGAP1		UBE2Z	P2RX4		UBE2Z	MBD2
	PHF2		EGR1	KIAA1468		STARD5	ZNF287		STARD5	DCUN1D4
	NCK2		NAB1	B9D1		ZSWIM4	PAF1		ZSWIM4	BCL2
	RAC3		RIPK2	CTNND1		RRS1	UHRF2		RRS1	MSL2
	DPF2		EIF5AL1	ECHS1		SPTSSB	CMPK1		SPTSSB	LANCL2
	SGSM3		CEBPD	EIF4EBP2		CYP4Z2P	XAF1		CYP4Z2P	C5orf24
	CACNB3		RASSF3	EIF4EBP1		METTL1	GPX2		METTL1	FYCO1
	PARP1		PRKAR2B	SETDB1		JMJD4	PCCB		JMJD4	ADSS
	TRANK1		PTP4A3	LONP1		RNF19A	DBI		RNF19A	MBTPS2
	PSMC2		C10orf114	TFR2		IRGQ	PIKFYVE		IRGQ	STK35
	SETD3		VDR	CTDSP1		DGAT2	BBS12		DGAT2	BOD1L1
	SNORA6		FJX1	ARRB1		BBC3	AIP		BBC3	ABI2
	TXLNA		IRF2BP2	RHOB		BID	USP3		BID	ASB7
	GOLGA3		ZC3H12A	ATP5A1		AKR1C3	USP39		AKR1C3	L3MBTL2
	SYMPK		F2RL1	ATIC		PLA2G4C	ANAPC10		PLA2G4C	RNF14
	CNP		LRIG1	TGOLN2		CHST1	MELK		CHST1	RANBP3
	PACS2		MBNL2	ANXA7		EGLN2	ZBED6		EGLN2	R3HDM1
	TNFRSF10B		TRIB1	KAT5		KMO	ECI1		KMO	H6PD
	GTPBP1		UVRAG	ACOX1		FZD7	CASP8AP2		FZD7	TROAP
	ATG13		ETS2	INPP4A		FZD9	MEX3D		FZD9	RNF123
	TOM1L2		FAM20C	AP2M1		PIP5K1B	GOLGA7		PIP5K1B	KAT6A
	SAMD4B		KLF4	AP2S1		BCAR3	MIER2		BCAR3	RBM28
	FURIN		NFKB1	CDKN1B		KYNU	GRIP1		KYNU	NDFIP2
	PPP3R1		GCH1	TTC39C		TNFRSF10A	ASNS		TNFRSF10A	PRDM2
	UBL4A		SLC2A6	CAPS		KLF6	NSMF		KLF6	ZNF142
	TMEM214		MPZL2	BDH1		CBLN3	TSPO		CBLN3	NAA30
	CFLAR		KRT7	BCL2L2		RIPK2	RABEPK		RIPK2	ATP11A
	RAB35		ECE1	SPECC1		KCNK5	ZFX		KCNK5	ZNF211
	ECE1		NOL6	DLG1		STX11	EXT2		STX11	AIFM2
	AKIRIN1		SHISA2	TP53I3		MAP3K8	PKM		MAP3K8	MED20
	CCDC88C		TNFRSF11B	DCTN1		THBS1	ARID4B		THBS1	MCAT
	ITGB6		BARX2	COX8A		ICAM4	ZNF182		ICAM4	ARMC8
	SLC22A18		MYO1E	CS		UAP1	CPNE1		UAP1	NME6
	MCRS1		SPHK1	TMED8		SOX4	SLC29A3		SOX4	UCHL5
	POFUT2		IFNGR1	CHAC2		ZFP36	TMEM185A		ZFP36	RILPL1
	PRPF3		AEN	FASN		WNT10B	ILF3		WNT10B	VPS53
	STK11		PALLD	DYRK1A		VCL	LOC730102		VCL	ZFX
	AGBL5		IFNGR2	DDX39A		EFEMP1	POU2F1		EFEMP1	MIER3
	PHC2		GBP2	FGF11		UVRAG	RAB27B		UVRAG	GZF1
	BRIP1		ERRFI1	FDXR		UPP1	SDHA		UPP1	DUS3L
	TOMM40		PITX1	FKBP5		UGCG	OAZ1		UGCG	IMPAD1
	RFNG		NFKBIB	FKBP1B		TRAF3	PRKAR2A		TRAF3	C6orf120
	HSD3B7		VGF	P2RX4		MED9	PRKAG1		MED9	DLX1
	KCTD15		CCDC58	GMFB		NPR3	NDUFB7		NPR3	NETO2
	ELK1		SMAD3	ZNF287		DUSP4	SP100		DUSP4	POLR3A
	SUGP2		BATF	LRFN5		RUNX2	LLGL1		RUNX2	FBXW8
	MTMR11		FAM107B	PAF1		TMEM2	IREB2		TMEM2	AP3M1
	SMG7		HES4	UHRF2		SLC9A7	IDH3G		SLC9A7	RNF166
	SUMF1		EXT1	CMPK1		MYCN	OGFOD3		MYCN	RNF111
	CCDC6		NFKB2	RNF8		CYP4F22	ZADH2		CYP4F22	TSPAN6
	FMR1		B4GALT1	PCCB		HSPA2	GPS1		HSPA2	PPCDC
	ARID1A		COTL1	DBI		BZW2	PSMD13		BZW2	ITGB1BP1
	MTMR4		TMEM238	TUBGCP2		TVP23C	DHDDS		TVP23C	LRRC8D
	PHLDB3		CEBPB	BRSK2		NCOA7	MTMR2		NCOA7	KIAA2026
	MED15		JUN	PCCA		APLP1	C5orf51		APLP1	PPOX
	DMKN		SOD2	TRIM46		HSPA8	LNPEP		HSPA8	ZNF558
	OGG1		ITGAV	AIP		NTNG1	UXT		NTNG1	HERC4
	SSFA2		IFI6	USP3		ECE1	PGAP2		ECE1	ZNF561
	CRTC2		SPTSSA	USP39		LAMC2	PPME1		LAMC2	DCAF16
	CUL7		NFKBIA	PCBP4		FAM86EP	UQCRHL		FAM86EP	MAP4K3
	AGO2		C4orf48	CNOT10		RELB	PCF11		RELB	MIS12
	SH2B1		EFNA1	ECI1		TRIM16	RSPH3		TRIM16	STAG1
	B4GALT2		THBS1	ANAPC7		ERRFI1	PKP2		ERRFI1	FAM13B
	NDRG1		ZFP36L1	FNIP1		SEMA3C	ANAPC11		SEMA3C	TTC9
	PHF14		TIMP1	ZBTB37		BATF	PMS1		BATF	TMEM128
	PDE4DIP		SDC4	SLC11A2		APOBR	FAM104A		APOBR	KRBA1
	CERS6		TNFRSF12A	GOLGA7		TNFAIP3	KLF13		TNFAIP3	ARFGAP3
	EP300		ATP1B1	ZBTB42		TNFAIP2	PDE6D		TNFAIP2	BPNT1
	NBEAL2		DKK1	MX1		IL17RB	PPP4R1		IL17RB	UVSSA
	ELMO3		EIF5A	ZNF732		CLDN1	SNAPIN		CLDN1	KREMEN1
	GPR137			ASNS		PMAIP1	MED24		PMAIP1	TIPIN
	UBR7			IRF6		NDUFV2	NBAS		NDUFV2	PKD2
	TNIP1			STAT6		SLC5A6	MRRF		SLC5A6	APTX
	THBS3			NSMF		TRAFD1	ATG13		TRAFD1	KIAA1549
	C5orf38			SEMA6C		LIF	AZI2		LIF	UACA
	SIN3A			KIAA1656		HJURP	THADA		HJURP	CCDC51
	TUBGCP2			RABEPK		STYK1	MTCH1		STYK1	MSRA
	MADD			SAMD8		EGFR	LOC441155		EGFR	USP13
	CASC3			ZFX		IL17C	DTNBP1		IL17C	TEAD4
	CBFA2T3			CACNA2D2		PTPRJ	ACTR2		PTPRJ	PCDHA11
	PRR12			EXT2		HIVEP2	MYL6		HIVEP2	BTBD10
	EPB41L5			ARID4B		WDR3	SLC35A3		WDR3	RAD51D
	SNORA56			ZNF182		CHDH	PYCR2		CHDH	SMAD2
	SCOC			CPNE1		DRAM1	GPNMB		DRAM1	DIS3L2
	RDH13			FAM53A		COTL1	MTIF2		COTL1	CYP4F11
	SRRM3			SYTL4		RPP40	ZNF32		RPP40	FBXO2
	RNF19B			SMG7		2002-03-01	MAGED1		2002-03-01	HSPA13
	ADAM10			SLC4A11		SAT1	LTA4H		SAT1	THADA
	SUPT6H			TMEM185A		SDC4	RASSF1		SDC4	ZBTB6
	GPBP1			ATXN1L		CX3CL1	DHPS		CX3CL1	MOB1B
	MAFK			POLL		CCL22	CDC42SE1		CCL22	DGKH
	ANAPC2			ILF3		TRIB1	LASP1		TRIB1	WARS2
	EML2			LOC100129518		RGS16	BASP1		RGS16	RGL4
	CEMP1			NSFL1C		S100A8	PPP1R12C		S100A8	ZNF468
	DMAP1			ITGB3BP		SPTSSA	GNAS		SPTSSA	RAB2B
	SAFB			POU2F1		SDF2L1	EXOSC9		SDF2L1	RAP2A
	HLTF			TTLL3		MAPK6	AP3B1		MAPK6	CLDN15
	INSIG2			RAB27B		PRKAR2B	HDLBP		PRKAR2B	ZNF266
	DBP			RAB5A		PITX1	EIF2B4		PITX1	SLC25A26
	PAFAH1B2			RAB1A		TICAM1	NEDD4L		TICAM1	NSRP1
	ARAP1			HYI		DAB2IP	TPD52L2		DAB2IP	KLHL42
	ACBD3			OAZ1		ZNF101	APOE		ZNF101	MUTYH
	AK2			PRKAR2A		IGFL1	MARCH2		IGFL1	MAPK8IP1
	SART3			DRG1		SLC16A9	SET		SLC16A9	ABCG2
	PCDH1			PRKAG1		KLHDC7B	CSNK1A1		KLHDC7B	HSD17B12
	GRK6			NDUFB7		KIF12	APEX2		KIF12	EXOC6
	MINK1			SP100		ZNF804A	APOPT1		ZNF804A	ZNF17
	RNF26			ZNF493		FGB	ARID5A		FGB	SMARCAD1
	P2RX4			IDH3G		UBALD2	FBXO38		UBALD2	NELL2
	SENP2			HSPA9		IRF1	ZNF57		IRF1	EPG5
	FRAT2			OGFOD3		LIN9	HMGA1		LIN9	GMEB1
	RALGDS			ZADH2		FOXO1	NUDT9		FOXO1	EXOC8
	PLEKHA6			GPS1		FRK	YIPF5		FRK	PIAS2
	TRAPPC10			GTF2F2		FTH1	COPZ1		FTH1	APOOL
	ITPRIPL2			PSMD13		B4GALNT2	ITGB1BP1		B4GALNT2	DIAPH2
	CDCA4			CBFA2T3		SAMD9L	MKRN2		SAMD9L	COG6
	NFAT5			DHDDS		CCDC89	ACHE		CCDC89	SCAND2P
	FDXR			GBF1		FAM84A	MARVELD2		FAM84A	DUS4L
	VPS39			MTMR2		NGFR	TEP1		NGFR	TMEM25
	PAPSS2			ILDR1		TNFRSF11B	TARS2		TNFRSF11B	MECR
	PJA2			CDKL1		PDE4B	ATXN2		PDE4B	PRDM10
	TEAD2			C5orf51		MYC	CLTA		MYC	NAIF1
	ATP5SL			LNPEP		FRMD5	OS9		FRMD5	ZNF354B
	EPS15L1			UXT		LOXL2	OPA3		LOXL2	USPL1
	GYS1			TANK		TAF4B	TMPRSS4		TAF4B	PLEKHA8
	ATP6V1A			TARBP2		TRIM47	KIAA2026		TRIM47	TMEM192
	TBC1D14			SLC9A3		KIF3C	TMEM30B		KIF3C	PACRGL
	GLI4			SNRPD3		JUNB	DCAF6		JUNB	RAD18
	RPRD2			RSPH3		KCNF1	SF3B1		KCNF1	MAP2
	PLEKHH3			DNAJC10		TRIM16L	CTBP2		TRIM16L	GOLT1B
	FAM199X			CHD3		SERTAD2	CCDC120		SERTAD2	METTL21B
	NF2			ANAPC11		ETS2	RSRC1		ETS2	PM20D2
	KIAA0513			TRIM37		GPAM	SCIMP		GPAM	TM2D2
	AP1M1			MMS19		SH2B2	TBC1D16		SH2B2	ARHGAP4
	MYADM			FAM104A		C2CD4A	CDK2AP2		C2CD4A	POLR3B
	RND3			ACP2		USP43	HM13-AS1		USP43	REEP2
	ASAH1			PDE6D		UNC5B	CEP57L1		UNC5B	PLAGL1
	NUDT2			ITPA		DLGAP3	RRAGC		DLGAP3	FAM122A
	BLOC1S3			SNAPIN		ARHGAP31	GTF2H3		ARHGAP31	CDKAL1
	VPS26B			MED24		SGK223	KHDRBS1		SGK223	HHAT
	PRICKLE4			GATAD1		GOLGA7B	AAR2		GOLGA7B	WDR27
	ZNF609			MRRF		NFKBIA	CYB561		NFKBIA	PHKA1
	ATF7IP			ATG13		NEURL1B	PFKFB1		NEURL1B	GTPBP10
	TELO2			ZNF138		NQO1	REEP2		NQO1	DPH5
	POLDIP3			THADA		BIRC3	ORAI2		BIRC3	GDF11
	TRMT2A			MTCH1		NPY1R	SERPINB6		NPY1R	N6AMT1
	IP6K1			DTNBP1		GATA6	EPN2-IT1		GATA6	CPEB2
	TIMM8B			ACTR2		FAT1	PUS7L		FAT1	TERF1
	SGSH			MYL6		PMEPA1	DPP3		PMEPA1	C11orf74
	BAP1			PYCR2		LINC00854	MXI1		LINC00854	RFX2
	MEGF9			GPNMB		CEBPD	DPP8		CEBPD	POC1A
	FUBP3			AK4		GFPT2	TSPAN17		GFPT2	ARHGAP29
	SMUG1			PRR13		SLC23A2	UBE3B		SLC23A2	OTUD3
	MFN2			KDM2B		SH2D3A	RBMX		SH2D3A	ZNF287
	TMEM167B			DNM2		SLC7A11	FXYD6		SLC7A11	GPR180
	E4F1			MTIF2		OPN3	IL17RA		OPN3	FAM111B
	DENND5A			ZNF32		DAPK2	EEF1D		DAPK2	NANOS1
	SLC19A1			LRSAM1		TNFRSF21	ZFP41		TNFRSF21	TMEM67
	SPTBN2			MAGED1		RND1	PCED1A		RND1	B3GNT3
	ANKLE2			LTA4H		KRT7	RAP2C		KRT7	LOC81691
	GMPPA			CACNB3		DMXL1	WRNIP1		DMXL1	TAF1L
	RIF1			TAX1BP1		BOK	ATXN2L		BOK	DYX1C1
	RCC1			PICALM		UST	ASB14		UST	LY6D
	RNF121			NBPF10		B4GALT1	GBA		B4GALT1	ME2
	RNF168			PPP2R2C		ERN1	CHMP3		ERN1	NAGS
	WWP2			DHPS		ELL3	VPS54		ELL3	MMP11
	PCF11			CDC42SE2		AKR1C1	TIPIN		AKR1C1	GPC2
	FPGS			CDC42SE1		MAP3K1	PPP3CB		MAP3K1	CCDC148
	ZCCHC2			JPH3		ATP1B1	ZNF512		ATP1B1	TRMT13
	MAN2A2			STX10		FAM222A	SUMO1		FAM222A	ZNF430
	DOK4			PPP1R12C		IRAK2	ERP29		IRAK2	ZNF793
	AAR2			MEF2D		CXCL10	MSMO1		CXCL10	ADAP2
	TFAP2A			GNAS		EGR1	SP3		EGR1	MTRF1L
	EVPL			DDX54		FAM86HP	SUGP2		FAM86HP	SRPX
	WIZ			DYNC1I2		ELOVL2	ASXL1		ELOVL2	IFI6
	SOGA1			PSMD6		CLUHP3	FZD6		CLUHP3	UBE2L6
	JARID2			EXOSC9		ARID5B	ENDOV		ARID5B	MYD88
	ZMYM2			RALGDS		SERPINA3	GRB2		SERPINA3	SCRN1
	ACOT8			AP3B1		SLC41A2	KIAA1549		SLC41A2	SAMHD1
	TXNL4A			ARNTL		AOX1	SUMF1		AOX1	N4BP3
	PPP2R5D			HDLBP		FAM220A	ZNF780B		FAM220A	PPP6R1
	IRF1			MAPKAPK3			PNISR		SLC5A5	ARFGAP1
	STARD3			PRPSAP2			STOX2		MMP12	ALKBH5
	GBF1			KIF2A			ALDH18A1		CYP2S1	CHPF
	RAVER1			EIF2B4			MAEA		NPTX1	MTA2
	ASAP1			NEDD4L			GOPC		MMP13	ENTPD6
	TC2N			SPHK2			USP1		IGF2	NAP1L4
	RNF19A			B3GALNT1			IQCH		DDX60L	CCNG1
	AMBRA1			TOB1			HPS1		IFIT2	TRIP12
	ESPN			TPD52L2			PHACTR4		CXCL14	VGLL4
	SLC25A44			APOE			ZBTB10		PTAFR	ACAT1
	ATP2B1			TRIM2			AACS		LAMP3	NAA60
	BCKDHB			ARNTL2			ZNF799		NECAB1	EVA1B
	CAMTA1			TRIM3			MOSPD3		GBP1	NDUFC2
	ETNK2			CSNK1A1			DLK2		MICAL2	DCAF5
	OTUD7B			APEX2			FUNDC2		GLIPR2	CHST15
	FAM65A			C5AR2			MRPS34		CPLX2	PTGFRN
	BTBD7			MTX2			DDRGK1		PHOSPHO1	IFIT5
	C6orf89			ZNF226			STAG3L4		LRRC8C	ARHGEF12
	STK40			RUVBL1			STAG3L3		FOSL1	TRANK1
	KANSL3			NUDT9			ZNF266		WNT5A	CNP
	PRSS22			YIPF5			JMJD8		CXADR	FURIN
	MSI2			COPZ1			ARHGAP4		FZD8	CCDC88C
	GFER			ITGB1BP1			NPAS3		CDC42EP3	HSD3B7
	HDAC7			MKRN2			ATP7B		FAM167A	SUGP2
	IL17RE			GEMIN7			FURIN		F3	SUMF1
	NOXA1			SLC2A8			BCKDHA		GEM	MTMR4
	MON1B			ACHE			SLC25A26		C3orf52	SSFA2
	UBALD2			DHX8			ZFHX3		NCR3LG1	EPB41L5
	TFDP1			COX7A2L			ZNF211		HBEGF	RNF19B
	GTF3C4			CAPNS1			BTBD11		FOSB	ADAM10
	TPP1			TEP1			DCAF16		ADM	PLEKHA6
	PIK3IP1			AAGAB			PRR5		GPR115	VPS39
	CEBPA			CLTA			UFSP2		WNT11	ATP6V1A
	DCTN4			BLOC1S6			ZFR		SERPINE1	NF2
	CS			OS9			TRIM8		KRT16	NUDT2
	SS18L1			ZHX1			DHX29		BPIFA4P	BLOC1S3
	AIM1			WDR62			RWDD2A		MERTK	TIMM8B
	UBAC2			OPA3			ENTPD6		HLA-DQB1	MFN2
	APEX2			TRIT1			DLD		TMEM158	SLC19A1
	GATS			KIAA2026			ZNF783		CAV1	RCC1
	SUCO			HSP90AA1			AP4B1-AS1		UMODL1	PCF11
	SERINC5			ASRGL1			SS18L1		NUDT4	FPGS
	LRSAM1			SF3B1			LRTOMT		PLEKHA4	DOK4
	WDFY1			CDK2AP2			EMC1		ZMYND15	AAR2
	PTBP3			KHDRBS1			TTC19		AP3B2	ASAP1
	SEC23A			SRGAP2C			OPA1		S100A2	FAM65A
	CSTF3			CYB561			UBE3A		PXDC1	C6orf89
	IFNGR2			PFKFB1			HP1BP3		NHS	IL17RE
	DMTF1			REEP2			CNOT1		FOS	TPP1
	KCTD5			RCCD1			DCXR		OXTR	SEC23A
	NBPF1			SERPINB6			SH3BP5-AS1		GALNT18	GPR107
	LAMB1			NUDT22			PTPRN2		NFKBID	MAP2K7
	GPR107			DPP3			C6orf132		OLFML3	TARS2
	MAP2K7			COL18A1			KLF2		GAL	KRCC1
	JMJD4			PTPRF			LOC284581		SOGA2	FAM134C
	TARS2			MXI1			HSPA14		HIATL2	BMPR2
	KRCC1			MADD			UIMC1		ALOXE3	NELFA
	MLXIP			JDP2			HSD17B11		CNKSR3	ZNF672
	PPIL2			TSPAN17			SNX1		TSPAN5	MYCBP2
	HEXDC			TOR2A			DYNLRB2		NFKBIZ	CD68
	TMEM184A			RBMX			FZR1		ARAP2	ASH1L
	KIDINS220			ACIN1			ZNF12		STAMBPL1	MTMR3
	FAM134C			DCAF17			AKAP11		PAQR7	TMEM30B
	IQSEC1			PUF60			BIRC6		HSPA12A	CITED4
	PLBD1			IL17RA			NDRG2		MAP3K14	UBE2K
	RREB1			GUSBP4			BRE		LRRN2	NIT1
	BCCIP			IDH2			R3HCC1		GPR27	GBA
	PIGC			ERBB2			DHRS7		CCRN4L	PARP3
	BMPR2			EEF1D			TAB2		CLIP2	USB1
	SGMS1			ZFP41			CCNE1		OTUD1	YES1
	NGDN			PCED1A			JMJD1C		SUZ12P1	ANKRD52
	TMEM87A			RAP2C			RAD54L2		LOC100862671	TBC1D16
	NELFA			EXO1			AMOTL2		CTU1	PCM1
	KLHL22			LOC100505666			ZNF580		ADAMTS9	ZNF76
	ZNF672			ATXN2L			BSG		WNT3A	GIT1
	MYCBP2			ATRIP			C3orf18		SHOX2	FBXL6
	STX6			NUMB			SEC31A		ARL4C	PLOD1
	SRRM1			CHMP3			VPS28		GRHL3	TIGD5
	POLL			GJB3			TRAPPC2L		TP53INP2	ATRX
	MAPK14			ULK4			PRKAG2		EFR3B	PHTF2
	NECAP2			ATP6V0E2			DDX41		APOL2	ORMDL1
	SECISBP2L			TIPIN			ACOT2		S100A9	EPS8
	NUP160			PPP3CB			ZNF79		EGLN3	PEX26
	ETS2			ZNF512			MAN1B1		EIF5AL1	TP53BP1
	CCDC97			DICER1			HECA		C10orf114	CBL
	NEO1			ERP29			DBR1		FJX1	CD2AP
	DUSP3			MSMO1			PRRC1		IRF2BP2	LARP6
	ZNF618			TMCC1			RMDN2		ZC3H12A	EXOSC10
	C6orf226			ZNF2			MEN1		F2RL1	RC3H1
	ANXA6			ASXL1			DNAJC19		LRIG1	KLF13
	RNF43			KEAP1			FAM120AOS		FAM20C	CAPN7
	TMEM79			G3BP2			DYX1C1		MPZL2	R3HCC1
	ASF1B			GRB2			CTDSPL2		SHISA2	SARS2
	DTNA			CDK11A			OSCAR		BARX2	KIAA1429
	LRFN5			KIAA1549			AP2A1		SPHK1	RPS6KA4
	ARSD			ZNF780B			A1BG		AEN	CLASP1
	DLG1			RYK			ANKFY1		VGF	MPP5
	FN3KRP			LTB4R2			NUSAP1		CCDC58	NR2C1
	ETNK1			HNRNPH3			ACP6		HES4	KIAA1109
	CD68			ALDH18A1			INPP5K		TMEM238	KIAA0141
	ASH1L			ESCO2			NIN		CEBPB	SNX11
	GEMIN7			PGBD2			MBNL1		JUN	PMPCB
	SREK1			MAEA			ZNF510		IFI6	PHF12
	IFRD2			GOPC			EIF4ENIF1		C4orf48	OLFM3
	ENC1			SH3BP5L			SVIP		TIMP1	TPGS1
	ECSIT			HPS1			BOD1L1		TNFRSF12A	PARP4
	TDRKH			BRD9			C11orf74		DKK1	NFS1
	ABCD4			AACS			MRPL10		EIF5A	CCDC125
	SLC29A2			GSS			KDM5B		ABCG1	RPRD1A
	C11orf58			RASL11B			SNAP23		ACHE	ZNF584
	ZNF544			MOSPD3			XPR1		ACSF2	AP4E1
	ENTPD2			CHID1			FAM96B		ADHFE1	SUCLG2
	RAPGEF1			MRPL34			CHCHD10		AMACR	SLC39A11
	ABT1			MRPS34			ZNF639		ANGPTL6	SNAP23
	GINS2			DDRGK1			SRRM2		AQR	RASA1
	LRRFIP1			STAG3L4			GPR89B		ARL14	CREBRF
	MTMR3			STAG3L2			ZNF274		B3GNT4	ARID2
	BCL2L2			ZNF266			IPO11		BCL9	VPS13C
	PPM1B			JMJD8			ZNF160		CABP4	FAR1
	NARFL			ARHGAP4			ATPIF1		CALHM3	RASSF1
	HIST1H3E			NPAS3			WBP11		CCDC122	LGALS8
	TMEM30B			NOS1AP			CRBN		CD37	CCDC90B
	ZFYVE27			IP6K2			SS18L2		CES3	FBRSL1
	CITED4			CC2D2A			RSL24D1		CLEC3B	DCAF6
	UBE2K			ATP7B			PRRX2		CLSTN3	ARRB2
	CAMTA2			BCKDHA			RAB14		CPNE5	FUK
	NIT1			SLC25A26			HERC5		CTSO	MBOAT2
	DMWD			BCAT2			COPS7A		DCDC2B	CRYZ
	HMOX2			ZNF211			PDLIM5		DOCK5	VPS41
	DAB2IP			BTBD11			CNOT7		DSCAML1	URGCP
	ZNF629			DCAF16			NBPF3		DUSP15	CLDN23
	GBA			GPI			MIRLET7DHG		ELFN2	JMJD1C
	PARP3			PCBD1			RPL32		EPO	ENTPD5
	ING4			LMAN2L			IFT52		EPX	RFK
	REXO4			ZFR			WIPI2		FAM151B	KRIT1
	MBNL1			TRIM8			UBE2J1		FAM69B	FAM120B
	USB1			RWDD2A			RBMX2		FAM71E1	NFIX
	UNKL			DLD			RDH11		FKBP10	MIB1
	TANC1			PRADC1			METTL9		FKBP1A	CUL5
	DMXL2			GAPDH			LUC7L2		GALR2	PPP4R1
	TOM1			ZNF783			MECR		GLI3	PSD3
	NR2C2			HSD17B1			NDUFAF1		GMFG	INPP5A
	WWOX			SS18L1			EXOSC1		GNMT	TIMELESS
	TRAF2			XPO5			DERL2		GNRHR2	SIAH1
	TRIOBP			EMC1			RMDN1		GRID2IP	MAGEH1
	ASXL2			TTC19			TRAPPC12		GZMA	KDM5A
	LRRC1			UBE3A			LACTB2		HERC1	TMEM234
	PPFIA3			HP1BP3			MRPS16		HIST1H4F	MYEF2
	YES1			CNOT1			ERV3-1		HIST4H4	SVIP
	SYT7			DCXR			FIS1		HOXD10	SLC29A4
	HIST1H2BC			UBE2L3			PAM16		HTR2B	GOLIM4
	XPO5			AK3			PRDM2		INHBA	PBRM1
	ANKRD52			AMOTL1			MED31		IQCG	ZNF837
	GNAQ			ATN1			GLOD4		KAAG1	ZNF174
	ATP6V1B2			ALG8			STYXL1		KISS1R	LTN1
	TRMT2B			RAB23			ATRAID		KRT20	PHLPP2
	DUSP1			PTPRS			GOLT1B		KRTAP10-11	CLCF1
	SNX19			BMP4			BOLA1		LEKR1	MATK
	ATG4D			SLC41A3			EIF3L		LHX4	KLHL9
	ORAI1			FNBP1L			RPL26L1		LIPH	DCLRE1C
	USP42			EPN2			COMMD2		LRRC25	DSG2
	CSNK2A2			TRAP1			IER3IP1		LRRC29	R3HCC1L
	RNF216			PSMA1			KLHDC3		MAGEA8	NAT6
	ADH5			CDK5			STMN3		MAPK15	OSBPL8
	TBC1D16			HSD17B14			TRIM54		MUC6	RBM45
	FAAH			SUCO			CHAMP1		MYL9	FICD
	PIP4K2A			VPS29			PPP6R3		MYOM1	GAS6
	IFT27			CYB5R4			NDUFA10		NAPSB	MSL3
	TSSC4			YTHDF2			TNK1		NCOA2	TAF1B
	PCM1			SNX1			PLIN3		NDRG2	SMAD6
	ICAM1			DYNLRB2			HSD17B12		NKX6-2	RAB19
	ZNF76			IKZF2			CHCHD2		NNAT	GGCX
	MYH10			TUBE1			PISD		NTSR2	RABGAP1L
	ZNF839			ZNF44			CPQ		NXNL1	RAP2B
	SFSWAP			FZR1			INSIG2		PARD6G	AP5M1
	XXYLT1			ZNF12			COPG1		PCP4L1	COG2
	YIF1B			TNFRSF25			COPS4		PDE9A	RAD54L2
	GIT1			AKAP11			IRAK4		PIK3C3	FBXO25
	RPRD1B			NAGPA			TELO2		PIP5KL1	ARRDC4
	SPSB2			FAM8A1			AIG1		PLA2G4F	PREPL
	CCDC130			BRE			RWDD1		POLE2	MPZL1
	ZNF710			CA4			UBAC1		POLRMT	MOSPD1
	SMIM5			CCNE1			SDF4		PPM1L	RFC3
	SLC30A5			MSI2			ACRC		PRIMA1	JMY
	FBXL6			AMOTL2			DNTTIP1		PRRT4	CA11
	LDOC1L			ZNF580			PIAS1		RAB33A	ANKRD13A
	ASPSCR1			BSG			BRD8		RANBP6	DNM1L
	RIPK1			TRIP4			TAOK2		RARRES2	VAPA
	KIF3B			CPSF2			TUBGCP5		RASGEF1A	NEK4
	PRPF38B			VPS28			CCDC7		RHEBL1	DDX51
	PLOD1			CPSF3			PCMTD1		RND2	IDE
	SECTM1			PRKAG2			SDHD		RTN2	ZNF280D
	SLC6A6			PACSIN3			LSM7		RXRG	FAM46C
	TIGD5			DDX41			NT5C3B		S100A4	ZBTB48
	DNAL4			ACOT2			ZNF410		SAAL1	CAP2
	VAC14			PRPF4			ICA1		SAMD9	SIX1
	UBAP1			MAN1B1			KPNB1		SCGB1D2	KRR1
	WDSUB1			DBR1			SEC16A		SCNN1B	KCTD1
	FBXW7			MOB3A			C1orf27		SEMA4G	TAF9B
	KLC4			PRRC1			NFIX		SFT2D2	ZNF786
	SUGP1			MEN1			SAR1B		SLC25A14	UBXN8
	RETSAT			FAM120AOS			KTN1		SNORD94	ORAI2
	PHF3			MTF2			TMEM109		SPDYC	C1orf27
	ZNF276			DYX1C1			ELOVL6		SSPO	LMO7
	NEDD4			TRIAP1			ASB8		STX1B	ZNF594
	ATRX			CTDSPL2			PTRHD1		THOP1	GHR
	PAN3			AP2A1			ZNF793		TLX1	COL4A3BP
	PHTF2			ISYNA1			MAP2		TMEM17	GLTSCR1L
	PPM1K			A1BG			PCDHAC1		TMEM176B	TWF1
	ORMDL1			ANKFY1			BBS2		TMEM185A	PSD
	EPS8			IRX4			PCDHA11		TRAM1L1	SRSF8
	PHF20L1			NUSAP1			NBR1		TRIM71	PMS1
	CCDC53			INPP5K			TERC		TRIM9	SOCS4
	CDR2L			DCDC2			GORASP1		TTC36	ZNF628
	ST7L			NIN			MRGBP		TULP1	RUFY2
	GNB5			MBNL1			KBTBD4		UPK1A	FUT11
	SBF1			PAK6			HOXA6		UTS2	TRPV4
	SMCHD1			BOD1L1			PCYOX1L		VSIG2	THSD4
	TEF			C11orf74			YIPF2		WTIP	KIAA0355
	FSTL3			MRPL10			MIS12		XKR9	FREM2
	RFX7			KDM5B			AUNIP		ZNF442	STK32C
	PEX26			YBEY			CCDC82		ZNF611	GABPB2
	AMMECR1L			NOL8			DNMT1			ZNF720
	AP4M1			TANGO2			DBNDD1			UBLCP1
	LRRC45			PDE12			CUEDC2			FGFR1OP
	TP53BP1			MSRB1			GGCT			USP37
	GJD3			SRRM2			LDHA			NBEA
	SMG9			GTF2IRD1			EIF2AK4			MFSD8
	HECTD4			ZNF274			PLIN5			SLIT1
	TMEM254			IPO11			NUP37			CDC42EP2
	POLR3D			PRODH			ERI3			MAMDC4
	CBL			ZNF160			PDCL3			TRAPPC11
	RALGAPB			USP6NL			KXD1			GSTCD
	WDR81			POLR3K			TSEN34			HSF2
	LIG1			WBP11			SECISBP2			FAM219A
	ABCF2			RSL24D1			NOC4L			PIBF1
	CD2AP			PRRX2			KDELR3			IFT81
	MPP7			DNAJB11			RRAGB			SMC5
	EPS15			LCMT1			PARP6			EXO5
	LARP6			RAB14			MRPS30			ADAMTS9
	BFAR			COPS7A			TMEM63B			IRAK4
	PCYT2			ELOVL1			ARL6IP4			TUBGCP5
	CACUL1			ATAD2B			OCRL			MRPL22
	SPATA2			CENPO			ADAMTS9			XRRA1
	TNFRSF25			CNOT7			WAC			DNAAF3
	LYSMD2			NBPF3			PHF21A			ARV1
	INTS10			RAB18			ALOX12P2			HHLA3
	MRPL2			OSBPL9			KLHL8			ABHD14A
	MAP3K2			GREB1			SSR1			ZNF816
	TSR1			MIRLET7DHG			ENOPH1			HEATR5A
	WDR37			RPL32			TMEM25			TMEM135
	EXOSC10			UTP18			MSANTD4			ORC3
	IPO7			WIPI2			NFX1			CCDC61
	RC3H1			TFB1M			MNX1			ACTR5
	SLC30A9			ZC3H14			SYTL3			CTSK
	TADA2B			UBE2J1			RNF7			ALDH7A1
	NAA50			RBMX2			ALDH7A1			RIN1
	ODF2			RDH11			ARMC10			ZNF77
	FAM217B			CACYBP			ANGPTL6			MMAA
	PDPR			METTL9			SETDB2			CYP2R1
	AGTRAP			PHF20L1			C1QTNF6			ANKRD44
	ZNF7			LUC7L2			TAF3			BCAP29
	MYO1D			MECR			DDTL			NCKAP5
	PC			NDUFAF1			KRCC1			OXNAD1
	SPAG9			ABHD5			UFM1			LRRC23
	ZMPSTE24			EXOSC1			TDP2			IFI44L
	MRPL17			ISOC1			ARMCX3			EGLN1
	KLF13			DERL2			FAM13B			AGBL2
	TESK2			TMED5			KDM3B			AP4S1
	GRAMD4			GMNN			TM2D2			ZC3HAV1L
	CCDC71			RMDN1			AGAP3			PCDHGB1
	MMS19			TRAPPC12			KCTD10			MCTS1
	EAF1			MRPS16			GSG2			PLCB1
	UBQLN4			ERV3-1			PCBP2			ZNF234
	NCAPH2			GLRX2			PTBP1			ABCC8
	PAPD4			FIS1			EIF4H			GSG2
	FAM193A			PAM16			TRAPPC6A			IGSF9B
	FOXP4			PRDM2			TMUB2			FADS2
	HKR1			YPEL5			ALG12			ZNF57
	CSNK1G1			SLC30A5			MLPH			SNAPC1
	TTC8			MRPL48			METTL22			ANKEF1
	COPS7B			PPIL1			NDUFAF5			ZNF283
	ZNF789			IFRD1			MAPKAP1			IFNB1
	TTF2			MRPL11			CNPY3			ZSCAN20
	SLC6A9			CDK5RAP1			ZSCAN12			FBXO36
	CKAP2			GLOD4			HEXA			HSD17B11
	C5orf51			ZNF589			PDDC1			UGGT2
	NFKBIB			STYXL1			TBC1D7			FAM76A
	DPH2			ATRAID			SETD9			SCML2
	WNT7B			MRPS33			TTC9C			IKBIP
	TXNRD2			GOLT1B			GLTSCR1L			CEP57L1
	CAPN7			DESI2			EXOC7			PKP2
	BTBD1			DALRD3			MAPK8			HDAC4
	DOLPP1			RPL26L1			SCAND1			IL15
	GPT2			GINS2			STK32C			ZRANB3
	PIK3R1			MPC1			PRRT3			KDM8
	KCTD20			FASTKD1			CEND1			SETDB2
	TLK1			NSF			C1RL			MED12L
	SS18			BECN1			DOK1			ZNF169
	PROCR			ZSCAN5A			C3orf14			RANGRF
	TMEM164			NOL3			RSF1			GAS2L3
	GALNT12			MFSD9			CD320			RASGRP3
	IRGQ			CHAMP1			ECSIT			ANKRD6
	RTEL1			PPP6R3			CBX3			SERAC1
	PMM2			NDUFA10			TADA2A			GPCPD1
	DOK7			TNK1			ABCC10			UBE2NL
	AHRR			GPATCH2L			ERGIC2			HRH2
	HSD17B14			PLIN3			GMPR2			SMIM8
	HOMER3			FLNB			NFS1			TRAF1
	R3HCC1			CDK10			NADK			CABYR
	SARS2			IFT122			ZCCHC17			MBOAT1
	CNTROB			HSD17B12			PTPRK			EPAS1
	KIAA1429			TRAPPC4			NFATC4			ADPRM
	ENOSF1			ZBTB24			EXOC6			CEP41
	FOXRED1			COQ7			ZNF581			ZNF566
	RPS6KA4			CHCHD2			SIRT7			LCA5L
	CLASP1			INSIG2			SIRT6			FGF13
	EFR3B			RLIM			CA11			NFATC4
	YARS			ASB3			GALNT2			CEND1
	MSMP			NUB1			ATP8A2			CCDC7
	KLHL21			TELO2			BET1L			ABCC4
	XPNPEP1			AIG1			EIF2D			KIF15
	MPP5			SCFD1			NETO2			SLC35G6
	AGAP1			RWDD1			VPS13A			MAP7D3
	NR2C1			UBAC1			CORO7			MATN3
	PQLC1			ACRC			EPM2A			FAM189A1
	SEMA4A			CERCAM			MAP1LC3B2			TEX19
	FBXO41			OAZ3			MYSM1			TTC25
	LTBP1			DNTTIP1			RTN4			SLC37A2
	SNORA74B			PIAS1			NCK1			EAF2
	KIAA1109			TOP1MT			GIT1			NRIP2
	SLC22A23			NOL7			ARSA			TMPRSS4
	PUS1			HSPA12B			ENO1			ASB14
	KIAA0141			BRD8			COMMD4			CDC14A
	CCDC94			RAB4B			ZNF343			METTL21A
	SNX11			TAOK2			GALC			KCNQ1
	PMPCB			STK11IP			WASF2			CCDC112
	AKAP10			ESCO1			PPIP5K1			KLHDC1
	HSF4			PWWP2A			FBXO11			RTKN2
	FBXW9			RHPN1			MBOAT7			KIF14
	CMYA5			PCMTD1			GTF3C2			GTF2H5
	C1orf210			SDHD			GLUD1			ZNF221
	PJA1			NT5C3B			C1D			KCNIP4
	ASCC1			ATG4A			GLIS2			PITX2
	PHF12			CCL28			RPE			ADAMTS7
	SHROOM2			MPPE1			ZDHHC3			KLF7
	AP2A2			ZNF410			NAA35			EFCAB6
	KIF2A			B4GALNT1			VPS26A			SASS6
	ZNF33A			KPNB1			TIMMDC1			PILRA
	CREM			SEC16A			TAF1B			DERL3
	KCTD11			LTBP3			EIF4G3			AVIL
	OLFM3			RAD51			ASAP1			HRC
	SPEN			HEBP2			CLIP1			FLRT3
	TAF6L			DLC1			MZB1			C1RL
	CDK13			MGA			LARS			KCNAB3
	NUP98			SLC37A4			TMEM138			FAM83E
	PIP5K1C			AKR1E2			COPB1			CHRNA10
	CES2			TRIM17			EMC4			AIFM1
	NFX1			SAR1B			IDE			FIBP
	IFNGR1			TRAF3IP2			COPZ2			EBAG9
	SMURF1			ASB8			GTSE1			PTTG1
	TPGS1			PTRHD1			PIGP			SOCS6
	TMEM161A			LOC100133315			NF2			APRT
	OLA1			TUFT1			TRMT112			CTC1
	BICD2			ZNF793			FOXJ3			PCGF5
	MBNL2			PCDHA6			RTFDC1			KIF18B
	EDEM2			MAP2			UFC1			POLD3
	MKL1			PCDHAC2			CHMP5			TXNDC12
	FGFR1			PCDHA11			ZNF154			FAM177A1
	GPATCH8			NBR1			ACY1			TFDP2
	SNX8			PCDHA13			MZT2A			AP2B1
	TCERG1			PCDHA12			DCTN3			TM9SF1
	SPIN3			PCDHA7			DCAF10			TPGS2
	SENP6			GORASP1			ENTPD5			RMND1
	SLC9A8			SH3KBP1			MRPS11			AKIP1
	TRIM62			MRGBP			CRELD2			PIGG
	TANGO2			KBTBD4			RBM42			ANAPC5
	EXT1			PCYOX1L			FBXL15			RAB4A
	TOR2A			MIS12			BRCC3			STK25
	DAGLB			DDX50			IRX3			SH3GLB1
	PARP4			DNMT1			ZNF557			TRIM13
	TUT1			KDELC1			DHRS11			MID2
	ZKSCAN8			DBNDD1			DGCR8			ZMYM1
	GALNT2			ZNF503			FKRP			ZNF830
	THAP3			SCNM1			ATP5G3			GADD45GIP1
	RNF6			CUEDC2			TMEM243			TGFBRAP1
	ATG16L1			GGCT			PLEKHF1			CHD1L
	NFS1			GID4			TAF1A			WDTC1
	OGFOD2			TMEM106C			CKMT1A			ERVK13-1
	POFUT1			LDHA			RBM15			CD151
	COPG2			NUP37			IDH3B			RNF41
	PLD2			AHNAK			MRPL51			BNIP2
	CACYBP			PDCL3			TMEM216			SDCBP2-AS1
	SIPA1L3			KXD1			RANGRF			BCR
	PEX19			NABP2			RNF181			LOXL1-AS1
	COPS2			TSEN34			JKAMP			ARHGAP1
	FAM192A			SECISBP2			COX16			ACTL6A
	GTF2A1			TMEM38A			ORMDL1			ACVR1B
	PDLIM2			PVRIG			PAIP2			ASNA1
	UHRF1BP1			METTL16			PDZD11			ACP1
	YTHDF3			ASPSCR1			PPHLN1			BANP
	NCOA1			KDELR3			SIAH1			MRPL9
	NUDCD3			PARP6			ARPC4-TTLL3			ZCCHC10
	FBXL18			ARL6			WDR33			PRKCSH
	LRRC8E			CRNKL1			NOX5			MPI
	MRRF			ZAK			LRFN3			TMED3
	CCDC125			THEM6			PI4KB			ANKRD42
	SEC24B			MRPS30			FAM65A			CAPZB
	KDM4B			TMEM63B			CYP2R1			DENND1B
	CEPT1			GDE1			FYCO1			LIMA1
	RPRD1A			ARL6IP4			RNF214			DBN1
	CAMSAP1			OCRL			RBBP7			DAP
	CXCL12			RARS2			FSCN2			DDX11
	DTNB			SPG21			IFT81			CRABP1
	ZNF584			PAXBP1			NRIP2			CSK
	CIDEB			PHF21A			MYH14			CREBBP
	SCMH1			SYT12			RBM4B			COX6C
	FAM20B			ALOX12P2			L3MBTL2			COPA
	MKRN2			KLHL8			TRAPPC9			SWSAP1
	CAPG			SSR1			ROCK2			ZNF74
	MNT			ENOPH1			SREK1			SSBP1
	DTNBP1			TMEM25			FAM103A1			STX18
	IDNK			MSANTD4			PARP9			SLC12A2
	SOWAHC			NFX1			SESN2			B9D1
	RANBP10			TMEM14C			CD99L2			CTNND1
	FBXO11			RNF7			LRRC28			EIF4EBP2
	BAIAP2L1			MRPS5			ZNF225			SETDB1
	SMAP2			MRPS21			RPS6KA1			LONP1
	AP4E1			DNAL1			HUWE1			ATP5A1
	ANKS1A			ROPN1L			WDR35			TGOLN2
	SUCLG2			TAF3			NDUFS7			KAT5
	KDM2B			REPS1			TCEAL1			ACOX1
	SLC39A11			DDT			DSC2			INPP4A
	INPP4B			SAFB			COG3			AP2M1
	SNAP23			GCFC2			GMEB1			AP2S1
	CBFA2T2			TBC1D10A			TCEAL8			SPECC1
	RASA1			ARMCX3			TTC25			TP53I3
	CENPO			FAM13B			NUF2			DCTN1
	SP2			KDM3B			RDH13			COX8A
	PTPN13			TM2D2			PAFAH1B3			CHAC2
	TMEM41B			PRSS27			AIFM2			DYRK1A
	RALBP1			AGAP3			CTSC			FKBP1B
	DIP2B			KCTD10			AZIN1			PAF1
	SMARCA2			PCBP2			PPIL2			UHRF2
	CREBRF			PTBP1			LEPROT			CMPK1
	ARID1B			EIF4H			LEPR			PCCB
	ARID2			CHAC1			MKI67			DBI
	VPS13C			TMUB2			MSANTD2			AIP
	FAR1			ALG12			SAP30L			USP3
	CCDC93			SLC25A23			ZNF322			USP39
	ZNF324			MLPH			SARS2			ECI1
	TCEB3			METTL22			TMEM204			GOLGA7
	IL13RA1			APOO			CCNC			ASNS
	OCRL			MAPKAP1			RPAP3			NSMF
	REEP3			TAF1D			ARHGAP10			RABEPK
	BEND7			WDR18			ARHGEF12			EXT2
	RASSF1			DOCK9			MAP7			ARID4B
	VLDLR			CNPY3			TNFSF13			ZNF182
	CTPS1			SNW1			TFPT			CPNE1
	LGALS8			MAPK8IP3			TANGO6			TMEM185A
	UBE2E2			OPRL1			FBXL6			ILF3
	TMTC3			GUSB			RPS9			POU2F1
	PNPLA6			HEXA			PCDHA4			RAB27B
	COL5A1			PDDC1			CHPF			OAZ1
	FAM174A			DHRS2			CDC73			PRKAR2A
	FNIP1			TMEM241			URI1			PRKAG1
	ANAPC7			CIDEB			MAP7D3			NDUFB7
	SLC16A3			TBC1D7			USB1			SP100
	MAGI1			LACE1			FAM168B			IDH3G
	S100PBP			TTC9C			SRD5A3			OGFOD3
	ECHDC1			MRPL18			SH3BP2			ZADH2
	ZSCAN29			EXOC7			TNFAIP8L2			GPS1
	TCF12			ZNF197			OCEL1			PSMD13
	CPLX1			ADPRH			MPZL1			DHDDS
	C19orf25			SCAND1			F11R			MTMR2
	MRS2			FARS2			RWDD2B			LNPEP
	TECPR2			BFAR			KLHL36			UXT
	PLEKHG2			GOLM1			HPS6			RSPH3
	STK24			MTR			ALG9			ANAPC11
	SLC7A1			DNAJC27			ZNF408			FAM104A
	CCDC90B			DOK1			ARMC5			PDE6D
	ZNF766			HERC6			GSTCD			SNAPIN
	CENPN			NUP62			EHMT1			MED24
	CDC73			TM7SF3			PTCD2			MTCH1
	MIB2			RAB6B			DHRS12			MYL6
	ZXDC			CD320			ASB7			PYCR2
	CDK1			ZNF184			ATP6V0C			MTIF2
	ZC3H7A			ECSIT			ISOC2			ZNF32
	GALE			CBX3			TXNDC15			MAGED1
	FBRSL1			ABCC10			MPST			LTA4H
	RNF214			GMPR2			KRIT1			DHPS
	PRKDC			C14orf80			RPS19			CDC42SE1
	DUSP8			SMAP2			THRAP3			PPP1R12C
	DCAF6			NADK			GINS3			GNAS
	FNBP1L			ZCCHC17			SLC25A19			EXOSC9
	NEURL1B			MRPL27			GLYR1			AP3B1
	ARRB2			PTPRK			TMED2			HDLBP
	ACP5			EXOC6			SH3BGRL3			EIF2B4
	ST8SIA6			ZNF581			WDPCP			NEDD4L
	ELAVL1			ECHDC2			PIAS2			TPD52L2
	FUK			SIRT6			SNRPC			APOE
	PLAUR			GALNT2			SHPRH			CSNK1A1
	MAST3			ATP8A2			UROS			NUDT9
	VRK3			ING2			PDPK1			YIPF5
	NTAN1			RAB8B			CDK13			COPZ1
	ANKRD23			WASF3			RHOC			ACHE
	POLR3H			EIF2D			ZBP1			TEP1
	MBOAT2			NETO2			SLC9A5			CLTA
	TTC38			CORO7			TIAL1			OS9
	ZNF688			NCK1			DYNC1LI2			OPA3
	EXD2			CBWD6			RBCK1			SF3B1
	CRYZ			SORBS3			HNRNPA2B1			CDK2AP2
	TULP4			ARSA			SNAP47			KHDRBS1
	MUL1			PIGO			KIF18A			CYB561
	UBR3			COMMD4			ZNF808			PFKFB1
	VPS41			ZNF343			LOC389765			SERPINB6
	SIGMAR1			GORASP2			AP1AR			DPP3
	ARHGAP17			FIGN			TTLL7			MXI1
	BBS1			WASF2			WDR13			RBMX
	URGCP			ZNF778			FBXW4			IL17RA
	CCDC170			UBL5			QTRT1			EEF1D
	ZNF514			FAM134A			ZNF419			ZFP41
	SCAF4			FBXO11			HNRNPM			PCED1A
	TOP3B			DERL1			TTC14			RAP2C
	CLDN23			PHF23			KDM5A			ATXN2L
	MBD2			GTF3C2			SOAT1			CHMP3
	MUM1			GLUD1			CCDC51			PPP3CB
	TP53RK			TPD52L1			ZYG11B			ZNF512
	ANKRD28			C1D			BBS1			ERP29
	MAP2K4			EAPP			DNAJC7			MSMO1
	KIF5C			GLIS2			KCTD17			ASXL1
	JMJD1C			RPE			TEFM			GRB2
	KIF13B			ADAM11			VPS37B			ZNF780B
	ARRB1			ZDHHC3			TBL1XR1			ALDH18A1
	GLCE			YY1AP1			SDHAF1			MAEA
	DCUN1D4			MEA1			SETD6			GOPC
	PTGR2			NAA35			SLC35E1			HPS1
	ALDH5A1			NQO2			NT5C			AACS
	BCL2			VPS26A			NAA60			MRPS34
	GTF2E1			SLC30A3			CRK			DDRGK1
	DST			TIMMDC1			ACTR5			STAG3L4
	MSL2			NUBPL			PYROXD1			NPAS3
	EARS2			EIF4G3			MFGE8			ATP7B
	LMBR1L			CLIP1			RNF31			BCKDHA
	UBAP2			TMEM9			ZNF672			BTBD11
	ALOX15			MZB1			LPCAT1			ZFR
	DDX19A			LARS			TGS1			TRIM8
	NAA15			CXXC5			BORA			RWDD2A
	INIP			DTYMK			NEK11			DLD
	PDCD11			TMEM41B			THSD4			ZNF783
	LANCL2			DTL			CBLL1			EMC1
	C5orf24			TMEM8B			RPAP2			TTC19
	ENTPD5			COPB1			CPSF7			UBE3A
	FYCO1			EMC4			PHKA2-AS1			HP1BP3
	RASSF8			OGDH			LOC100294362			CNOT1
	DNASE1L2			RTEL1			WDR83			DCXR
	RFK			TUBG2			KIAA0100			SNX1
	TRAF5			LUC7L3			PAN3-AS1			DYNLRB2
	EPB41L2			CCT2			USPL1			FZR1
	REV1			RBM4			HNRNPD			ZNF12
	ZBTB40			RNF141			COL4A3BP			AKAP11
	PDS5B			TRMT112			PANK2			BRE
	KRIT1			FOXJ3			GTPBP10			CCNE1
	ADSS			RTFDC1			DOHH			AMOTL2
	MBTPS2			UFC1			SRD5A1			ZNF580
	EPB41L1			CHMP5			SLC25A16			BSG
	SPIRE1			MORC4			MLLT10			VPS28
	ROCK1			ACY1			ALG13			PRKAG2
	STK35			MZT2A			RBM41			DDX41
	PDK3			DCTN3			SEC24B			ACOT2
	TSC1			ZNF530			EPHX3			MAN1B1
	FAM120B			PDSS1			AGBL2			DBR1
	MFHAS1			MRPS11			CLUAP1			PRRC1
	ZNF397			C19orf57			KDM8			MEN1
	NFIX			RBM42			PIP4K2C			FAM120AOS
	AMOTL1			ZNF576			NAA40			CTDSPL2
	MIB1			FBXL15			TCP11L1			AP2A1
	CUL5			LRRC6			CEP63			A1BG
	STON2			ATAD1			CEP170			ANKFY1
	SMC3			SLC27A3			NAAA			NUSAP1
	BTAF1			FSD1			FUT11			INPP5K
	SMPD1			ATP5G3			RUFY2			NIN
	FRMD6			TMEM243			ZNF596			MRPL10
	BOD1L1			MFSD11			PSPC1			KDM5B
	PPP4R1			GNPTAB			ZNF205			SRRM2
	FAM20C			DMKN			SCRN1			ZNF274
	ABI2			CKMT1A			AFMID			IPO11
	ECT2			RBM15			GSDMB			ZNF160
	RBAK			ZNF821			CARHSP1			WBP11
	ASB7			IDH3B			SLC35A2			RSL24D1
	L3MBTL2			MRPL37			SMIM8			PRRX2
	RBM12B			MRPL51			NF1			RAB14
	RNF14			RNF181			PSAP			COPS7A
	IFT140			CCDC174			TRAPPC5			CNOT7
	SHOC2			COX16			RAD51D			NBPF3
	RANBP3			PAIP2			CHD8			MIRLET7DHG
	IL1RAP			PDZD11			URGCP			RPL32
	MMP17			VTA1			AGAP6			WIPI2
	OSBPL10			TMEM69			FAM228B			UBE2J1
	STAT6			SHISA5			CCDC117			RBMX2
	FUZ			ARPC4-TTLL3			UBXN2B			RDH11
	ZNF746			WDR33			SIPA1L1			METTL9
	PSD3			ARPC4			CCSER2			LUC7L2
	CHAF1B			NOX5			VPS37D			NDUFAF1
	GUSBP11			CUL2			IFT27			EXOSC1
	CNPY4			ZNF789			ELP3			DERL2
	PALM3			WDR25			PPP2R1A			RMDN1
	R3HDM1			FYCO1			LRR1			TRAPPC12
	C1orf159			RNF214			PCSK6			MRPS16
	H6PD			SPPL2B			DCAF5			ERV3-1
	NINL			FSCN2			PLD3			FIS1
	CDC20			TRPT1			PPP2R2D			PAM16
	SMYD5			NIPAL2			NDUFA5			GLOD4
	DNAJA4			ESPN			COASY			STYXL1
	TROAP			MYH14			TYW1B			ATRAID
	SNORA74A			RBM4B			FEZ2			RPL26L1
	MGAT5			LONP2			NCBP2			CHAMP1
	RNF123			MARVELD1			TMEM205			NDUFA10
	NLRX1			ATG10			MSL2			TNK1
	KAT6A			L3MBTL2			DIAPH3			PLIN3
	RBM28			NUDT5			NONO			CHCHD2
	WDR11			TRAPPC9			CHM			AIG1
	MEX3A			SREK1			SETD7			RWDD1
	RELB			PARL			SPRED3			UBAC1
	ASH2L			IRF2BPL			ZBTB8A			ACRC
	NDFIP2			SESN2			ERBB4			DNTTIP1
	PRDM2			RPS6KL1			RCHY1			PIAS1
	BBS4			PCDHA3			FAM24B			BRD8
	ZNF142			PGS1			CRTC3			TAOK2
	ILKAP			HUWE1			HNRNPA1			PCMTD1
	GFM2			ZNF473			STMN1			SDHD
	PLEKHB1			WDR35			SPECC1L			NT5C3B
	NAA30			NOTCH2			SNRNP27			ZNF410
	POMT2			DSC2			RTEL1-TNFRSF6B			KPNB1
	INPP5A			ARHGAP17			MBNL3			SEC16A
	TIMELESS			THAP2			LOC728730			SAR1B
	IKBKAP			COG3			LOC653160			ASB8
	ATP11A			CCM2			IL17RC			PTRHD1
	DIS3L			AMMECR1L			ZNF321P			NBR1
	ZNF211			GMEB1			NPPA-AS1			GORASP1
	TBC1D22A			MARK4			NPHP3-ACAD11			MRGBP
	GCA			LDB1			IL15			KBTBD4
	SIAH1			SPIN2B			CES5AP1			PCYOX1L
	PLAGL2			TCEAL8			REEP3			DNMT1
	NFYB			PCDHA1			DLX1			CUEDC2
	MAGEH1			FAM126B			PIN4			GGCT
	KDM5A			AIF1L			SRPX			LDHA
	KIAA0895L			RDH13			RPS6KA4			NUP37
	AIFM2			PAFAH1B3			NDUFB8			PDCL3
	CUEDC1			AIFM2			TAC4			KXD1
	RAP1GAP2			PEMT			NKIRAS2			TSEN34
	ARID4A			PPIL2			BMP1			SECISBP2
	MED20			LEPROT			TCEAL3			KDELR3
	MCAT			NME2			AP4E1			PARP6
	JAG2			FBXO17			LSM4			MRPS30
	USP54			SLC12A4			UBE2Q2			TMEM63B
	SLC7A6			VEPH1			SLC39A9			ARL6IP4
	MAPK11			OGFOD2			SH2B3			PHF21A
	ARMC8			MSANTD2			DBNL			ALOX12P2
	FBXO27			SAP30L			POLM			KLHL8
	SETD4			HECTD3			MAPK10			SSR1
	NME6			CCNC			NDUFA2			ENOPH1
	MRPL35			TMEM136			KRT8			MSANTD4
	CHD9			ARHGAP10			PDZD9			RNF7
	CHDH			DHX40			SEC24D			TAF3
	SAMD12			ZCCHC6			RRM1			ARMCX3
	PREP			MAP7			MIR326			KDM3B
	FNBP1			TNFSF13			FMR1			KCTD10
	RACGAP1			NAA16			APTX			PCBP2
	MAP3K8			TANGO6			DDX51			PTBP1
	UCHL5			ZNF638			DPH5			EIF4H
	ACOT4			FAM118B			ZNF75A			TMUB2
	WDR3			CERS4			VWA9			ALG12
	TMEM234			RPS9			RHOU			MLPH
	TYMP			CEP97			HNRNPUL2-BSCL2			METTL22
	RUFY3			CARS2			TMEM231			MAPKAP1
	ZNF576			THRB			LIPT1			CNPY3
	ALKBH1			CDC73			ZNF586			HEXA
	RILPL1			NKAP			P2RX5-TAX1BP3			PDDC1
	PIGL			TTC13			SUCLG2			TBC1D7
	DHX33			ATP13A3			TSR3			TTC9C
	ZNF780A			GCC1			SCML2			EXOC7
	ZNF778			EXOC6B			ZNF429			SCAND1
	PXMP4			FAM168B			BCLAF1			DOK1
	ZMYND15			RNF24			VAMP4			CD320
	BIRC5			TTC26			SRD5A3-AS1			CBX3
	SLC17A5			TMEM53			ZDHHC12			ABCC10
	VPS53			ARMC7			ATP5S			GMPR2
	MYEF2			HTRA2			ATP5L			NADK
	DLX4			GALNT14			HMGN1			ZCCHC17
	FGFR1OP2			SNRNP25			HDAC1			PTPRK
	SLMAP			RNASEH2B			CDK16			ZNF581
	KLHL17			HMBOX1			CDK17			SIRT6
	RHOT1			F11R			ZNF584			ATP8A2
	PCDH10			ACBD4			CWC27			EIF2D
	RUNDC1			CLMN			ATP5I			CORO7
	E2F1			OXR1			MECP2			NCK1
	TRAK2			TLE6			RAB5B			ARSA
	SVIP			EHMT1			NDUFS4			COMMD4
	SLC29A4			NRGN			MRPL49			ZNF343
	VAV3			ZNF750			SEC24C			WASF2
	CCNT2			ASB7			DKFZP434I0714			GTF3C2
	GOLIM4			C1orf115			DTD1			GLUD1
	MOB3A			ATP6V0C			TAF6			C1D
	KDM6A			KATNBL1			DDX1			GLIS2
	ABCB6			ELMO3			A4GALT			RPE
	ZFX			RABL6			DOCK3			ZDHHC3
	PBRM1			FXR1			MIR302C			NAA35
	UGGT1			MPST			MTOR			VPS26A
	ZNF837			RPS19			PAPOLA			TIMMDC1
	SRGAP2			GINS3			MTFR1			EIF4G3
	ASCC3			SLC25A19			FPGS			CLIP1
	GRB14			IFITM10			PDIA4			MZB1
	ADARB1			POLG			PRDX6			LARS
	MIER3			TNNT1			NDUFA8			COPB1
	CENPM			GLYR1			HSH2D			EMC4
	BLOC1S6			DIO1			CYB561D2			TRMT112
	NDE1			CDK7			GLG1			FOXJ3
	TMEM106B			ZSWIM7			TROVE2			RTFDC1
	ZNF174			PIAS2			PRDX3			UFC1
	LTN1			NUDT15			PREPL			CHMP5
	TSTD2			SNRPC			G6PD			ACY1
	GZF1			SHPRH			TMCO1			MZT2A
	STK11IP			TXNDC11			TRPV4			DCTN3
	DUS3L			UROS			NPRL3			MRPS11
	MAP3K6			PDPK1			RBM23			RBM42
	IMPAD1			CDK13			ATP6V1G1			FBXL15
	GDAP2			RHOC			ATP5J2			ATP5G3
	MYT1			NECAB3			SEC22B			TMEM243
	YBEY			TIAL1			C14orf2			CKMT1A
	C6orf120			DYNC1LI2			CLOCK			RBM15
	HOOK1			RBCK1			TMEM59			IDH3B
	THBD			HNRNPA2B1			HHAT			MRPL51
	SEC23IP			SNAP47			SPTLC2			RNF181
	DLX1			NRSN2			VPS4B			COX16
	PHLPP2			HDHD3			SCAMP1			PAIP2
	NETO2			KIF18A			CIR1			PDZD11
	EHD3			PITPNM3			GAK			ARPC4-TTLL3
	NOL10			TASP1			RASAL2			WDR33
	C3orf38			SUPV3L1			FXR2			NOX5
	CLCF1			SHMT2			ZMAT5			FSCN2
	MATK			ZFAND1			CLTC			RBM4B
	LMF1			WDR13			MRPL40			TRAPPC9
	IRS2			AAMDC			NTN1			SESN2
	APBB3			MAP2K4P1			ABCG2			HUWE1
	POLR3A			FBXW4			SAE1			WDR35
	KLHL9			QTRT1			MED26			DSC2
	COBLL1			ECHDC3			TM9SF2			COG3
	ARRDC3			FAHD1			NMT2			TCEAL8
	NUMBL			CLIP4			STOML1			PAFAH1B3
	MED9			HNRNPM			CIAO1			LEPROT
	FBXW8			CCT7			LPXN			MSANTD2
	ZNF121			PLEKHG5			PEX16			SAP30L
	REC8			CCDC51			SYMPK			CCNC
	RPF1			ZMAT4			ARHGAP29			ARHGAP10
	ZNF398			BBS1			INTS9			MAP7
	DCLRE1C			NARS2			STK36			TNFSF13
	FA2H			PALB2			NELL2			TANGO6
	C5AR2			KCTD17			SEZ6L2			RPS9
	DSG2			TBC1D17			FARP1			FAM168B
	R3HCC1L			TEFM			MKRN1			F11R
	NAT6			PPCS			C4orf3			ATP6V0C
	RRP12			NPEPL1			CLCN3			MPST
	AP3M1			NGDN			GUF1			RPS19
	RNF166			SNX21			SCAF11			GINS3
	OSBPL8			ZNF768			NEMF			SLC25A19
	VPS36			SUV39H2			HGS			GLYR1
	POP4			SETD6			RABEP1			SNRPC
	RNF111			TCEAL4			KCNAB3			SHPRH
	MAP3K7			MAPT			SLC33A1			UROS
	ITPKB			SLC35E1			VAPB			PDPK1
	ERMAP			NT5C			MTA2			RHOC
	OSGIN2			NUP85			NCOA6			TIAL1
	RBM45			ZNF613			BUB3			DYNC1LI2
	QSER1			ADD3			MAP3K13			RBCK1
	EXD3			TMC7			ATXN7L1			HNRNPA2B1
	TSPAN6			AGO3			STK17A			SNAP47
	SPCS2			MAGIX			CEP152			KIF18A
	TECPR1			MFGE8			DLG5			WDR13
	GPR39			UBE2T			CCPG1			FBXW4
	SNRK			IBA57			TESK1			QTRT1
	FICD			PODNL1			VAMP3			HNRNPM
	2002-03-01			HDAC11			SNAP29			KCTD17
	GAS6			CAAP1			FHOD1			TEFM
	KDELC2			DENND1A			CNOT8			SETD6
	CLEC16A			RNF31			NREP			SLC35E1
	MSL3			MCMBP			ZNHIT3			NT5C
	NSUN4			TGS1			SRSF11			MFGE8
	TAF1B			C11orf63			COPB2			RNF31
	SMAD6			NEK11			BCL7C			TGS1
	IKBKB			NUDT18			MATR3			NEK11
	SP6			CBLL1			PTPMT1			CBLL1
	ZNF784			RPAP2			KIF3B			RPAP2
	SH2D4A			CPSF7			PPIG			WDR83
	NR1H3			RNF208			UBE4A			KIAA0100
	C9orf106			EMC6			POGZ			PAN3-AS1
	MZT1			RAB33B			SPOPL			HNRNPD
	DDX28			FOXO4			COG2			PANK2
	USP35			KCTD18			SCRN2			MLLT10
	PPCDC			WDR83			ANKRD30B			ALG13
	ITGB1BP1			KIAA0100			CCDC153			NAA40
	RAB19			PAN3-AS1			NEK6			NAAA
	CAPN10			USPL1			ZNF383			ZNF596
	CLIP2			DEGS1			TIGD6			PSPC1
	DSTYK			PARG			HINFP			ZNF205
	RIPK2			PLAA			ZSCAN31			AFMID
	SDAD1			SHOC2			APLP2			CARHSP1
	FNDC3A			DUSP19			UBA52			PSAP
	GCAT			HNRNPD			WDR70			CHD8
	HDHD2			PANK2			NUDT14			AGAP6
	MED18			GTPBP10			MIR3619			UBXN2B
	TM4SF1			KATNAL2			XPC			CCSER2
	NFYA			MLLT10			TSN			VPS37D
	CAPS			ALG13			TRAF6			PPP2R1A
	PSEN2			SEC24B			TAF1			LRR1
	MTRR			FIGNL1			SULT2B1			PLD3
	LRRC8D			PEAK1			STAU1			NDUFA5
	GGCX			NHEJ1			RAP1A			COASY
	WDR41			ZNF552			MTMR6			NCBP2
	RABGAP1L			CAMKMT			NDUFA11			TMEM205
	NAA25			METTL8			IGF1R			DIAPH3
	ING5			NAA40			HSCB			SPRED3
	RAP2B			RBM17			ARFGAP1			ZBTB8A
	MTF1			ZDHHC7			CDC23			RCHY1
	AP5M1			NAAA			BAP1			SPECC1L
	COG2			ZNF596			LHPP			LOC653160
	RAD54L2			PSPC1			USP11			NDUFB8
	FBXO25			ZNF205			FAM188A			NKIRAS2
	KIAA2026			CENPA			CDK2AP1			TCEAL3
	ARRDC4			TFAP2A			COIL			LSM4
	PPOX			AFMID			FNBP4			UBE2Q2
	HSPA2			ABHD12			ZNF805			SH2B3
	NOL6			CARHSP1			COG6			DBNL
	ZNF558			ZNF565			DENND6B			MAPK10
	PREPL			CTDP1			IL18BP			NDUFA2
	HERC4			NUPR1			FAM50A			KRT8
	TRIT1			SLC12A6			MTMR4			RRM1
	SLC9A7			CAST			NMI			ZNF75A
	ZNF561			PSAP			MTA1			LIPT1
	DCAF16			CEBPG			FN1			ZNF586
	ASTL			RNASEK			ZNF566			VAMP4
	SERTAD2			RAD51D			DLEU7			ZDHHC12
	MRPS36			CHD8			PTPN3			ATP5S
	MAP4K3			AGAP6			RABL2A			ATP5L
	MPZL1			TTC4			ELF1			HMGN1
	MYB			UBXN2B			RPL3			HDAC1
	MIS12			CCSER2			ACADVL			CDK16
	MFSD6			SRGAP2			MOSPD1			CDK17
	SUV39H1			VPS37D			ARPP19			CWC27
	MAPKAPK3			WTH3DI			ALDH16A1			ATP5I
	MOSPD1			IFT27			OXSM			MECP2
	TMEM154			CDK11B			MPPED2			RAB5B
	STAG1			PPP2R1A			TAF1C			MRPL49
	HCN3			LRR1			CHTF8			DKFZP434I0714
	RFC3			PLD3			VGLL4			DTD1
	FAM13B			WBSCR22			RARA			DDX1
	JMY			SEC23IP			PLS1			DOCK3
	CA11			NDUFA5			PACS2			MTOR
	ANKRD13A			MINA			MRPL20			PAPOLA
	TTC9			LSS			ZFP1			MTFR1
	RAB20			ZNF880			SP110			PDIA4
	PLEKHA1			COASY			FOXK2			PRDX6
	DNM1L			LTBP4			HSF2			NDUFA8
	PLCH1			SCAF4			BDNF-AS			GLG1
	URB1			ZNF200			SLC43A2			TROVE2
	HARBI1			NCBP2			NSUN5P1			G6PD
	UPF3B			TGFBR1			DCTN5			TMCO1
	ANXA2P3			TMEM205			AP3S2			NPRL3
	VAPA			MSL2			NPHP4			RBM23
	SORL1			DIAPH3			PSPH			ATP6V1G1
	SLC46A3			SPRED3			RPS6KA3			ATP5J2
	TMEM128			CSTF2			RABGGTB			C14orf2
	BTRC			HECTD2			RAB27A			VPS4B
	NEK4			VOPP1			PKNOX1			CIR1
	KRBA1			ZNF506			SREBF2			GAK
	ARFGAP3			RAI2			SFSWAP			RASAL2
	ANKS3			ATG12			SMS			FXR2
	ADSSL1			ZBTB8A			SNRPD2			CLTC
	DDX51			PRH1-PRR4			NDUFA1			MRPL40
	TXLNG			XIAP			NDUFA3			SAE1
	IDE			RCHY1			NCAM2			STOML1
	THG1L			RRBP1			MGST3			CIAO1
	BTN2A2			FRS2			OVOL1			PEX16
	BPNT1			SPECC1L			NDUFB1			INTS9
	ARHGAP21			LOC100506730			NDUFB10			STK36
	UVSSA			ADAP1			PPP1R2			SEZ6L2
	NPHP3			LOC100233156			NDUFC2			FARP1
	DOCK9			LOC653160			NDUFS2			MKRN1
	ZNF280D			BACE1-AS			TAMM41			CLCN3
	KREMEN1			MTMR14			NDUFS3			NEMF
	GPATCH3			JRK			NDUFS5			SLC33A1
	RPP14			REEP3			NDUFS6			NCOA6
	C12orf65			DLX1			SYAP1			BUB3
	TIPIN			SRPX			CCDC59			MAP3K13
	FAM46C			ATP2B1			VEGFA			DLG5
	PKD2			FAM122B			SLBP			CCPG1
	ZBTB48			UHRF1BP1L			ADI1			VAMP3
	RICTOR			CCT6P3			GPS2			FHOD1
	CAP2			LCOR			FAM185A			NREP
	CATSPERG			NDUFB8			IKBKG			ZNHIT3
	DENND1A			ULK3			AKT2			SRSF11
	NDUFAF7			TLK2			KIAA1671			COPB2
	FAM160A1			DDX52			TMEM135			PTPMT1
	FZD7			NKIRAS2			BLOC1S1			PPIG
	SIRT5			TCEAL3			FOXRED1			UBE4A
	ONECUT1			FBXW4P1			INTS7			POGZ
	TMEM241			BLOC1S2			FCF1			SPOPL
	TRIM23			LSM4			FRG1			SCRN2
	ZNF621			UBE2Q2			GALNT3			ZNF383
	SIX1			LRRC8E			GOLGB1			TIGD6
	MEGF6			HDAC2			GOLGA2			HINFP
	ZNF644			PAM			TOLLIP			APLP2
	KRR1			ABTB1			CDC16			UBA52
	NME7			MFSD5			FKBP2			TAF1
	CSAD			ATP2B4			INTS6			STAU1
	FAM50B			SLC39A9			PDE6B			RAP1A
	APTX			SH2B3			SLC37A2			NDUFA11
	ZNF562			DBNL			EPRS			IGF1R
	SYNJ2			ACSF3			EPS8			HSCB
	BUB1			ZNF695			NUBP2			CDC23
	FAM175B			SON			LMO7			USP11
	SYK			FKBP9			ATP9B			COIL
	FAM161B			VKORC1L1			ENSA			DENND6B
	ATE1			SERHL2			EPHA4			FAM50A
	RSG1			AP3S1			UCHL5			MTA1
	EZH1			SWI5			DVL3			DLEU7
	C10orf12			SMPD1			EXOSC10			PTPN3
	IFT57			LZTS2			USP16			ELF1
	SIRT3			MAPK10			CNOT2			RPL3
	KCTD1			DBF4			ORC6			ACADVL
	KIAA1549			NDUFA2			2002-09-01			ARPP19
	LGALSL			KRT8			DFFB			OXSM
	SNX29			RRM1			CNIH4			CHTF8
	UACA			ATP6V1E2			MYO18A			MRPL20
	KPTN			FNTA			DDX20			SP110
	CCDC51			FMR1			AUP1			NSUN5P1
	KLRG2			EIF4G1			AKAP13			DCTN5
	MSRA			EPHX1			GPR180			PSPH
	ABCB7			APTX			SEC63			RABGGTB
	WWTR1			HIST2H2AB			POLG2			RAB27A
	PROSC			SH2B1			RNF2			PKNOX1
	MYO5A			RIF1			GALNT6			SREBF2
	EFCAB11			DPH5			CA5B			SNRPD2
	PIGH			ZNF75A			PMF1			NDUFA3
	ARL4C			STX16-NPEPL1			PDCD10			MGST3
	CLASP2			HOXA10			RNF139			OVOL1
	TAF9B			LIPT1			CHP1			NDUFB1
	ZNF507			STX16			XPOT			NDUFB10
	STAM			ZNF586			SYNRG			PPP1R2
	UTP6			SSR4			IGSF9B			NDUFS2
	TBC1D22B			PCMT1			DDX19B			TAMM41
	USP13			VAMP4			VPS45			NDUFS3
	MLLT3			PPP2R1B			PNKP			NDUFS5
	TEAD4			USP15			RLN2			NDUFS6
	PCDHA11			ZDHHC12			COPE			SYAP1
	BTBD10			ATP5S			STXBP3			CCDC59
	GEMIN5			ATP5L			STK38			SLBP
	ZNF786			MINOS1			EXOC3			AKT2
	RAD51D			HMGN1			MME			INTS7
	RAD54L			HDAC1			GABARAPL2			FCF1
	IPO9			CDK16			TWF2			FRG1
	SMAD2			CDK17			TIMM9			GALNT3
	GATA2			CWC27			TIMM8B			GOLGA2
	EEA1			JARID2			TIMM13			CDC16
	UBXN8			ATP5I			TIMM10			PDE6B
	NUP35			MECP2			DNAJC13			NUBP2
	VTI1A			CRYBB2P1			NPTN			ENSA
	NHLRC2			RAB5B			IFIT5			EPHA4
	ARHGEF25			LIMS1			RPL13A			DVL3
	NEURL2			RAB5C			SF3B3			USP16
	GPT			MYO6			USP21			CNOT2
	DIS3L2			TJP2			TNPO3			ORC6
	CYP4F11			MRPL49			TXN2			2002-09-01
	TBP			SEC24C			PRPF6			DFFB
	ORAI2			DKFZP434I0714			METTL6			CNIH4
	C1orf27			ZNF618			CISD3			DDX20
	LMO7			DTD1			ANP32E			AKAP13
	HIVEP2			TAF6			IQCB1			SEC63
	CRYZL1			ATP2C1			NAPA			GALNT6
	KIAA1468			PTER			MTFR1L			PDCD10
	HLCS			DDX1			S100A4			DDX19B
	LYRM2			AMDHD2			NDUFV1			PNKP
	ZNF606			SALL4			RPL10A			STK38
	NLK			DOCK3			TMF1			EXOC3
	ZNF277			SLC35E4			TCEB2			GABARAPL2
	ZNF594			MTOR			SSR3			TWF2
	TRIM7			PAPOLA			ITSN2			TIMM9
	FMNL1			MTFR1			RNF20			TIMM10
	OGFOD1			ANKRD11			GPCPD1			NPTN
	FBXO2			VPS9D1			YLPM1			RPL13A
	PAM			PDIA4			ZXDA			SF3B3
	HSPA13			PITPNM1			CSDE1			USP21
	THADA			PRDX6			CDC27			TNPO3
	MEGF8			ZNF529			VCP			TXN2
	GHR			ZNF85			UTRN			PRPF6
	ZBTB6			NDUFA8			NR1H2			METTL6
	MYNN			ESR1			ZNF81			CISD3
	MOB1B			RAP1GAP			ZNF41			ANP32E
	NUDT12			C6orf141			PKP3			IQCB1
	SYDE2			GATA2			ABCB8			NDUFV1
	SLC25A45			GLG1			WBP4			RPL10A
	DGKH			KPTN			UBTF			TMF1
	ZNF436			WIPF1			ZMYM6			TCEB2
	WARS2			TROVE2			SF3A2			SSR3
	TRNAU1AP			G6PD			NUP50			ITSN2
	NRBF2			TMCO1			ERLIN2			YLPM1
	COL4A3BP			TIMM50			C14orf1			ZXDA
	GLTSCR1L			GGA1			SNX15			CSDE1
	KIF16B			NDUFV3			NEK9			VCP
	KLHL11			NPRL3			RABL2B			NR1H2
	SUV39H2			RBM23			CCDC148			ZNF81
	FAM222B			ATP6V1G1			POLR3B			ZNF41
	MED4			ATP5J2			GANAB			ABCB8
	ATXN1			MRPL33			TTC22			UBTF
	TTC27			C14orf2			SLC44A3			ZMYM6
	RGL4			SPAG7			TEKT4P2			SF3A2
	TWF1			UGP2			RCC2			NUP50
	NICN1			HDGFRP2			KCTD1			ERLIN2
	SOCS5			NSUN4			ARTN			C14orf1
	EHBP1			MPDU1			TTF1			SNX15
	ZNF468			HHAT			LOC100506321			RABL2B
	SIM2			VPS4B			F8			GANAB
	RAB2B			CIR1			MTRF1L			SLC44A3
	RBM34			BAG5			GHR			RCC2
	STRN			ZNF3			FOSB			TTF1
	SRR			GAK			MSL3			MFAP3
	CTDSPL			RASAL2			MFAP3			PITRM1
	B3GALNT2			ARHGEF6			ODF2			WDR20
	RAP2A			FXR2			PITRM1			ACSS2
	C1orf115			AK1			SLC10A3			ATXN7L3B
	SLC35E2			CLTC			WDR20			ANAPC16
	CLDN15			PIGB			ANAPC13			DAZAP2
	PSD			CHST10			ACSS2			COMT
	NHLRC3			MRPL40			TWF1			SHC1
	MRTO4			AGA			ATXN7L3B			SDHC
	TRMT1L			LYAR			ANAPC16			SDHB
	ZNF266			ABCG2			DAZAP2			PADI2
	SOX18			ZCCHC4			OGFR			TARDBP
	SLC25A26			SAE1			STAT1			DDX42
	NSRP1			MED23			SCGB2B3P			BRD3
	SRSF8			GSTO1			RANBP3			ZSWIM8
	KLHL42			ATAD3A			DIAPH2			SNRPE
	MUTYH			DDX49			COMT			SMARCD1
	PMS1			NUP62CL			SAMD12-AS1			SLC1A4
	AGFG1			STOML1			STIL			FBXO28
	ELMOD2			HS6ST1			SHOX2			RPL28
	LATS2			CIAO1			SHC1			APP
	WDR47			CPSF4			SDHC			VEZT
	EML1			DGCR2			SDHB			OTUD5
	NEU3			PEX16			OSBPL1A			RAB2A
	TRIM66			SNRNP40			PADI2			MYO19
	SLC25A32			SYMPK			FBXO36			ARL5A
	CREB1			ARHGAP29			CASC3			CCDC50
	TMEM120B			INTS9			TARDBP			COMMD3
	TSPAN33			VPS37A			DDX42			ZNF384
	ZNF518A			STK36			BRD3			GTF3C5
	ZIC1			NELL2			ZSWIM8			CCDC107
	MAPK8IP1			FIBCD1			SNRPE			SMIM14
	SESTD1			RAD23A			FSCN1			ZNF691
	SNX25			MKKS			SNAPC2			TPM2
	ZKSCAN4			SEZ6L2			SNAPC1			FBXW2
	ZNF260			FARP1			SMARCE1			HSD17B4
	SOCS4			MKRN1			SMARCD1			FKBP8
	ZNF628			PTK7			SLIT1			ZNF330
	RUFY2			CLCN3			SLC1A4			RTN3
	SMIM3			ABLIM3			SLC4A2			SNX17
	MIS18A			PARVB			FBXO28			AHCYL1
	C10orf10			SYNGR1			RPL28			SAP30BP
	FAM109A			NEMF			APP			C12orf57
	BTN3A3			SLC33A1			VEZT			DNPEP
	ABCG2			VAPB			CCND3			CIZ1
	PPP1R3F			TBATA			MYLK-AS1			CLDN12
	CETN3			QPRT			ZACN			SYNE4
	KLHL13			NCOA6			OTUD5			CHORDC1
	HSD17B1			BUB3			DLG1-AS1			SERGEF
	FAM117A			ZW10			PITRM1-AS1			WDR45
	CERK			MAP3K13			SLC19A1			KAT7
	HSD17B12			AP4M1			TUSC1			PLA2G16
	VMA21			SLC24A1			GRK6			ZBTB17
	TTLL4			AIMP1			RAB2A			WWP1
	EXOC6			NINL			DNM1L			DEF8
	KAT2B			MEPCE			MYO19			CPSF6
	HYLS1			CARS			SMIM1			NUDT21
	TTC21B			CYTH1			ARL5A			PTPN21
	ZNF17			DLG5			PRDX5			ARFGAP2
	ZNF229			CCPG1			AP3M1			GUK1
	DCK			TBRG4			CCDC50			HTATSF1P2
	FUT11			CRLF1			ATF5			MND1
	TRPV4			VAMP3			COMMD3			KIN
	TIGD7			FHOD1			DGAT1			GAB2
	MKLN1			VTI1A			ZNF384			SEPHS2
	IL4R			ROR2			OAZ2			ZNF212
	ZNF101			B4GALT6			GLUD2			MYO1B
	TNFAIP3			MED1			GTF3C5			MFF
	SMARCAD1			NREP			PGLS			RAB3GAP1
	IDI2			PGAP3			GAS2L3			CCDC12
	THSD4			ZNHIT3			FAM84B			HARS2
	TMEM38B			UBR7			CCDC107			GRHPR
	POLI			ALKBH2			SMIM14			PTGR1
	AFAP1			SRSF11			MIR5189			USP30
	NOL9			COPB2			SVOPL			PARN
	GBP3			MATR3			NEAT1			RAB3GAP2
	ZNF841			PTPMT1			ZNF691			PICK1
	NELL2			KIF3B			WDR81			ICMT
	XPNPEP3			CD24			TRPM7			ACTR3
	SYTL5			PPIG			TPM2			ZFAND6
	CADM1			TXNL1			ZNF76			LINC00847
	KTI12			UBE4A			FBXL5			ASCC2
	EPG5			POGZ			FBXW2			RPS3
	FNDC3B			MED11			FBXO2			MGST1
	KCNAB2			ZNF782			HSD17B4			GMEB2
	KIAA0355			SPOPL			FBXO3			FBXW11
	POLB			GPN1			FBXW8			LDOC1
	TOE1			ZNF286B			FBXO25			RRN3
	GMEB1			SLCO3A1			FKBP8			MAPRE3
	FAM86C1			WDR53			CABYR			PLA2G15
	PXK			EDEM2			FZD4			LSM5
	FREM2			SCRN2			NAT6			TMEM218
	TMEM39A			ZNF383			RABGAP1			ENKD1
	EFEMP2			RANBP6			ZNF330			FAM66C
	STK32C			KLHL26			RTN3			HMBS
	B3GNT9			TIGD6			IFITM3			ZNF37BP
	DUSP5			HINFP			SNX17			OIP5-AS1
	CPEB4			ZNF629			ZNF837			ASL
	FERMT2			ZNF394			AHCYL1			SARNP
	EXOC8			RAD9A			IZUMO4			SERPING1
	RPS6KC1			APLP2			ASB16-AS1			SELENBP1
	TRPV1			UBA52			SAP30BP			MLH1
	MTR			TP53I11			ZNF169			WDR89
	MED17			INVS			C12orf57			HNRNPR
	SH2D3A			NUP160			URM1			HTATSF1
	GABPB2			MIR3911			DNPEP			ZSCAN22
	ZNF720			LRP8			BACE2			EWSR1
	PITPNB			DAP3			BACE1			ZNF420
	UBLCP1			RAB7A			CD2AP			EMC2
	CENPF			WRB			CIZ1			PGPEP1
	PIAS2			TACC2			CLDN12			TOR1A
	FAAH2			IKBKAP			SYNE4			COA5
	RAB8B			CDK8			CHORDC1			CNOT4
	FGFR1OP			TBX6			TBC1D19			FUCA1
	ALDH3B1			TAF1			ERC1			FTL
	ASB16			TBCA			SERGEF			GCDH
	CRTC1			STAU1			POLR3A			GALK1
	MAP3K5			RAP1A			FAF1			GLI3
	NDUFAF6			TJP1			PRKACB			GLA
	VAX2			NDUFA11			BTN3A2			SUDS3
	SAP30			IGF1R			FGFR1OP			ZDHHC6
	ACBD7			RFWD2			KRR1			CSNK1D
	USP37			HSCB			AP4S1			HADHA
	APOOL			MAP3K6			FICD			HADHB
	NBEA			ZNF619			WDR45			TTI2
	ASTN2			NUP214			KAT7			FEZ1
	ING2			CDC23			PKIG			TSPAN14
	RAPGEF2			BAP1			PLA2G16			MOV10
	MFSD8			PNPLA4			ZBTB17			KRTCAP3
	MAST4			USP11			LOC100287036			GPR143
	SLIT1			COIL			WWP2			NPC1
	TMPPE			COG6			ANKRD6			PDHA1
	KIAA1161			DENND6B			WWP1			PEPD
	CRISPLD2			PSMG3-AS1			DEF8			FBXO18
	LTBP2			FAM50A			CPSF6			LOC407835
	DIAPH2			PRPF3			NUDT21			LINC00265
	CDC42EP2			LATS1			UPK1A			KRT18
	GRB10			ATP6V0D1			TRIOBP			KCNH2
	NSUN3			MTA1			PTPN21			IDUA
	COG6			MDM2			ARFGAP2			DCAF4
	MAMDC4			ATE1			GUK1			LOC150776
	SCAND2P			ATP5C1			AP2A2			LOC202181
	RCAN3			PLEKHA1			FLJ20021			FAM136A
	DUS4L			DLEU7			HTATSF1P2			PGK1
	TRAPPC11			QDPR			PRH2			PHKG2
	KBTBD6			MTMR1			FLJ46906			TOR3A
	TYRO3			C5orf38			MND1			HERPUD2
	PROSER2			PTPN3			KIN			DNAJC1
	TMEM25			CCT5			SNRNP35			PEX6
	ZMAT3			ELF1			GAB2			LEPROTL1
	ZNF200			RPL3			PXDN			LMBR1
	HOMER1			ACADVL			SMARCAD1			HS1BP3
	CDCA2			ALDOA			PRPF40B			RHOF
	PPP1R3E			TSEN2			HSPBP1			CNPPD1
	ZNF445			ARPP19			KCNG2			PRMT7
	GSTCD			OXSM			ZDHHC8			PON2
	SWAP70			TAF1C			SEPHS2			CTSA
	RUNDC3A			CHTF8			ZNF212			NDUFB11
	NARS2			NVL			MUTYH			NACAP1
	MTX3			SMPD4			MYO1B			MIOS
	LIMS1			STRBP			MSRB2			FLJ10038
	HSF2			TMC4			VPS39			BLMH
	ZNF485			FUZ			MFF			SUZ12
	FAM200A			PDE8A			RAB3GAP1			HPCAL1
	MECR			RPL13			CCDC12			KCNMB3
	PLEKHA2			ETV3			HARS2			FAM179B
	BBS10			PACS2			GRHPR			SIMC1
	PCDHB14			MRPL20			GNG3			SPATA20
	KLHDC9			SP110			PTGR1			CT62
	COL6A1			PCK2			USP30			DHX57
	RBBP8NL			PIM1			PARN			PDP2
	FAM219A			RAB17			DHX35			TMEM87B
	PRDM10			DHX9			LOC100288069			UBN1
	NAIF1			NSUN5P2			RAB3GAP2			PAFAH1B1
	PIBF1			NSUN5P1			ZNF468			MRPL55
	WDFY2			DCTN5			PICK1			ATG7
	BRMS1L			ADRM1			ICMT			EBF4
	ZNF354B			MAP4K2			ANP32C			ADAT3
	USPL1			PSPH			ACTR3			DHRS1
	ZNF480			RABGGTB			LIMD1-AS1			TPRA1
	NTF4			RABGGTA			ZFAND6			CMC1
	MAP6D1			RAB27A			LINC00847			L3HYPDH
	HEATR1			PIGH			ASCC2			NIPSNAP3A
	ARHGEF4			PKNOX1			TMCC2			PIPSL
	SLC16A1			SREBF2			RPS3			ANKH
	POLH			SFSWAP			MGST1			SOD1
	PLEKHA8			SNRPD2			GPR107			COL4A5
	TMEM192			NARS			GRK4			RMND5B
	RGMB			NAP1L1			LYSMD1			GALNS
	SMC2			MYT1			JMJD7			BABAM1
	STK38L			NDUFA3			PIP5K1C			TDRD3
	IFT81			LYSMD4			FBXO9			GTPBP2
	SPDL1			MLLT3			GMEB2			PLEKHA3
	ZSWIM3			MCM2			ORC3			SLC11A1
	INVS			MGST3			FBXW11			XRCC6
	KDSR			KIF5C			KDM2A			IFI27
	GNG13			LLGL2			SHANK2			WDR5B
	TOB2P1			NFATC3			LDOC1			IL10RB
	KATNA1			OVOL1			BCL7B			NT5DC2
	PACRGL			C14orf37			NDST1			VPS33A
	IDI2-AS1			NDUFB2			RRN3			CIB1
	RAD18			NDUFB1			MAPRE3			OSBP2
	ARL3			NDUFB10			PIGN			STIM1
	MTFMT			PPP1R2			PLA2G15			SNHG6
	PAPOLG			NDUFB4			LSM5			ISCA2
	RAB11FIP2			NDUFS2			ERF			RPTOR
	FGF11			TAMM41			MSRA			CHRNA5
	GGN			NDUFS3			FBXL17			MAP1LC3B
	USP27X			NDUFS5			TMEM218			BLVRA
	MAP2			NDUFS6			ENKD1			BLVRB
	IGFL1			SYAP1			SLC25A46			ZNF304
	ZNF675			CCDC59			AGL			PPP1R16A
	SAV1			MNAT1			FAM66C			QARS
	GOLT1B			SLBP			SLC4A7			CUL9
	FCHO2			NECAP2			HMBS			KDM4C
	RIOK1			NCOA4			ZNF37BP			PDXDC1
	RGS17			LAMTOR2			OIP5-AS1			ENDOD1
	TBKBP1			HSD17B10			ACADM			ZHX3
	ZNF407			GTF2A2			ACAT1			XPO7
	OTUD6B			ONECUT1			RAB2B			SMURF2
	IL17RB			FOXA1			CETP			CEP170B
	ERN1			SLC35C1			CLCN5			FAM83D
	DHODH			AKT2			TRANK1			ARPC5L
	AGA			ABCB9			ASL			RAB1B
	SMC5			SHISA9			ATM			MICAL1
	WDR19			MTHFS			SARNP			MTHFSD
	GEN1			ST20			SERPING1			CCNL2
	ANGEL2			FOXRED1			MSH2			PRRG1
	EXO5			CCNT2			SELENBP1			NEBL
	SHQ1			MIER1			CST3			CSTF2T
	METTL21B			INTS7			MLH1			QRICH1
	SLC4A3			LOC100506548			WDR89			MATN1-AS1
	SNX10			GGA3			RPL17			KIAA0930
	CDPF1			FRMD6-AS1			KCNIP4			DNAJC16
	SLC22A17			HIF1A			HNRNPR			ESYT1
	CCNJ			E2F3			RASA1			LOC257396
	TMEM106A			FCF1			EPB41L5			MALAT1
	BTBD9			FRG1			HTATSF1			MGC72080
	NABP1			GALNT3			ZSCAN22			RSAD1
	ADAMTS9			GOLGA2			EWSR1			VIPAS39
	BMP8B			INPP5E			CES3			CIC
	IRAK4			CDC16			TOM1L1			ZC3H3
	PM20D2			FLOT2			ZNF420			PHF8
	ATP6V0A2			EZH2			EMC2			ATG2A
	C6orf52			FGD1			FAM134C			SORD
	ZNF256			PDE6B			TBCK			LRWD1
	TUBGCP5			BEND6			CYBA			SEL1L3
	MAOA			EPHB4			PGPEP1			DNAJC9
	SNX16			NUBP2			TOR1A			LOC389906
	C15orf52			ENSA			COA5			ARL6IP1
	KCNK2			EML1			UACA			ANXA4
	SMIM13			EPHA4			FECH			TBC1D1
	MRPL22			EPB41			CNOT4			TTLL12
	ATF3			UCHL5			FUCA1			PBXIP1
	SLC30A7			MRPS14			FTL			RCOR1
	TM2D2			DVL3			GCDH			SARS
	RMI1			DVL2			GBE1			MATN2
	TWISTNB			CMTM3			GALT			CEP68
	SLC36A1			USP16			GALK1			INTS3
	XRRA1			CNOT2			GLI3			RSRC2
	DNAAF3			ORC6			GLA			DIDO1
	AMZ1			ZSCAN32			MCM3AP-AS1			CIDECP
	ARV1			EPHA2			SUDS3			WDR73
	FNIP2			ZSWIM3			ZDHHC6			HSPA4L
	ERI1			MYCBP			NARFL			PIGV
	AMOT			DVL1			GSN			EP400
	HHEX			2002-09-01			CSNK1D			CUX1
	SLC16A8			DFFB			HADHA			MDK
	ZNF43			DMPK			HADHB			DEDD2
	HHLA3			TMX2			SIL1			CDKN2AIP
	FOXN2			TM2D3			SGSH			MPC2
	POC5			CNIH4			MPP5			RPL36
	MAP3K14			TCFL5			GZF1			TMEM165
	ARHGAP4			PARD3			PCTP			PTPN23
	POLA1			WDR45B			TTI2			DNAJC21
	ARNTL			DDX20			VPS16			MTMR9
	DUSP7			AKAP13			FEZ1			NELFB
	CMSS1			GPR180			TSPAN14			TFG
	BCL10			SEC63			CLDN15			EDEM3
	C10orf95			UCKL1			NIT1			MAGOHB
	RELT			PPP2R5D			INPP5A			DDX55
	GRAMD3			PRAF2			MOV10			CMAS
	SPAG1			GALNT6			KRTCAP3			DOPEY2
	POLR3B			RPL35			GPR143			NIPSNAP1
	SERPINE1			NXPH4			PHKG1			MASTL
	REEP2			PDCD10			NPC1			WDR59
	INO80D			DUSP12			PDHA1			SCAMP2
	PLAGL1			DDX19B			PEPD			NDFIP1
	ABHD14A			SNF8			FBXO18			CYB5B
	ZNF816			PNKP			MTM1			ZNF551
	SEMA4F			PARK7			LOC407835			CRLF3
	NUDT13			TMC6			C20orf27			CHUK
	RNF170			STK38			LINC00265			DDHD1
	ZNF790			ACOT7			LCAT			NCSTN
	H1FX-AS1			EXOC3			KRT18			AHCYL2
	LYRM9			GABARAP			KCNH2			SMG5
	ZNF814			GABARAPL2			IDS			MAU2
	RNASEH2B			SYNPO			IDUA			LARP1
	C1orf226			TWF2			TTC23			PPP1R13B
	MTHFD1L			TM7SF2			KCNQ1			MORC3
	MINOS1			TIMM9			DCAF4			SCRIB
	CAAP1			TIMM10			FAM219A			NUP188
	LRRC40			SPON2			LOC150776			SEC61G
	HEATR5A			SEC22A			RBPMS2			LARS2
	FAM122C			NPTN			LOC202181			STXBP5
	SLC12A6			RLF			TOR1AIP2			NIPBL
	ATF6			RPS6KC1			KIF9			MOB4
	BRICD5			RPL13A			LOC91450			YIPF3
	GCNT1			SF3B3			FAM136A			PCNP
	TMEM135			RSU1			PGAM2			ARHGEF7
	ORC3			ZNF281			PHKA2			SF3A3
	ZC3H6			VAX2			PGK1			SUGT1
	RPP30			WBP1			PHKG2			WDR54
	ADAMTSL4			UCK2			PHKB			MAP2K2
	CCDC61			USP21			TOR3A			ETHE1
	HAUS3			TNPO3			HERPUD2			NACA
	FMNL2			TXN2			DNAJC1			METTL18
	RASAL1			PRPF6			SEMA4A			ZNF326
	FAM117B			METTL6			PEX6			NCKAP1
	TMEM8B			CISD3			PFKM			ZFP69
	PCP2			RBMXL1			PKD2			WWC3
	FAM64A			C19orf38			KCTD6			ZNF777
	CEP55			ANP32E			LEPROTL1			EPC2
	HEATR3			ZNF202			LMBR1			SPRYD7
	MLLT11			IQCB1			HS1BP3			TRPC4AP
	FAM122A			PIN1			UBE2V1			TOR1AIP1
	CDKAL1			OR7E14P			RHBDF1			PDCD6
	INPP5F			NAPA			RPL38			PHF11
	MPPE1			NDUFV1			RHOF			UPF2
	ETAA1			RPL10A			PTEN			RPAP1
	LRRC8B			TFDP1			CNPPD1			ATP5J
	WRN			TMF1			PRMT7			AKR1A1
	HHAT			TCEB2			HEATR5B			DHRS7B
	WDR27			SSR3			PLOD1			C2CD3
	GPM6A			ZNF146			PON2			RPUSD4
	IGDCC3			ITSN2			CTSA			ADK
	ACTR5			HNRNPH2			PPOX			PHB2
	CTSK			YLPM1			NDUFB11			SYS1
	ACER3			ZXDA			FAM35A			HIP1R
	ALDH7A1			ZP3			WDR44			UBE2E1
	TPTE			CSDE1			ELP4			CLK3
	RIN1			LSM14A			MTHFD2L			CENPP
	PIGA			THUMPD3			FAM133B			PPP1R12B
	GTPBP8			VCP			ZNF280D			FAM127A
	ZNF77			NR1H2			PIK3C2A			FAM127B
	SLC35D1			ZNF81			NACAP1			ZFP91
	TMEM206			ZNF41			ANKIB1			ATRN
	FMO4			ABCB8			MIOS			XYLT2
	C3orf62			SUPT16H			FLJ10038			BRD7
	MMAA			PROSC			AP5M1			LRPAP1
	TIFA			UBTF			TPI1			U2SURP
	DBF4			ZMYM6			SFI1			SRSF5
	PHKA1			SF3A2			PACRGL			PIAS4
	WDR36			NUP50			BLMH			LY6E
	ARHGEF38			ERLIN2			SUZ12			POLD2
	CYP2R1			C14orf1			TPP1			CBX1
	RTN4R			SNX15			NDUFA12			AURKAIP1
	GTPBP10			LSM6			CTSK			RPL8
	SEC14L2			RABL2B			RB1			SCYL2
	BIVM			CCDC148			PITX2			ZNF689
	NUDT7			POLR3B			UBAP1L			MBD1
	CPPED1			LRP10			HPCAL1			SUPT4H1
	BICD1			GANAB			CTNND2			EXTL3
	ZNF143			SLC44A3			KCNMB3			ZNF189
	CHML			OCLN			TGM1			SLC39A10
	SLC46A1			RAD54B			ABCC8			CDC40
	SSX2IP			RCC2			FAM179B			C19orf33
	ANKRD44			CCDC124			SLC35G6			SRRT
	ZFP14			CLDND1			SIMC1			RPS27L
	DONSON			POLE4			SPATA20			POP5
	BCAP29			TTF1			ANP32A-IT1			GSTK1
	CDC6			MIR497HG			LINC00472			PCGF3
	RDH16			CHEK1			GTF2I			MAD2L2
	MDGA1			MTRF1L			CT62			GLTSCR2
	TAGLN			MVK			MTMR9LP			TYSND1
	ATP8A1			CDKN2C			LOC401127			DCAF7
	PPP2R3A			MFAP3			KCTD2			ERLEC1
	GNA14			ODF2			NUDT2			MMADHC
	DPH5			RHOBTB1			DHX57			SURF4
	B3GALT5			PITRM1			PDP2			SURF1
	NCKAP5			SGMS2			VPS53			VPS51
	FZD1			SEC13			TFRC			MITD1
	NAT8			RIMS4			TMEM87B			ERAL1
	POT1			WDR20			CALM3			CALCOCO1
	ZNF615			ENO1-AS1			AMZ2P1			AGRN
	ACTA2			ACSS2			FLJ23867			SLC25A12
	DCBLD1			TSC22D1-AS1			HCFC1R1			SPPL3
	OXNAD1			ATXN7L3B			WNK4			MAPK9
	CLEC11A			ANAPC16			UBN1			ADAMTS17
	GDF11			C2CD4C			GPD2			BCAP31
	RAB39B			DAZAP2			GM2A			PEX3
	RNF207			IFFO2			GLB1			GNB1L
	LRRC23			NUPL2			PAFAH1B1			MOB2
	KCND3			PAXIP1			NCF2			RPL15
	RASA2			ATF6			MRPL55			COMMD7
	ZNF416			STAT1			MBOAT2			SMARCA5
	IFI44L			PSEN1			EPN1			MRPL53
	STARD13			KIF22			TMEM104			LARP1B
	EGLN1			DLST			MINK1			UBQLN1
	ZNF846			RANBP3			ATG7			PPM1D
	IGFLR1			GRIN1			EXOSC6			RGS19
	PLEKHH2			TRIM41			EBF4			MKNK1
	N6AMT1			DIAPH2			ZNF354B			PRKRA
	TGDS			COMT			ADAT3			TTLL11
	LINC00638			ABL2			DHRS1			RHOA
	DIRAS1			NRP1			TPRA1			HIPK1
	ADA			SGTA			CPT1C			NMRAL1
	AGBL2			SH3BGRL			CMC1			CRYL1
	ZNF180			SFTPD			L3HYPDH			RRNAD1
	SLC52A3			SHC1			C2CD4D			ADIPOR1
	CPEB2			SH3GL1			NIPSNAP3A			PIGT
	AP4S1			SDHC			TPST2			NEK8
	AMN1			SDHB			PIPSL			CDC7
	KIAA1324L			MIF4GD			PEX1			MRPS7
	WDR31			MAP2K4			ANKH			ERGIC3
	NKX3-1			PSMD12			SOD1			NOSIP
	TERF1			IFT20			ZNF707			ADAM32
	ZC3HAV1L			PADI2			OLFM3			ZNF282
	PCDHGB1			CASC3			COL4A5			PIP5K1A
	SPAG5			TARDBP			ATRX			RFC2
	MMP24			DDX42			RMND5B			BTBD3
	ELOVL2			BRD3			GALNS			TAF15
	KIAA1841			FASTKD2			BABAM1			ZGPAT
	ARHGAP44			ZSWIM8			MRPS26			SGPL1
	C11orf74			SNRPE			CCDC130			CPNE3
	RPGR			SNRPB2			CSNK1G1			EIF2B5
	SLC22A18AS			SNRPA1			FBXO46			NAE1
	DNAJC6			SNRNP70			HM13			MCFD2
	RAB3IP			SMARCC2			TDRD3			ATP6V0E1
	TMEM88			SMARCC1			ITFG1			AP3D1
	MCTS1			SMARCB1			YTHDF3			ST13
	ALS2CL			SMARCA4			TIMELESS			RIOK3
	ELFN1			SMARCD3			GTPBP2			RPLP0
	TFR2			SMARCD1			PLEKHA3			OSBPL2
	SLC34A3			SLC18A2			SLC11A1			GGH
	ZNF367			SKI			XRCC6			FLNA
	RFX2			SLC1A4			TRMT13			HDAC3
	DNAJC24			FBXO28			NDFIP2			UNC45A
	PLCB1			ZNF879			GSTM1			C15orf40
	TTC33			RAB11B-AS1			IFI27			TUSC3
	POLK			RPL28			IGFBP2			PILRB
	ZNF234			APP			FTH1P3			ALKBH3
	GLDN			VEZT			WDR5B			EXOSC8
	EPS8L3			TCF3			TMEM234			TNFRSF14
	ZNF625			LOC100506844			CCDC71			NAPG
	TMEM37			OTUD5			LTBP1			TBC1D20
	FAM210A			TTN-AS1			IL10RB			RNGTT
	PLCG2			SHARPIN			NT5DC2			FOPNL
	ABCC8			PTPRG-AS1			GPBP1			CYB5D1
	POC1A			ALG11			BCL2			CCDC43
	FOXD1			GRK6			VPS33A			RFXANK
	PARP8			RAB2A			GSR			USP8
	ARHGAP29			CLCN7			RFX2			B4GALT3
	GSG2			MYO19			CIB1			COMTD1
	ITPKA			ADAT1			OSBP2			MAPK1IP1L
	C17orf97			ARL5A			NCK2			MBTPS1
	ZNF114			AP3M1			ZNF83			EIF3H
	LOC100289511			PTBP3			STIM1			EIF3F
	DOCK8			FAM98C			SNORD58A			VAMP8
	IGSF9B			CCDC50			ALDH9A1			HN1L
	GDAP1			TMEM167A			SNHG6			DNAAF2
	FADS2			PSMA3			MARCH7			ATG4B
	ZNF57			ATF5			CYP51A1			EXOC3L1
	CCDC28B			COMMD3			TUT1			TPP2
	GPRC5B			ZNF384			ISCA2			TPT1
	SNAPC1			OAZ2			CYP2A6			HSP90B1
	SRRM5			TECR			METTL4			ZNF772
	ANKEF1			FRAT2			CYP2E1			TMPO
	OTUD3			GTF3C5			RPTOR			SEC62
	BMS1P4			TSSK4			CHRNA5			TMBIM6
	ADAM22			ZNF575			CHRNB2			PAXBP1-AS1
	ZNF283			CCDC107			CACNB2			CHCHD3
	IFNB1			SMIM14			CACNB1			METAP2
	ZNF513			LYST			STXBP2			TAF9
	NMNAT1			ATP2A3			CDK5RAP2			TAF2
	ZSCAN20			FAM129B			MAP1LC3B			TCEA2
	LEF1			ARHGEF38			BLVRA			TBCC
	HSPBAP1			AGBL5			BLVRB			SSRP1
	FBXO36			ZNF691			IFI6			SRP54
	RINL			ALG14			RANBP17			RPAIN
	ZNF10			LINGO1			ZNF304			SRP9
	ESPL1			LSM1			NUP205			MTCH2
	L2HGDH			WDR81			BCAP29			LOC100506207
	HSD17B11			TPCN1			PPP1R16A			ZKSCAN1
	TSHZ2			UPK3BL			RGL4			ZNF134
	FBXO8			EML2			QARS			DEK
	ZNF181			FBXL2			MRPS27			PAX8
	ICA1L			TPM2			CUL9			TRRAP
	FLVCR1			HMGB3			ZC3H13			USP5
	IMMP2L			LRRC29			PEG10			SNN
	GPR68			FBXW2			AVL9			YWHAH
	GK5			FBXO2			KDM4C			YWHAZ
	ZNRF3			FBXO10			MYCBP2			DHRS4L2
	C1GALT1			HSD17B4			PDXDC1			ZNF45
	UGGT2			FBXW8			TNIK			SFXN2
	ZNF287			FBXO24			SNORD18C			STT3B
	GPR180			FBXO7			ENDOD1			C16orf86
	FAM76A			FKBP8			ZHX3			UBE2I
	SCML2			FBXO8			FRYL			UBE2G1
	ZNF813			FOXD3			DOPEY1			UBA1
	PUS10			TIMM10B			XPO7			UBE2A
	IKBIP			HEXB			ZNF292			UBE2D2
	CEP57L1			GCA			AAAS			TUFM
	SUSD1			ZNF330			COPS7B			LYPD6B
	SDCCAG8			RTN3			SMURF2			TST
	FAM111B			MAPKBP1			CEP170B			ATP6V1E1
	RUSC2			SNX17			FIP1L1			VDAC1
	PKP2			LPIN3			SNX27			VBP1
	HDAC4			CHIC1			FAM83D			VASP
	CRLS1			AHCYL1			DGCR14			USP4
	ZNF669			ACBD7			CISD2			UQCRC1
	PARP11			COX10-AS1			HMGCR			NRCAM
	DOK3			SAP30BP			ARPC5L			ENY2
	RGS16			C12orf57			PABPC3			TSSC1
	ITGA9			PSMG1			MED25			MAFG-AS1
	PITPNM2			CHIC2			TRIM56			MORN3
	ZNF571			ZNF674			SBF2			ZNF358
	PAIP2B			DNPEP			RNF38			COMMD9
	TBC1D10C			CIZ1			EFCAB6			SRBD1
	DNAJC18			CLDN12			ARV1			SENP8
	PLEKHO1			SYNE4			ABCC4			2009-09-01
	ALG6			CHORDC1			GAS6			RBM10
	RNPC3			TFIP11			GGCX			RADIL
	OTX1			SLC25A10			GRIN2C			AGGF1
	UST			SERGEF			GRINA			YEATS2
	NANOS1			AATF			RAB1B			CTNNA1
	IL15			DDAH1			MICAL1			DEAF1
	NPAS1			COPG2			MTHFSD			RUSC1
	TMEM67			POLR3A			CCNL2			TPM3
	ZRANB3			KIF3A			CEP85			DNAJB14
	SH3BGRL2			SNX19			EXO5			TADA3
	STX2			RNF146			TBC1D15			ARMC1
	RBM7			ARFIP2			PRRG1			TMEM33
	TM4SF18			ZNF155			FAM160B2			RFWD3
	KCNQ1OT1			RPP14			NEBL			THOC2
	NT5DC3			HNRNPUL1			MEAF6			RBBP4
	KDM8			WDR45			PARP12			ARL8B
	HMMR			ZBTB44			S100PBP			CALU
	PDZD7			KAT7			ZNF574			SMG8
	ZNF573			CDC37			IPPK			SEC61A2
	RNF8			PLA2G16			ISCA1			RMDN3
	SETDB2			KALRN			LOC81691			MRPS10
	SPESP1			PWP1			DENND4C			TBCCD1
	MED12L			ZBTB17			TMEM116			RNF220
	SP4			WWP2			KANSL1			HAUS2
	SHCBP1			ABHD2			CLUH			ANAPC15
	LOC652276			WWP1			FAM208A			TP53TG1
	ZNF169			DEF8			POFUT2			A1BG-AS1
	DNAJB5			CPSF6			BICD2			LAMP2
	PANK1			KLHL22			WSCD1			INO80E
	RANGRF			NUDT21			KIAA1107			SEC61A1
	CRAT			TRIOBP			RPGRIP1L			C3orf33
	FAM84A			RER1			CSTF2T			PRRC2B
	B3GNT3			PTPN21			KIAA0556			HOOK2
	SERINC4			ARFGAP2			ATP11A			LMNA
	CAMKMT			GUK1			OTUD3			DSTN
	ST5			AP2A2			QRICH1			SLC25A24
	CENPK			UBE2C			CTBP1			DPP7
	GAS2L3			SDF2			RUFY4			PDCD6IP
	ST3GAL3			CHL1			ZSCAN16			ANAPC4
	ARL4D			PYGL			MATN1-AS1			NSMCE2
	DGKA			HTATSF1P2			SIN3B			DTWD2
	MINA			LOC283335			KIAA0930			MRPL45
	RASGRP3			ZNF790			SATB2			UBQLN2
	ZNF585A			LOC100505549			USP22			BAZ2A
	HNMT			MND1			CLASP1			SMCR8
	LOC81691			KIN			DPY19L1			ZMAT2
	ATP1A3			GAB2			TBC1D30			PDZD8
	TPPP			TLK1			ADAM10			POLE3
	PTBP2			SMARCAD1			DNAJC16			EBPL
	HECW2			MESDC2			ESYT1			ST7
	SCLT1			RHBDD3			LOC257396			C4orf33
	FGD3			FTSJ1			MALAT1			ITM2B
	FXN			MORF4L2			LOC400927			USP47
	FMN1			ZNF346			MGC72080			TDP1
	TAF1L			SEPHS2			RSAD1			CCDC149
	NUBPL			SEPHS1			RPL13P5			MMGT1
	DYX1C1			RHOQ			ITPK1-AS1			STK16
	RNF150			RRAS2			VIPAS39			NEDD8
	CHN1			HBP1			CIC			NFRKB
	EBLN2			ZNF212			CLCC1			RIC8A
	NOS3			XRN2			YIPF1			CDKN3
	LY6D			MAGI2			ZC3H3			NUCB1
	ANKRD6			HS2ST1			DCUN1D4			CANT1
	SERAC1			MUTYH			ALMS1			ATP5G2
	GPCPD1			MYO1B			PHF8			MIR635
	TCEANC			MFF			ATG2A			HAX1
	CLEC2D			SGCE			N4BP3			CAPZA1
	UBE2NL			RAB3GAP1			SMC5			DUT
	ME2			C11orf57			GLMN			CAPZA2
	NAGS			CCDC12			SORD			POLR2H
	MMP11			ISCU			LRWD1			IL20RA
	CFL2			BRF1			SYNE2			BUD13
	HSPA12A			HARS2			SEL1L3			ZNF48
	HRH2			GRHPR			PLCB1			NPEPPS
	PHLDA1			GTF3C4			DNAJC9			NUP107
	FAM166A			B3GAT3			LOC389906			PDK1
	DSCR8			PTGR1			OCIAD1			FAM3A
	ATOH8			MLYCD			ARL6IP1			METTL5
	PIGK			USP30			PLEKHM2			NFXL1
[truncated: 3,160 more rows]
