# Supplementary material
Source: publisher figshare collection journal article supplement (https://tandf.figshare.com/articles/dataset/_/11369025)
Supplement: Supplementary file 1 [file 1 › Supplementary Table 3.xlsx]

## Sheet: Feuil1
Gene upregulated by IGF		Genes unaffected by IGF
DMP1		DBT
MYBL2		PRKCZ
SHMT2		PRDM16
ASNS		CAMTA1
ESPL1		USP48
SFT2D3		EYA3
CDCA8		KHDRBS1
SLC7A11		SFPQ
CLGN		RNF220
CEBPG		PTPRF
PPM1E		GPBP1L1
MKI67		USP24
MLLT11		ITGB3BP
CORO1A		NTNG1
VEGFA		PHTF1
POLD1		RAP1A
MIR6758		GNAI3
MCM10		GBAP1
PRC1		SOAT1
SCD		RASAL2
EIF4EBP1		PPP1R12B
CEP55		LYST
PKMYT1		MTR
FANCA		LOC100130331
RBM14		NADK
RRM2		TNFRSF14
RFC2		DFFB
DMD		PER3
ABCA12		RERE
ZWINT		KIF1B
CKS1B		CLSTN1
CA4		MTOR
MYBL1		PEX14
SPC25		KAZN
CDC45		FBXO42
SHCBP1		MFAP2
HIST2H4B		PADI2
IFRD1		NBPF1
AURKA		CAPZB
PCK2		EIF4G3
RAD51AP1		ECE1
E2F1		CDC42
IARS		LUZP1
PLK1		WASF2
CENPM		RCC1
MAGOHB		SRSF4
CHAC1		PTP4A2
NDC80		KPNA6
DDIT3		PHC2
DHRS2		ZMYM4
VARS		INPP5B
ASCL1		RLF
GYS2		BMP8B
SLC25A10		BMP8A
AREG		KCNQ4
UPP1		FOXJ3
CDT1		SZT2
FILIP1L		CMPK1
NCAPH		ZFYVE9
NRP1		HSPB11
BRCA2		ACOT11
WARS		DNAJC6
KIF2C		RAVER2
UBE2S		PDE4B
TACC3		SERBP1
RAD54B		WLS
DSCC1		LRRC40
DTNA		ZZZ3
GPSM2		PRKACB
DUT		HS2ST1
TPX2		LRRC8B
RACGAP1		GBP1
TUBG1		PKN2
SKA1		RPAP2
SREBF1		FNBP1L
ACAT2		MTF2
PBK		CDC14A
BEGAIN		WDR47
TOX3		GPSM2
SMC4		KCNC4
SPAG1		LRIG2
GDF15		TRIM33
WDR62		MAN1A2
SLC1A4		CHD1L
INSIG1		VPS45
ORC6		ENSA
HOMER2		POGZ
CMC2		SNX27
NRGN		COPA
FAM64A		DDR2
MELK		MPC2
SMTN		BLZF1
SMC2		VAMP4
CCNA2		CACYBP
MDM1		RABGAP1L
MTSS1		FAM20B
ZNF787		CEP350
GALE		MR1
LUM		DHX9
RASSF1		LAMC1
NXPH4		CDC73
GARS		DENND1B
MIR7112		NR5A2
PHGDH		CAMSAP2
PRPF3		IPO9
PSPH		PPFIA4
PLK4		PLEKHA6
GTPBP2		LRRN2
TRIP13		PPP2R5A
SLC7A5		RPS6KC1
NEK2		PTPN14
CRYBB2P1		CENPF
FOXM1		GPATCH2
ANP32E		RAB3GAP2
ZAK		MARC1
UBE2C		DUSP10
NCAPH2		TP53BP2
THAP9-AS1		URB2
CDK1		PGBD5
CEBPB		ARID4B
APLP1		HEATR1
AURKB		EFCAB2
FBXO5		DESI2
SLC7A1		SDF4
BRCA1		DVL1
SMG5		MRPL20
KCNJ15		GNB1
SLC1A5		PEX10
PLEKHH3		PANK4
ATF3		TP73
GDF11		WRAP73
YARS		RPL22
CDC6		GPR153
RAD51		TNFRSF25
KIF18B		ESPN
EXO1		NOL9
SARS		THAP3
G6PD		ENO1
DHRS11		SPSB1
PCDH8		PIK3CD
ABCB6		DFFA
MAP1B		MASP2
CDK16		FBXO2
MAP7D1		MTHFR
CDC20		MIIP
ATAD2		PRDM2
FAM129A		DDI2
BMP7		UQCRHL
SERPINA3		MST1L
GEM		CROCC
AGTR1		ALDH4A1
NF2		EMC1
SPAG5		AKR7A2
DTYMK		MUL1
NEIL3		LINC00339
ZZEF1		RPL11
CLPB		LYPLA2
FUT1		RCAN3
LONP1		RHD
TRIB3		LDLRAP1
PSMC3IP		MIR3917
IFRD2		PAFAH2
POLA2		ZNF593
TNIK		GPN2
CHEK1		WDTC1
TOP2A		MAP3K6
CCNB1		SMPDL3B
NCAPG		YTHDF2
H1F0		MECR
PPCDC		LAPTM5
CENPE		FABP3
CDKN3		SNRNP40
CKB		COL16A1
AARS		EIF3I
ALDOC		IQCC
SYNE3		CCDC28B
PSRC1		MARCKSL1
AUNIP		HPCA
HMMR		AK2
SLC3A2		TRIM62
H2AFJ		GJB3
BIRC5		C1orf216
OR7E2P		AGO1
KIF23		TEKT2
GAL		SH3D21
GABPB1		MTF1
UPF3B		GJA9-MYCBP
MRPL2		PPIE
FRK		CAP1
PROC		RIMS3
		NFYC
ITGAM		PPIH
SREBF2		KDM4A
KIF15		ARTN
MVD		B4GALT2
CENPN		DPH2
TNFRSF12A		ATP6V0B
SLC35F6		HECTD3
BMP1		MUTYH
DNLZ		PRDX1
CDRT1		NASP
SF3A2		IPP
YBX2		TSPAN1
EZH2		EFCAB14
WISP2		RNF11
ACOT7		C1orf123
SOX4		CPT2
AVPR1A		TTC22
KIF4A		TTC4
TMEM8A		JUN
LAD1		CYP2J2
TROAP		TM2D1
ITGA4		LEPROT
PRKACA		HHLA3
C11orf24		USP33
C9orf40		FUBP1
NCS1		IFI44
RPS6KA4		RPF1
PRR3		CYR61
CBS		SH3GLB1
DDIT4		GLMN
PRRC2A		RPL5
PLAC1		TMED5
CEACAM7		ARHGAP29
HJURP		AGL
CLSTN3		SLC35A3
CRABP2		EXTL2
ZNF580		PRPF38B
NFKBIB		CLCC1
FANCI		SORT1
CAMK2B		PSMA5
CHAF1A		CSF1
NABP2		SLC16A4
PDLIM7		CEPT1
E2F8		WDR77
TNNC2		WNT2B
H1FX		SLC16A1
DEPDC1		DCLRE1B
DUSP13		CSDE1
MIR15A		SIKE1
SHB		VANGL1
PTK2B		TXNIP
KIF18A		PEX11B
NCAPG2		RBM8A
RARG		GPR89A
TP63		ACP6
DNM1		C1orf54
PPFIBP1		APH1A
DUSP6		MCL1
RTEL1-TNFRSF6B		ADAMTSL4
CTNNA2		CERS2
CR1		CDC42SE1
PTPRO		PIP5K1A
SERPINE1		VPS72
FLNA		PSMD4
ACTL6B		PI4KB
INS		PSMB4
TTK		TDRKH
LAT2		SPRR1B
TSPAN7		S100A8
TFAP2A		S100A3
PLD1		S100A13
CASKIN2		INTS3
IVL		RPS27
CDC42EP1		SLC39A1
MYO19		UBAP2L
CBX4		UBE2Q1
RBFOX1		ADAR
LOC101927562		MUC1
PARP2		CLK2
PPP3R1		DAP3
UBE2M		GON4L
DTL		UBQLN4
GHSR		LAMTOR2
GRK2		SEMA4A
TMEM265		PMF1
DENND1A		RHBG
PPP1R14B		GPATCH4
SLCO1A2		MRPL24
XRCC3		ISG20L2
VAMP2		PEX19
NUP62CL		DCAF8
RBL1		F11R
RARRES2		B4GALT3
AGPAT3		USP21
SLC4A2		UAP1
NOS1AP		HSD17B7
C2CD2L		MGST3
MIR6872		ALDH9A1
CNTRL		TMCO1
NEMP1		POGK
ARG2		MPZL1
GUSBP3		SFT2D2
E2F2		SLC19A2
CNOT3		SCYL3
MBD4		PRRC2C
CALM3		METTL13
HBEGF		PRDX6
ASPHD1		KLHL20
CARD14		MRPS14
DCAF15		STX6
MAPRE3		IER5
NCLN		RGS16
ARHGDIA		ARPC5
MRE11A		IVNS1ABP
MAN1A2		TPR
DLEU2		TROVE2
CLSPN		KLHL12
MIR1178		RABIF
NOX3		TMEM183B
		ADIPOR1
		CYB5R1
		PIK3C2B
		NUAK2
		CDK18
		MAPKAPK2
		CD55
		CD46
		LAMB3
		RCOR3
		TMEM206
		NENF
		NSL1
		ANGEL2
		TGFB2
		MARC2
		AIDA
		DEGS1
		NVL
		WDR26
		PARP1
		MIR3620
		GJC2
		TRIM17
		TAF5L
		EGLN1
		KCNK1
		RBM34
		GGPS1
		FH
		HNRNPU
		COX20
		TFB2M
		SCCPDH
		ZNF672
		YIPF4
		TMEM214
		EHBP1
		NAGK
		CD8A
		TBC1D8
		PTPN4
		R3HDM1
		COBLL1
		TLK1
		OLA1
		PRKRA
		SATB2
		BMPR2
		XRCC5
		CUL3
		TRIP12
		AGAP1
		TRAPPC12
		KIDINS220
		NOL10
		NCOA1
		DTNB
		ASXL2
		SLC35F6
		NRBP1
		EIF2AK2
		PRKD3
		SOS1
		DHX57
		THUMPD2
		EML4
		RHOQ
		FBXO11
		PSME4
		RTN4
		SPTBN1
		VRK2
		USP34
		UGP2
		C1D
		AAK1
		SNRNP27
		C2orf42
		TET3
		TACR1
		HK2
		GCFC2
		RPIA
		LMAN2L
		STARD7
		INPP4A
		EIF5B
		NPAS2
		SLC9A2
		NPHP1
		ACOXL
		MERTK
		CCDC93
		TMEM177
		EPB41L5
		CLASP1
		SAP130
		MAP3K2
		MZT2B
		C2orf27A
		DARS
		ACVR2A
		KIF5C
		NEB
		RIF1
		KCNJ3
		PLA2R1
		RBMS1
		TANK
		CERS6
		GAD1
		WIPF1
		NFE2L2
		UBE2E3
		NCKAP1
		TFPI
		GLS
		MFSD6
		CASP8
		CFLAR
		TRAK2
		NBEAL1
		PECR
		TNS1
		ACSL3
		DOCK10
		COL4A3
		SP100
		SP140L
		CAB39
		ARMC9
		EIF4E2
		GIGYF2
		ARL4C
		LRRFIP1
		ASB1
		NDUFA10
		PPP1R7
		ACP1
		RPS7
		YWHAQ
		PDIA6
		E2F6
		GREB1
		TRIB2
		DDX1
		MYCN
		PUM2
		ADCY3
		HADHA
		KHK
		ATRAID
		SLC30A3
		MPV17
		EIF2B4
		PPM1G
		GTF3C2
		GPN1
		SUPT7L
		SLC4A1AP
		FOSL2
		PPP1CB
		FEZ2
		CEBPZ
		CYP1B1
		SRSF7
		COX7A2L
		ZFP36L2
		MCFD2
		EPCAM
		FOXN2
		RPS27A
		CCT4
		AFTPH
		RAB1A
		ACTR2
		SPRED2
		NFU1
		PCBP1
		TIA1
		MPHOSPH10
		TPRKB
		NAT8B
		DGUOK
		STAMBP
		MOB1A
		DCTN1
		INO80B-WBP1
		SEMA4F
		MRPL19
		TMSB10
		RETSAT
		GGCX
		C2orf68
		RMND5A
		FAHD2CP
		ADRA2B
		CIAO1
		KANSL3
		CNNM4
		COX5B
		ACTR1B
		CHST10
		RPL31
		UXS1
		RANBP2
		POLR1B
		RABL2A
		RPL23AP7
		DDX18
		RALB
		TSN
		HS6ST1
		PTPN18
		PLEKHB2
		TUBA3D
		CCNT2
		UBXN4
		PRPF40A
		RPRM
		MARCH7
		PPIG
		GORASP2
		DCAF17
		SLC25A12
		SP3
		HOXD12
		TTC30A
		ITGAV
		ASNSD1
		OSGEPL1
		NAB1
		STAT1
		SF3B1
		HSPE1
		HSPD1
		ORC2
		SUMO1
		INO80D
		FASTKD2
		FZD5
		IDH1
		RPE
		RPL37A
		IGFBP5
		ARPC2
		AAMP
		CTDSP1
		SLC11A1
		TTLL4
		WNT6
		GLB1L
		ATG9A
		GMPPA
		OBSL1
		CHPF
		MRPL44
		AGFG1
		NCL
		PTMA
		CHRNG
		COPS8
		SCLY
		GPC1
		RNPEPL1
		STK25
		ATG4B
		THAP4
		HYAL3
		RARB
		GOLIM4
		EDEM1
		SETD2
		DCBLD2
		SLC15A2
		MBNL1
		KCNMB2
		UBXN7
		ACAP2
		SEC13
		IL17RC
		MTMR14
		TOP2B
		NGLY1
		SLC4A7
		OSBPL10
		OXSR1
		XYLB
		DLEC1
		CTDSPL
		RPL14
		TRAK1
		ANO10
		ZNF35
		ZDHHC3
		LARS2
		MAP4
		SMARCC1
		USP19
		ARIH2
		ATRIP
		SEMA3F
		RHOA
		DAG1
		WDR82
		DCP1A
		PBRM1
		SFMBT1
		PRKCD
		ARHGEF3
		THOC7
		MAGI1
		TMF1
		FRMD4B
		RYBP
		CHMP2B
		EPHA3
		CEP97
		CBLB
		ALCAM
		BBX
		ATP6V1A
		KPNA1
		ZNF148
		SNX4
		OSBPL11
		SLC12A8
		PLXNA1
		RAB7A
		TMCC1
		MRPL3
		DNAJC13
		CDV3
		RAB6B
		RYK
		CEP70
		RASA2
		ATR
		HLTF
		RNF13
		PLCH1
		PRKCI
		ZNF639
		ZMAT3
		KLHL24
		ATP11B
		EPHB3
		MAP3K13
		LPP
		IL1RAP
		OPA1
		APOD
		SENP5
		DLG1
		ARL8B
		OGG1
		BRPF1
		ARPC4
		CRELD1
		EMC3
		MKRN2
		TMEM40
		RPL32
		LSM3
		CAPN7
		COLQ
		RAB5A
		RPL15
		NR1D2
		CMTM6
		PDCD6IP
		LRRFIP2
		ACVR2B
		EXOG
		SLC25A38
		EIF1B
		ENTPD3
		CTNNB1
		NKTR
		ABHD5
		EXOSC7
		LIMD1
		CCR1
		NBEAL2
		ZNF589
		PLXNB1
		NCKIPSD
		CELSR3
		PRKAR2A
		QRICH1
		P4HTM
		IMPDH2
		CCDC71
		USP4
		MST1
		RNF123
		RBM5
		NPRL2
		TUSC2
		ZMYND10
		C3orf18
		CISH
		HEMK1
		TEX264
		PARP3
		RPL29
		DUSP7
		TWF2
		ITIH4
		FAM208A
		HESX1
		PDE12
		RPP14
		C3orf14
		GPR27
		PPP4R2
		CGGBP1
		PCNP
		RPL24
		CD47
		SPICE1
		SIDT1
		TMEM39A
		ADPRH
		NDUFB4
		FAM162A
		UMPS
		TPRA1
		SEC61A1
		CNBP
		TOPBP1
		ANAPC13
		MSL2
		SLC35G2
		NCK1
		FAIM
		RBP1
		SLC25A36
		PLOD2
		ZIC1
		TM4SF1
		TSC22D2
		SERP1
		RAP2B
		SSR3
		CCNL1
		GFM1
		IL12A
		B3GALNT1
		MYNN
		SKIL
		EIF5A2
		ACTL6A
		PARL
		EIF2B5
		ALG3
		POLR2H
		ATP13A3
		SDHAP2
		TNK2
		TFRC
		NCBP2
		PIGZ
		RPL35A
		LEF1
		IL15
		WFS1
		HTT
		PDS5A
		UNC5C
		ALPK1
		TRIM2
		GAK
		PDE6B
		ZNF718
		SLBP
		LETM1
		GRK4
		ADD1
		KIAA0232
		RFC1
		UBE2K
		RBM47
		CLOCK
		PPAT
		CEP135
		UBA6
		CCNI
		ENOPH1
		AFF1
		FAM13A
		BMPR1B
		TSPAN5
		PPP3CA
		PPA2
		HADH
		SEC24D
		MGST2
		MAML3
		SMARCA5
		SMAD1
		ARFIP1
		RAPGEF2
		KLHL2
		PALLD
		GPM6A
		FAT1
		SLC26A1
		IDUA
		FGFR3
		FAM193A
		SH3BP2
		MFSD10
		NOP14-AS1
		LRPAP1
		HGFAC
		MSX1
		MAN2B2
		S100P
		MRFAP1L1
		ZCCHC4
		PTTG2
		RPL9
		LIAS
		COMMD8
		SRP72
		PAICS
		REST
		BTC
		G3BP2
		NAAA
		CXCL11
		SCARB2
		HNRNPD
		THAP9
		CDS1
		EIF4E
		DAPP1
		DNAJB14
		SLC39A8
		NFKB1
		UBE2D3
		AIMP1
		RPL34
		CASP6
		PLA2G12A
		GAR1
		AP1AR
		ANXA5
		BBS7
		ABCE1
		LSM6
		SNORD73A
		ETFDH
		CLCN3
		SPCS3
		DCTD
		TRAPPC11
		SLC25A4
		LRP2BP
		UFSP2
		MAN2A1
		ARL15
		MAST4
		EFNA5
		FAM13B
		CSNK1A1
		TBC1D9B
		TRIO
		ZFR
		C1QTNF3-AMACR
		PRLR
		SKP2
		NIPBL
		NDUFS4
		KIF2A
		RAD17
		SLC30A5
		MCCC2
		TBCA
		SERINC5
		XRCC4
		RASA1
		CCNH
		PAM
		APC
		YTHDC2
		DCP2
		MCC
		AP3S1
		PGGT1B
		TMED7-TICAM2
		SEMA6A
		COMMD10
		FSTL4
		CTNNA1
		CDC25C
		PCDHA2
		ANKHD1-EIF4EBP3
		PCDHGA1
		TCERG1
		HMGXB3
		SLC36A1
		RBM22
		ATOX1
		CYFIP2
		FBXW11
		STC2
		NSD1
		FAM193B
		HNRNPH1
		MAML1
		MGAT1
		RNF130
		CNOT6
		SDHA
		PDCD6
		EXOC3
		SLC12A7
		IRX4
		C5orf22
		SUB1
		AMACR
		RPL37
		PAIP1
		PELO
		DHX29
		IL6ST
		MAP3K1
		DIMT1
		SREK1
		PTCD2
		TNPO1
		FOXD1
		BTF3
		HMGCR
		AGGF1
		WDR41
		RPS23
		COX7C
		CETN3
		RHOBTB3
		ERAP2
		CHD1
		REEP5
		SLC12A2
		HINT1
		GDF9
		VDAC1
		TCF7
		SKP1
		SEC24A
		H2AFY
		SMAD5
		FAM53C
		EGR1
		SNHG4
		UBE2D2
		PURA
		WDR55
		DND1
		IK
		PCDHB13
		PCDHB12
		PCDHB11
		TAF7
		PCDHGB5
		HDAC3
		RNF14
		SLC26A2
		RPS14
		SYNPO
		GM2A
		MFAP3
		SAP30L
		MRPL22
		MED7
		PANK3
		FOXI1
		GABRP
		FGF18
		NPM1
		DUSP1
		RPL26L1
		MSX2
		DRD1
		NOP16
		HIGD2A
		LMAN2
		DDX41
		DOK3
		F12
		PRR7
		B4GALT7
		N4BP3
		ZFP2
		CANX
		SQSTM1
		SNORD96A
		GMDS
		RANBP9
		KIF13A
		CDKAL1
		ZSCAN31
		DST
		TRAM2
		PHIP
		MYO6
		MAP3K7
		AMD1
		KATNA1
		ESR1
		MAP3K4
		IGF2R
		PRPF4B
		CDYL
		RREB1
		HIVEP1
		JARID2
		E2F3
		KIAA0319
		BTN2A1
		ZNF184
		GRM4
		PPARD
		MAPK14
		SRSF3
		RNF8
		ZFAND3
		KCNK5
		TFEB
		UBR2
		PTK7
		RUNX2
		CD2AP
		MUT
		FBXO9
		ZNF451
		PRIM2
		PHF3
		SENP6
		ME1
		ZNF292
		ORC3
		UBE2J1
		CCNC
		ATG5
		PDSS2
		SEC63
		WASF1
		REV3L
		KPNA5
		TPD52L1
		ECHDC1
		PTPRK
		EPB41L2
		AKAP7
		MAP7
		MAP3K5
		PEX7
		PHACTR2
		PCMT1
		CCDC170
		SCAF8
		SYNJ2
		WRNIP1
		FAM50B
		SSR1
		EEF1E1
		TMEM14B
		SIRT5
		CD83
		TPMT
		DEK
		MRS2
		GPLD1
		TDP2
		HIST1H4A
		HIST1H2AC
		HFE
		HIST1H1E
		HIST1H1T
		HIST1H4D
		HIST1H3F
		HIST1H2BK
		HIST1H2AH
		PRSS16
		HIST1H3I
		RPS10
		SPDEF
		TAF11
		RPL10A
		TEAD3
		FANCE
		SRPK1
		MAPK13
		PIM1
		MOCS1
		NFYA
		TOMM6
		MED20
		BYSL
		GUCA1B
		PRPH2
		CNPY3
		GNMT
		PEX6
		KLHDC3
		PPP2R5D
		CUL7
		DNPH1
		SRF
		CUL9
		ABCC10
		POLH
		HSP90AB1
		CDC5L
		TNFRSF21
		CRISP3
		TFAP2B
		LOC730101
		ELOVL5
		BAG2
		LOC441155
		EEF1A1
		COX7A2
		HMGN3
		ELOVL4
		TPBG
		SYNCRIP
		LYRM2
		MANEA
		OSTM1
		SNX3
		ZBTB24
		MICAL1
		CDC40
		DDO
		TRAF3IP2
		MARCKS
		COL10A1
		TSPYL1
		HSF2
		HDDC2
		RPS12
		BCLAF1
		TNFAIP3
		REPS1
		SNORA29
		RNASET2
		C6orf120
		PSMB1
		AKR1B10
		CHN2
		AUTS2
		TRRAP
		SRPK2
		ORC5
		NRCAM
		MKLN1
		ATP6V0A4
		HIPK2
		PTPRN2
		PRKAR1B
		MAFK
		GNA12
		FBXL18
		ICA1
		PHF14
		ANKMY2
		SNX13
		RAPGEF5
		KLHL7
		SCRN1
		CDK13
		CAMK2B
		NPC1L1
		EGFR
		BAZ1B
		GTF2IRD1
		CLIP2
		POM121C
		UPK3B
		STYXL1
		SEMA3C
		ADAM22
		AKAP9
		LMTK2
		EPHB4
		AGFG2
		ALKBH4
		HBP1
		CAPZA2
		NDUFA5
		WASL
		SND1
		UBE2H
		NRF1
		KLHDC10
		CREB3L2
		TRIM24
		ADCK2
		CASP2
		PRKAG2
		DNAJB6
		VIPR2
		PDGFA
		SUN1
		INTS1
		CCZ1
		AIMP2
		C7orf26
		ZNF12
		PMS2CL
		CCZ1B
		C1GALT1
		NDUFA4
		BZW2
		TSPAN13
		CBX3
		HOXA6
		HOXA7
		AVL9
		KBTBD2
		KIAA0895
		TARP
		PSMA2
		UBE2D4
		H2AFV
		IGFBP3
		HUS1
		MRPS17
		CCT6A
		ZNF107
		ZNF117
		TMEM248
		ABHD11
		CLDN3
		PMS2P3
		DTX2P1-UPK3BP1-PMS2P11
		GATAD1
		RBM48
		SAMD9
		PMS2P1
		TFR2
		PCOLCE
		SAP25
		LRCH4
		SRRT
		SLC12A9
		TRIP6
		ACHE
		FIS1
		CLDN15
		AP1S1
		SH2B2
		ORAI2
		RINT1
		BCAP29
		DLD
		IMPDH1
		METTL2B
		MEST
		ZC3HAV1
		TTC26
		MRPS33
		SSBP1
		TAS2R3
		EPHA1
		CUL1
		ZNF783
		ATP6V0E2
		REPIN1
		KCNH2
		CDK5
		ABCF2
		RHEB
		XRCC2
		EN2
		VPS13B
		TNKS
		PCM1
		RBPMS
		FBXO16
		NCOA2
		MMP16
		PVT1
		MFHAS1
		MSRA
		DLC1
		TUSC3
		MTMR7
		PSD3
		SCARA3
		INTS9
		EXTL3
		DCTN6
		GSR
		RNF122
		TACC1
		FGFR1
		SLC20A2
		MCM4
		RAB2A
		CHD7
		MTFR1
		SULF1
		LACTB2
		UBE2W
		TPD52
		NBN
		CPQ
		NIPAL2
		MTDH
		RNF19A
		UBR5
		ATP6V1C1
		LRP12
		TRPS1
		EIF3H
		EXT1
		DSCC1
		PTK2
		ZC3H3
		CLN8
		MTMR9
		SH2D4A
		ATP6V1B2
		XPO7
		FAM160B2
		HR
		NUDT18
		POLR3D
		BMP1
		PPP3CC
		CHMP7
		SLC25A37
		NKX3-1
		STC1
		GNRH1
		PPP2CB
		BRF2
		DDHD2
		GOLGA7
		IKBKB
		VDAC3
		THAP1
		TGS1
		IMPAD1
		UBXN2B
		ARMC1
		RRS1
		C8orf44
		TMEM70
		ZC2HC1A
		RMDN1
		RIPK2
		CCNE2
		UQCRB
		PTDSS1
		RPL30
		OSR2
		POLR2K
		PABPC1
		YWHAZ
		ZNF706
		KLF10
		AZIN1
		DERL1
		WDYHV1
		TRMT12
		RNF139
		SQLE
		MIR1204
		PTP4A3
		JRK
		ARC
		LY6D
		EEF1D
		SCRIB
		PLEC
		OPLAH
		EXOSC4
		SLC52A2
		ZNF34
		RABGAP1
		IPPK
		ERP44
		PTPN3
		C5
		ASTN2
		PPP6C
		ADAMTS13
		KANK1
		NFIB
		MLLT3
		CAAP1
		NFX1
		DNAJA1
		UBAP1
		UNC13B
		PAX5
		PIP5K1B
		KLF9
		SMC5
		ZFAND5
		OSTF1
		VPS13A
		GNAQ
		TLE1
		NAA35
		HABP4
		TMOD1
		NCBP1
		GALNT12
		INVS
		FKTN
		PTBP3
		HSDL2
		BSPRY
		GSN
		NDUFA8
		GOLGA1
		PSMB7
		PBX3
		MAPKAP1
		ST6GALNAC4
		NUP188
		CRAT
		PTGES
		FNBP1
		ABL1
		NUP214
		PRRC2B
		DDX31
		NACC2
		MAN1B1
		EXD3
		SLC1A1
		ERMP1
		RANBP6
		PLIN2
		RRAGA
		RPS6
		KLHL9
		PLAA
		ACO1
		PTENP1
		GALT
		STOML2
		FAM214B
		VCP
		TESK1
		SPAG8
		CLTA
		GRHPR
		ALDH1B1
		RFK
		PSAT1
		HNRNPK
		CDK20
		GADD45G
		NFIL3
		ZNF484
		NINJ1
		FAM120A
		PHF2
		PTCH1
		XPA
		TRIM14
		ZNF189
		RAD23B
		TXN
		FKBP15
		ATP6V1G1
		TRAF1
		RAB14
		RC3H2
		ZBTB6
		GPR21
		LMX1B
		ZBTB43
		SLC2A8
		RPL12
		ZNF79
		CDK9
		C9orf16
		GOLGA2
		URM1
		GLE1
		SET
		TBC1D13
		ZER1
		DOLK
		ASB6
		TOR1B
		USP20
		GPR107
		REXO4
		SURF1
		SNORD24
		CACFD1
		BRD3
		PPP1R26
		CAMSAP1
		PMPCA
		SEC16A
		AGPAT2
		UAP1L1
		GRIN1
		NDOR1
		TOR4A
		MRPL41
		RPL36A-HNRNPH2
		TBL1X
		EDA
		DIAPH2
		ENOX2
		GYG2
		STS
		HCCS
		GPM6B
		AP1S2
		SCML2
		CDKL5
		MBTPS2
		PDK3
		SRPX
		USP9X
		KDM6A
		ZNF41
		PQBP1
		MAGED1
		HUWE1
		LAS1L
		OPHN1
		TAF1
		NONO
		OGT
		PHKA1
		PIN4
		SLC16A2
		ATRX
		APOOL
		KLHL4
		THOC2
		STAG2
		SLC25A14
		ELF4
		MBNL3
		GPC4
		CXorf40A
		MAMLD1
		MTM1
		SLC6A8
		MECP2
		HCFC1
		LOC389906
		PNPLA4
		TMSB4X
		GEMIN8
		MOSPD2
		CA5B
		RBBP7
		TXLNG
		PHKA2
		EIF1AX
		SMS
		PRDX4
		EIF2S3
		ZFX
		DYNLT3
		DDX3X
		USP11
		UXT
		CFP
		FTSJ1
		RBM3
		WAS
		HDAC6
		GATA1
		PCSK1N
		SLC35A2
		PIM2
		PLP2
		FOXP3
		CCDC22
		SYP
		FGD1
		UBQLN2
		ZXDB
		YIPF6
		FAM155B
		MED12
		ZMYM3
		RPS4X
		RLIM
		TAF9B
		PGK1
		TIMM8A
		ARMCX6
		ARMCX3
		ARMCX5
		BHLHB9
		TCEAL4
		MORF4L2
		TMSB15B
		TBC1D8B
		RBM41
		TSC22D3
		PSMD10
		ALG13
		IL13RA1
		PGRMC1
		NKRF
		NDUFA1
		RPL39
		LAMP2
		MAP7D3
		LDOC1
		IDS
		CXorf40B
		NSDHL
		BGN
		SRPK3
		IDH3G
		PLXNB3
		BCAP31
		ARHGAP4
		EMD
		DNASE1L1
		RPL10
		PLXNA3
		SNORA70
		IKBKG
		CMC4
		RSU1
		CAMK1D
		PRPF18
		MLLT10
		NSUN6
		JMJD1C
		ANK3
		SLC25A16
		KCNMA1
		RNLS
		ENTPD1
		NT5C2
		NSMCE4A
		ZMYND11
		LARP4B
		UPF2
		NMT2
		DCLRE1C
		STAM
		NEBL
		DNAJC1
		CCDC7
		ALOX5
		RASSF4
		PARG
		CCDC6
		HERC4
		RUFY2
		VPS26A
		H2AFY2
		UNC5B
		SGPL1
		PPP3CB
		ADK
		KAT6B
		DLG5
		ZMIZ1
		CCSER2
		LDB3
		PTEN
		ACTA2
		BTAF1
		MYOF
		PLCE1
		ALDH18A1
		TM9SF3
		ZNF518A
		MMS19
		ENTPD7
		ARL3
		SH3PXD2A
		XPNPEP1
		ACSL5
		TCF7L2
		RAB11FIP2
		GRK5
		FGFR2
		TACC2
		CTBP2
		MGMT
		INPP5A
		KLF6
		AKR1C1
		GDI2
		ITIH2
		GATA3
		CDC123
		RPP38
		MSRB2
		YME1L1
		ITGB1
		CUL2
		CREM
		BMS1
		CXCL12
		CSTF2T
		DKK1
		TFAM
		ADO
		NRBF2
		DNAJC12
		HNRNPH3
		SAR1A
		PPA1
		CHST3
		SPOCK2
		DNAJB12
		ECD
		MYOZ1
		ZSWIM8
		VDAC2
		RPS24
		ZCCHC24
		FAS
		IFIT2
		PPP1R3C
		CCNJ
		PI4K2A
		R3HCC1L
		HPS1
		COX15
		ERLIN1
		CWF19L1
		NDUFB8
		KAZALD1
		PDZD7
		NOLC1
		PSD
		NFKB2
		ACTR1A
		C10orf95
		PDCD11
		GSTO1
		SMNDC1
		BBIP1
		EIF3A
		TIAL1
		MCMBP
		SEC23IP
		C10orf88
		PPP2R2D
		BNIP3
		DPYSL4
		ADAM8
		TUBGCP2
		CYP2E1
		C11orf58
		PDE3B
		IPO7
		CTTN
		LRP5
		AAMDC
		TMEM135
		DEAF1
		KCNQ1
		NUP98
		APBB1
		LMO1
		PPFIBP2
		ST5
		TMEM41B
		ZBED5
		PRMT3
		LIN7C
		ELP4
		RCN1
		CSTF3
		CAT
		CAPRIN1
		PRR5L
		TRIM44
		TTC17
		TP53I11
		EXT2
		PRDM11
		CRY2
		AMBRA1
		MADD
		OSBP
		KDM2A
		CPT1A
		IGHMBP2
		CCND1
		PPFIA1
		NADSYN1
		FAM168A
		NEU3
		RSF1
		SYTL2
		PICALM
		EXPH5
		ATM
		DDX10
		ZW10
		SIK3
		TMPRSS4
		ARHGEF12
		NFRKB
		IGSF9B
		BET1L
		SIRT3
		RNH1
		PTDSS2
		CDHR5
		TMEM80
		POLR2L
		CEND1
		SNORA52
		AP2A2
		CDKN1C
		PHLDA2
		SLC22A18AS
		CHRNA10
		PGAP2
		RHOG
		TRIM22
		SMPD1
		TRIM3
		EIF3F
		AKIP1
		WEE1
		RRAS2
		ZDHHC13
		DNAJC24
		EIF3M
		TCP11L1
		NAT10
		ELF5
		APIP
		TRAF6
		API5
		PEX16
		MDK
		ARHGAP1
		ACP2
		CELF1
		NDUFS3
		MRPL16
		STX3
		CD5
		VPS37C
		TMEM258
		MYRF
		BEST1
		TUT1
		EML3
		UBXN1
		GNG3
		HNRNPUL2-BSCL2
		NXF1
		TMEM223
		TAF6L
		RTN3
		DNAJC4
		TRMT112
		ESRRA
		BAD
		SF1
		EHD1
		PPP2R5B
		VPS51
		ZFPL1
		SNX15
		CDC42EP2
		SSSCA1
		KAT5
		CCDC85B
		EFEMP2
		C11orf68
		DPP3
		RBM4B
		RCE1
		SYT12
		SSH3
		POLD4
		CORO1B
		PITPNM1
		ALDH3B1
		TCIRG1
		CHKA
		FADD
		KRTAP5-9
		NUMA1
		ARAP1
		COA4
		UCP3
		SPCS2
		RPS3
		SERPINH1
		ALG8
		TMEM126B
		CREBZF
		FZD4
		PANX1
		ANKRD49
		ENDOD1
		MTMR2
		MMP1
		CUL5
		FDX1
		PPP2R1B
		DLAT
		SDHD
		IL18
		CEP164
		SLC37A4
		RPS25
		NLRX1
		TRIM29
		EI24
		PUS3
		APLP2
		ST14
		ACAD8
		BICD1
		R3HDM2
		NR4A1
		MDM2
		NR2C1
		UTP20
		RBM19
		WSB2
		WNK1
		ERC1
		PARP11
		TSPAN9
		PLEKHG6
		CHD4
		LRP6
		ATF7IP
		DERA
		PLEKHA5
		RECQL
		ETNK1
		TM7SF3
		PPFIBP1
		CCDC91
		YAF2
		IRAK4
		ASIC1
		SMAGP
		KRT18
		ATF7
		PCBP2
		ITGA7
		ERBB3
		DCTN2
		PPM1H
		TBK1
		TBC1D30
		CCT2
		PPP1R12A
		CEP290
		ATP2B1
		POC1B-GALNT4
		PLXNC1
		UHRF1BP1L
		NUP37
		HSP90B1
		POLR3B
		CRY1
		UBE3B
		SSH1
		ATP2A2
		ARPC3
		RPL6
		HECTD4
		RNFT2
		MED13L
		HRK
		TAOK3
		RNF10
[truncated: 1,231 more rows]
