# Supplementary material
Source: publisher figshare collection journal article supplement (https://tandf.figshare.com/articles/dataset/_/11369025)
Supplement: Supplementary file 1 [file 1 › Supplementary Table 4.xlsx]

## Sheet: Feuil1
Genes upregulated by TGFb, in MCF10A		Genes unaffected by TGFb, in MCF10A		Genes upregulated by TGFb, in HepG2		Genes unaffected by TGFb, in HepG2
TGM2		A1CF		UBE2L6		TRIM52
ALOX5AP		A2M		EBAG9		SCAMP5
KANK4		A2ML1		TRIP13		SEC22C
ACKR3		A4GNT		ALDH3B1		PTTG1
SCG5		AAAS		SLC30A10		RGL2
POSTN		AACS		CD74		VEGFB
TAGLN		AADAC		VCAN		TRIP11
SPINK6		AADACL2		B9D1		CLCN6
LBH		AAED1		E2F2		POLD4
PMEPA1		AAGAB		TP53I3		LAIR1
SPOCD1		AAK1		FEN1		DIS3L2
WNT5B		AAR2		GPX2		FKBP14
ADAM19		AASDH		THADA		HNF4A
KCNJ15		ABCA10		TTYH1		TK2
SERPINE1		ABCA17P		NR1H4		PIGG
LMCD1		ABCA4		ZWINT		CLSTN1
AMIGO2		ABCA5		RUVBL1		STK25
PRSS23		ABCA7		ADH6		NCOR2
FOLR3		ABCA9		CHEK2		ZMYM1
NCF2		ABCB1		ATP6V0E2		TRIM10
CYR61		ABCB10		ARHGEF3		MED8
FBLN5		ABCB11		ALG8		PKD1L2
TPST1		ABCB5		AADAT		GFOD2
CTGF		ABCB9		TNFRSF19		TMEM80
		ABCC11		DCDC2		CD151
INHBA		ABCC13		GREB1		BAX
OLAH		ABCC4		KLHL5		OSGIN2
TUFT1		ABCC6		LACTB2		NISCH
GPAM		ABCC9		GINS2		SUPT5H
GLIPR1		ABCD2		LDLRAD1		BANP
TGFBI		ABCD4		ALPK2		PRKCSH
PDPN		ABCG2		MR1		BTBD7
FMN2		ABCG4		CENPM		IKBKB
TPM1		ABHD1		SLC25A11		PTBP2
CDH11		ABHD10		ASB9		LYN
NEDD9		ABHD11		ASPSCR1		CYP8B1
RFTN1		ABHD12B		PDZK1		CTSH
CYTH1		ABHD13		MIXL1		API5
CUX2		ABHD14A		CDCA7		CREB1
IGFBP3		ABHD15		TMEM185B		CREBBP
MYL9		ABHD17B		DHRS2		CCR6
MFAP5		ABHD2		EXOC7		MEIS2
SLC46A3		ABHD3		C1RL		DNMT3B
ATP6V0A4		ABI1		GMPR2		SLC25A1
CHRNA9		ABI2		CPN2		CRAT
DDAH2		ABI3		COMMD4		WDR48
IVNS1ABP		ABL1		CRELD2		EIF4EBP2
PDLIM7		ABL2		PRR15L		AP2S1
ARHGEF40		ABO		DMKN		DDIT3
PGM2L1		ABRA		PROM1		DYRK1A
TSPAN5		ACAA2		ACSS1		XAF1
C2CD4C		ACAD10		HP		DBI
LAMC2		ACAD9		GINS3		USP39
P4HA3		ACADL		DIO1		SF1
CTTNBP2		ACADVL		UROS		PRR7
LOC101928955		ACAN		CDCA3		MEMO1
VSTM2L		ACAP1		HNRNPA1		C2
DKK1		ACAP2		ACAD9		ZFX
ADAMTS6		ACAP3		PPP2R1B		EXT2
PTHLH		ACE		CDH15		ARID4B
NREP		ACE2		IL1R2		DNAJC25
LURAP1L		ACER1		FANCG		NSFL1C
FBN1		ACER3		TSPAN8		TTLL3
PLPP4		ACHE		ADAMTSL2		SDHA
CA8		ACMSD		RPS6KA3		PSMD13
PPP2R2B		ACO1		MCM2		DHDDS
MGLL		ACOT1		ONECUT1		LNPEP
PPBP		ACOT11		EVC		UXT
IL11		ACOT12		LGR5		SREBF1
KDELR3		ACOT13		S100A4		SNRPD3
ANO4		ACOT7		TFDP1		ANAPC11
SLC35F3		ACOT8		CHEK1		TRIM37
CRYAB		ACOX1		NRP1		SMARCA2
F3		ACP1		SH3BGRL		FAM104A
RUSC2		ACP2		DDC		KLF13
PDGFC		ACPP		MFF		PPP4R1
GLIPR2		ACPT		SCMH1		MRRF
SLC44A2		ACR		DKK1		DNM2
COL1A1		ACRBP		QPCT		ZNF32
AQP9		ACRV1		ACADM		PLAUR
SH2D2A		ACSBG1		C8B		HNRNPL
CDH2		ACSBG2		C6		LTA4H
DLC1		ACSF3		SERPING1		CDC42SE1
PDZK1		ACSL6		F11		LASP1
DIXDC1		ACSM1		GAMT		EXOSC9
CCBE1		ACSM2A		SGSH		PRPSAP2
FSTL1		ACSM2B		PAH		PKP4
RASSF8		ACSS1		LIPC		B4GALT2
FN1		ACTA1		LMBR1		SLC17A9
EPHB2		ACTA2-AS1		PLA2G2A		MTX2
SNAI2		ACTL7A		ALDH3A2		FBXO38
IGFBP7		ACTN2		SLC2A2		ZNF57
C4orf26		ACTN4		SERPINA7		MARVELD2
ITGA5		ACTR2		VSIG2		EIF2A
SMTN		ACTR3C		NFE2		DSP
COL4A1		ACTR6		COL4A5		OPA3
WNT5A		ACTR8		FGA		TRIT1
TMEM54		ACTRT1		SMC4		GNG10
LINC01133		ACTRT2		VWF		ATP6AP1L
PHLDB1		ACVR1B		PLP1		RSRC1
CGB3		ACVR1C		TTC8		ZNF700
LIPG		ACVR2A		TUBB1		ACADS
SOX4		ACVRL1		CCDC34		JDP2
SPANXA1		ACY3		GDPD5		TOR2A
HS3ST3A1		ADA		SPP1		IL17RA
PALLD		ADAD1		HPX		EDA
FAM167A		ADAD2		ADH5		EEF1D
KRT34		ADAL		ALDH2		RAP2C
GADD45B		ADAM11		CYP3A43		WRNIP1
SAMSN1		ADAM18		C4BPA		ATXN2L
ZSWIM6		ADAM2		PEG10		ATRIP
SPHK1		ADAM20		RGL1		SP3
CSF1R		ADAM21		MDK		GPC3
TNS1		ADAM22		CRIP2		G3BP2
NT5E		ADAM29		KANK4		YBX1
MYO7B		ADAM32		MMACHC		SH3BP5L
THBS1		ADAM5		NAT8		MOSPD3
MLLT11		ADAM6		SLC29A1		KCTD14
TMSB15A		ADAM7		NME7		MRPS34
VASN		ADAM9		POP5		DDRGK1
SLC39A13		ADAMDEC1		FGD3		ZNF266
DCLK1		ADAMTS10		TPCN2		JMJD8
EML1		ADAMTS12		ANTXR1		NOS1AP
COL8A1		ADAMTS13		ID1		IP6K2
CCDC80		ADAMTS14		NMRAL1		ZFR
HSD17B2		ADAMTS15		ACOX2		ENTPD6
TMCC1		ADAMTS16		TRIM50		TAOK3
TNFRSF12A		ADAMTS17		RAD54L		SLC39A4
GFPT2		ADAMTS18		ANXA9		RAB23
SHISA9		ADAMTS19		CREG1		STX7
FGF2		ADAMTS3		RFC3		PCYOX1
ARSI		ADAMTS7		HSD17B6		HSD17B11
GNG11		ADAMTS8		THBS1		ACSL5
LRRC8C		ADAMTS9		LEFTY2		NSUN5
TUBB2A		ADAMTS9-AS2		NOTUM		SNX1
ARL4C		ADAMTSL1		TK1		SP4
ATP8A2		ADAMTSL3		TFF3		TUBE1
FNDC4		ADAMTSL5		MARCH3		OXER1
FSTL3		ADAR		TCEA3		AKAP11
NAV1		ADARB2-AS1		SPINK1		DHRS7
HECTD2		ADAT1		KLK6		JMJD1C
NUAK1		ADAT3		TMEM45A		BCL2L1
MIR22HG		ADCK5		CPS1		SEC31A
CD24		ADCY1		SDSL		CPSF2
MCAM		ADCY10		PRMT6		VPS28
MAGED2		ADCY10P1		ASF1B		DDX41
ABTB2		ADCY2		PCOLCE2		RAPGEF6
LHB		ADCY4		RAD51AP1		CTDSPL2
MLPH		ADCY5		CYGB		AP2A1
PXDC1		ADCY6		RBP1		RAB24
RASSF8-AS1		ADCY9		MCM7		ANKFY1
LPXN		ADCYAP1R1		SULF2		INPP5K
APCDD1L		ADD1		SIRPA		EIF4ENIF1
S1PR1		ADD2		COL4A6		MRPL10
TPM4		ADD3-AS1		SAA4		PROS1
MRAP2		ADGRA1		ABCC6		TCF12
SKIL		ADGRE1		MERTK		GPR89B
KIAA1549L		ADGRE4P		SBK1		ATPIF1
CDH4		ADGRE5		USP48		LCMT1
CD163L1		ADGRF1		RBKS		SDCBP
ADRA2C		ADGRF2		MYO5C		ZSCAN2
HMOX1		ADGRF3		C1S		SCCPDH
GPR68		ADGRF5		TMSB4X		UTP18
COL4A2		ADGRG2		SCGN		ZC3H14
HYI		ADGRG3		BEX1		RBMX2
CD59		ADGRG4		MAT2B		OTUD6B
COL1A2		ADGRG5		RBM3		LUC7L2
C16orf45		ADGRG7		PLEKHB1		EXOSC1
PRR5L		ADGRL3		CHDH		FAHD2A
LOC401472		ADGRL4		FAM3B		ZDHHC9
FAP		ADGRV1		SPTLC3		MRPS18C
MAGED1		ADH4		CDCA5		DHX16
MBOAT2		ADH5		POLR3H		YPEL5
FRMD6		ADH6		SNX5		CDK5RAP1
C12orf75		ADI1		RARRES2		MRPS23
IL32		ADIG		FAM111A		PTRH2
AFAP1L2		ADIPOQ		DCBLD2		EIF3L
DOCK2		ADIPOR1		POLA2		RBM7
PLOD2		ADNP		PGC		RPL26L1
CHST11		ADNP2		MCM4		COMMD2
SEMA7A		ADORA1		PAQR9		ZNF706
DGKI		ADORA2A		HADH		FASTKD1
GDPD3		ADORA2A-AS1		NKD1		NOL3
GGTLC1		ADORA3		CCDC102A		NDUFA10
PLD5		ADPRH		RELN		KCTD3
PF4		ADPRHL1		ADAM19		ASB3
KIAA1644		ADPRHL2		FOXQ1		NUB1
SMAD7		ADPRM		AGTRAP		RWDD1
PRUNE2		ADRA1A		IVD		MRTO4
PTPRK		ADRA1D		FANCD2		HN1
CATSPER1		ADRA2B		SLC45A3		TOP1MT
RGS18		ADRB1		MCM3		PWWP2A
MSANTD3		ADRM1		MAD2L1		SDHD
NLRP3		ADSSL1		MATN3		ATG4A
CDK14		AEN		KRT19		ANKS3
ETS1		AES		ITPR2		HEBP2
UGP2		AFAP1L1		KIAA0101		MAX
EFR3B		AFDN		RNF144A		MGA
WIPF1		AFF1		DLGAP5		TMEM109
B3GNT2		AFF3		TRMT5		ASB8
SEC23A		AFF4		GJC2		FRRS1
PRKCDBP		AFMID		PPIC		LIMK2
MB21D2		AFTPH		CHPT1		SH3KBP1
IL15		AGA		TMEM14A		HOXA6
EVA1A		AGAP1		EPHA1		DCUN1D5
FAM89B		AGAP2		RRM2		PDCL3
PEA15		AGAP3		AKR1D1		SECISBP2
SLC16A2		AGBL1		HMGN2		TUBB
SERPINE2		AGBL3		FABP5		KDELR3
NAGK		AGBL4		SULT1C2		RRAGB
TUBA8		AGBL5		BGN		MRPS30
PSG8		AGFG2		FRAS1		ARL6IP4
PAPSS2		AGK		CCND2		OCRL
NCK2		AGMAT		CAT		WAC
IGF2BP3		AGMO		ODAM		FAM49B
SNAI1		AGO1		COL16A1		MRPL14
LARP6		AGO3		PALMD		KLHL8
TSHZ1		AGO4		TYMS		HDHD2
MAGEH1		AGPAT2		SERPINA3		ENOPH1
NOX5		AGPAT4		FAM43A		NFX1
SDC2		AGPS		FNDC5		MNX1
SPANXD		AGT				TMEM14C
CASC15		AGTPBP1				FRMD8
TMEM2		AGTR2				MRPS5
NEDD4		AGXT				SYT15
FAM177A1		AGXT2				UFM1
TP53I3		AHCTF1				PCBP2
SPARC		AHCYL1				EIF4H
IRS2		AHI1				IP6K1
GNPNAT1		AHNAK2				MAPK8IP3
MMP19		AHRR				TTC9C
SH3RF1		AHSG				FLOT1
CALU		AHSP				PIPOX
EVA1B		AICDA				MRPL27
DUSP10		AIFM3				NOP14
TBX3		AIM2				PTPRK
ANO6		AIP				SIRT7
B3GLCT		AIPL1				ETF1
DAW1		AJAP1				MAP3K4
PGM3		AK1				BET1L
TGFB1I1		AK6				TPM1
KLF2		AK8				ARSA
AMOTL2		AK9				USP7
TTPAL		AKAP10				PHF23
NKX3-1		AKAP11				YY1AP1
NAV3		AKAP13				MEA1
SLC8A1		AKAP14				VPS26A
ENKUR		AKAP3				AIF1
PORCN		AKAP4				PCSK5
PAGE5		AKAP5				SLC43A1
GOSR2		AKAP6				ERAP1
COL4A4		AKAP8L				VRK3
KATNAL1		AKAP9				RNF141
SLC22A4		AKIRIN2				UFC1
SLIT3		AKNA				TMEM206
TRAM2		AKNAD1				ZNF576
FOXD1		AKR1A1				ATAD1
ITGB6		AKR1C1				BRCC3
SNTA1		AKR1C3				ZNF557
NLRP1		AKR1C4				PLEKHF1
PCDH1		AKR1D1				SLC16A4
KLHL25		AKR1E2				IDH3B
BVES		AKR7A2				TMEM216
LIMA1		AKR7A2P1				RNF181
SAMD4A		AKR7A3				ORMDL1
MRAS		AKR7L				WDR33
TMEM104		AKTIP				KREMEN2
DNAJB5		ALAD				LRFN3
LCE3D		ALAS1				ZNF789
NECTIN4		ALAS2				ITCH
PLAUR		ALB				FAM103A1
SPOCK1		ALDH1A2				ARHGAP17
ATP1B1		ALDH1A3				ZMIZ2
PSG6		ALDH1B1				GMEB1
HHIP		ALDH1L1-AS2				TCEAL8
LOC105372321		ALDH1L2				AIFM2
TAGLN2		ALDH2				AZIN1
MMD		ALDH3B2				ZNF329
DKK3		ALDH8A1				HDGF
BPGM		ALDOA				DHX40
SLA		ALDOB				HSPBAP1
SMURF2		ALG1				NLRX1
SLC25A24		ALG10				SULT1C4
SV2B		ALG10B				TFPT
CSRP2		ALG13				ACSS3
MICAL2		ALG14				FAM118B
HAS2		ALG1L				FBXL6
ENC1		ALG5				CARS2
FLRT2		ALG8				TMEM53
PNMA1		ALG9				EPB41L2
C5orf46		ALKBH1				HTRA2
CST6		ALKBH5				LMNB1
COPZ2		ALKBH6				CLMN
MYL2		ALKBH8				OXR1
SH3KBP1		ALLC				ALG9
DCBLD1		ALMS1				SHCBP1
GLS		ALMS1P1				TLE6
PDCD1LG2		ALOX12				DHRS12
AXL		ALOX15				SEH1L
LOC284344		ALOXE3				MPST
GAS6		ALPI				KRIT1
PTGS2		ALPK1				RPS19
RNF150		ALPK3				THRAP3
ACTN1		ALPL				FBN3
TRIML2		ALPPL2				MRPS15
MOXD1		ALS2				SH3BGRL3
P4HA2		ALS2CL				CDK7
VGLL3		ALS2CR11				INO80B
PSORS1C1		ALS2CR12				ZSWIM7
CMTM3		ALX1				NUDT15
IQGAP2		ALX3				SNAP47
LTBP2		ALX4				NRSN2
MYL6		AMACR				SLC25A28
LCP1		AMBN				HDHD3
PPARD		AMBP				SHMT2
GPSM1		AMBRA1				FBXW4
PLXNA2		AMD1				LAS1L
HOMER3		AMDHD2				CCT7
ADAMTS1		AMELX				ZYG11B
FARP1		AMELY				ANKHD1
ANGPTL4		AMER2				SETD6
ITGB5		AMER3				SLC35E1
C3orf18		AMH				NT5C
OSTM1		AMHR2				ZNF672
FAM114A1		AMIGO1				OAS1
HS3ST2		AMMECR1L				ZNF669
ZNF365		AMN1				CBLL1
SOCS2		AMOT				SCO2
TMSB15B		AMOTL1				SHOC2
KIFC3		AMPD2				ZNF33A
FBXO32		AMPH				MXD3
ORMDL2		AMZ2				DOHH
SERPINB7		ANAPC1				SRD5A1
MATN3		ANAPC10				MLLT10
LAMA3		ANAPC16				SEC24B
MCF2		ANAPC2				CLUAP1
SUSD5		ANAPC4				CEP63
VEGFC		ANAPC5				PSPC1
PINK1		ANAPC7				ZNF205
GPR180		ANGEL2				AFMID
AAMDC		ANGPT1				ABHD12
RHOBTB1		ANGPT2				SUMF2
GRB10		ANGPTL1				ZNF565
ITGB3		ANGPTL2				CAST
RAB15		ANGPTL3				TNFAIP8
PLPP3		ANGPTL6				AGAP6
PLEK2		ANGPTL7				TTC4
TUBA3C		ANGPTL8				CCDC117
SLC45A3		ANHX				PPP2R1A
DAAM1		ANK1				FEZ2
MFAP2		ANK3				RRBP1
LGALS1		ANKAR				CRTC3
DUSP23		ANKFY1				SLC38A1
TUBB3		ANKIB1				SNRNP27
CCDC85A		ANKK1				TBC1D22A
PLEKHO1		ANKLE1				MBNL3
PDXK		ANKMY2				IL17RC
TACC1		ANKRA2				UHRF1BP1L
MARCH2		ANKRD18A				ALG3
FYN		ANKRD18DP				TLK2
IVL		ANKRD19P				AKAP8L
TMEM121		ANKRD20A12P				NKIRAS2
PIK3CD		ANKRD20A2				SLC39A7
ST3GAL1		ANKRD20A5P				MFSD5
GPX8		ANKRD20A8P				ATP2B4
SLC35G2		ANKRD24				NEDD4
DNAJB4		ANKRD28				EIF3J
CADM3		ANKRD30B				SMPD1
CSRP1		ANKRD30BL				CDC25C
RABGEF1		ANKRD30BP2				KRT8
DCUN1D3		ANKRD30BP3				FNTA
CCDC74B		ANKRD33				APTX
TOM1		ANKRD33B				DDX51
MEI1		ANKRD34C-AS1				SH2B1
SPECC1		ANKRD36B				CCNDBP1
P3H1		ANKRD36BP2				NSUN2
MSRB3		ANKRD39				LIPT1
ROBO4		ANKRD40				STX16
B3GALT4		ANKRD42				SSR4
GBP1		ANKRD44				VAMP7
TSC22D2		ANKRD45				ATP5S
JUN		ANKRD49				ZNF514
NEXN		ANKRD50				LIMS1
SOCS1		ANKRD54				NDUFS4
MCRIP1		ANKRD6				TNNI2
GNB4		ANKRD7				NR5A1
TUBA4A		ANKS1B				MARK2
TMEM263		ANKS3				PDIA4
KLF17		ANKS4B				SNX10
ALCAM		ANKUB1				TROVE2
MARCH4		ANO1				PREPL
GBP3		ANO3				MOSPD2
SKI		ANO7				PDE9A
MEX3B		ANO8				ATP5J2
LINC00842		ANP32A				MRPL33
DBN1		ANP32A-IT1				GAL3ST1
FXYD5		ANP32E				BAG5
PRICKLE2		ANPEP				ZNF3
ACTG2		ANXA13				HOMER3
CDA		ANXA4				LYAR
CD68		ANXA7				PEF1
POPDC3		ANXA9				CIAO1
MICAL1		AOAH				PUS7
SAMD11		AOC2				PEX16
PLCB4		AOC3				SYMPK
RBPJ		AP1B1				PRMT3
FGF1		AP2A1				SCOC
METRNL		AP2A2				SH3D19
OPN3		AP3B1				PTK7
FAM214B		AP3D1				MEPCE
FBLIM1		AP3M1				TBRG4
IL1R2		AP3S1				TMEM208
GNG4		AP3S2				BCL7C
KLF4		AP4B1				MATR3
MYADM		AP4E1				PTPMT1
TMCC2		AP4S1				KIF3B
CHST2		AP5S1				TXNL1
LINC00968		AP5Z1				SPOPL
CREB3L2		APBA1				GPN1
SLC22A5		APBB1IP				ITGAV
LOC728392		APC				ITIH5
SELM		APCS				KLHL26
DAB2		APEX2				PES1
TNC		APH1A				UBA52
AKAP2		APITD1				TRAF6
EPHA3		APLF				WRB
CDKN2D		APLN				TACC2
LIMD2		APLNR				TSPAN7
GPR143		APMAP				IKBKAP
LINC00312		APOA1				STX4
FERMT2		APOA2				STAU1
TMSB4X		APOA4				TJP1
RAB11FIP5		APOA5				RFWD2
GPR1		APOB				NUP214
PCDH9		APOBEC1				CDC23
CHST7		APOBEC3D				RAB3IP
LPAR5		APOBEC3H				USP11
PFN4		APOBR				CBWD3
CCL20		APOC1				SLC25A29
LINC00152		APOC2				TOMM5
GPR17		APOC4				IL18BP
BMT2		APOD				ATE1
MICALCL		APOF				ATP5C1
CLCF1		APOH				ZBTB22
ITGAV		APOL1				FAM114A1
QSOX1		APOL2				ELF1
UBASH3B		APOL3				RPL3
B3GNT9		APOL4				HNF1A
PLAU		APOL6				PPARA
SYNPO		APOM				GK5
GCNT1		APOPT1				PLS1
ZBED2		APPBP2				AGFG1
ZNF697		AQP10				AP3S2
DCBLD2		AQP12A				PSPH
BMPR2		AQP12B				RPS6KA3
SMG1P2		AQP2				RABGGTA
WNT7A		AQP4-AS1				PEX14
ZNF185		AQP5				SREBF2
YIPF5		AQP6				NARS
E2F7		AQP7				NFKBIE
EPOR		AQP7P1				NFATC3
PSG4		AR				NDUFB10
MYOM3		ARAP1				VEGFA
TG		ARAP2				GPS2
FAM225B		ARC				SLC35C1
ZFP36L1		ARF1				PRAP1
USPL1		ARF3				CCNT2
ABR		ARF5				NR2C2
C6orf1		ARF6				DUSP9
TOX2		ARFGAP2				BPTF
SUSD4		ARFGEF1				EPHB4
HOXB2		ARFGEF3				EPRS
DNAJB2		ARFIP2				PAQR4
CHPF2		ARFRP1				E4F1
MPRIP		ARGLU1				PHC1
CLEC18B		ARHGAP1				EFNA1
SYDE1		ARHGAP11A				CMTM3
NXPE3		ARHGAP15				RCAN1
SGK1		ARHGAP19				ZSWIM3
INF2		ARHGAP20				AKAP10
CTSV		ARHGAP23				SEC63
CTSB		ARHGAP24				POLG2
KIF3C		ARHGAP25				PRAF2
DLGAP4		ARHGAP26				PRR4
MARCKS		ARHGAP27				LYPLA2
SPRR2G		ARHGAP28				EXOC3
EPB41L5		ARHGAP30				GABARAP
ELK3		ARHGAP33				TWF2
C12orf54		ARHGAP4				NPTN
EDN1		ARHGAP44				RPS6KC1
IGF2		ARHGAP5				RSU1
WNT3		ARHGAP9				USP21
SLC30A4		ARHGEF1				NAPA
CD63		ARHGEF10				GFOD1
CCNJL		ARHGEF12				ZNF26
RRAS		ARHGEF15				CSDE1
FPR1		ARHGEF17				VCP
WSB2		ARHGEF2				UTRN
SETBP1		ARHGEF25				ZNF75D
DOCK10		ARHGEF26				ABCF2
PHTF1		ARHGEF28				UBTF
SMARCA1		ARHGEF39				CCDC124
P3H3		ARHGEF6				ELK1
ARF4		ARHGEF7				MVK
RABAC1		ARID1A				AEBP2
PLEKHA1		ARID1B				ODF2
IFFO1		ARID2				PITRM1
MELTF		ARID3A				FDXACB1
HTRA1		ARID4B				ACSS2
PPP1R3C		ARID5A				TWF1
DLX1		ARIH1				NUPL2
EPHX3		ARIH2				PSEN1
MYOT		ARL11				DLST
CASC10		ARL14EP				STIL
PPP2R5B		ARL17B				SEC14L1
ARHGEF18		ARL17B///ARL17A				PSMD12
MN1		ARL3				SNTA1
WDR66		ARL5A				SNRPG
LTBP1		ARL5B				SNRPN
PODNL1		ARL6IP4				SNRPB2
PSMD2		ARL6IP5				SMARCA1
COL7A1		ARL6IP6				SMARCB1
TENM2		ARL8A				SKI
C15orf52		ARL8B				APP
AKAP12		ARMC10				SLCO4C1
TMEM132A		ARMC12				OTUD5
ZSWIM7		ARMC2				SHARPIN
HSD11B1		ARMC4				CLCN7
FHL2		ARMC9				MACF1
TMEM176B		ARMCX1				ADAT1
RHBDF1		ARMCX3				PRDX5
HOXC9		ARMCX4				AP3M1
RASSF7		ARMCX6				FAM98C
HHAT		ARMT1				TMEM167A
TGFBR1		ARNTL2				PSMA3
EHD3		ARPC1B				OAZ2
MOB3B		ARPC4-TTLL3				FRMD3
PDE2A		ARPC5L				CCDC107
FZD2		ARPIN				AGBL5
IGFL2		ARPP21				MTHFD1L
TBXA2R		ARR3				LOC100130476
ACTBL2		ARRDC3				HMGB3
SLC2A6		ARRDC5				FBXO8
SERPINB5		ARSF				SRF
TMEM154		ARSG				IFITM3
SPSB1		ART1				SAP30BP
MAP1B		ART3				ZNF674
VCAN		ART5				DNPEP
ALPK2		ARX				CD2AP
RHOC		AS3MT				CHORDC1
ASTN2		ASAH1				SERGEF
ADGRF4		ASAH2				QKI
ADRB2		ASAP1				FAF1
CRHR1		ASAP1-IT1				LSR
MARCKSL1		ASAP3				PTP4A3
STARD13		ASB10				WDR45
ATL1		ASB11				DEF8
ITPRIP		ASB12				ARFGAP2
AOX1		ASB14				SDF2
SLAMF9		ASB3				PYGL
PARVA		ASB4				HBP1
ORAI2		ASB5				RNF4
APBB2		ASB6				ZNF550
LAMB3		ASB7				PTRF
GPRIN1		ASB8				BRF1
C15orf65		ASCC3				SHF
RIMBP3		ASCL1				TMEM209
SERTAD1		ASCL2				NUP93
PTPRF		ASCL3				ZMYND8
IER3		ASF1A				PLTP
ADAMTSL5		ASH1L				TNFSF10
CREB3		ASH2L				MGST1
NCEH1		ASIC3				PLA2G4B
CLIC3		ASIC5				GMEB2
SHISA4		ASIP				FBXW11
CRLF1		ASMT				SLC39A6
TRIO		ASNSD1				ARL1
LHFPL2		ASPA				PIGN
SNHG18		ASPDH				PLA2G15
SEMA3C		ASPG				LSM5
ACKR1		ASPH				MMD
ANTXR2		ASPM				AGL
ABAT		ASPN				PCID2
LFNG		ASRGL1				ABCD1
RIMS2		ASTL				A2M
FUT4		ASTN1				CLCN5
VAT1		ASXL1				ARSB
MMP2		ASXL2				ARSE
C1QTNF2		ASXL3				HNRNPR
C8orf34		ASZ1				RPS16
WDTC1		ATAD3A				SLC39A14
TIMP2		ATAD3B				USF2
FAM101B		ATAT1				PGPEP1
LHFP		ATCAY				FAH
ACTN3		ATF2				G6PC
SERINC1		ATF3				ARL16
SMIM3		ATF5				FUCA1
STX5		ATF6B				GCH1
KLF12		ATF7IP				ATG3
LDLRAD4		ATF7IP2				POLR1E
APC2		ATG10				MRPS25
PAX8		ATG14				SIL1
LHX6		ATG16L1				AKTIP
RSPH9		ATG2A				HACE1
BMP6		ATG2B				INPP5A
LPIN2		ATG3				NME1
MXRA7		ATG4B				OAT
CSRNP1		ATG4C				PDHA1
MEIS3		ATG4D				ADAMTSL4
AKT3		ATG7				TTC23
MAGI3		ATG9A				ITGB2
GSN		ATG9B				ITPRIPL1
CFL2		ATIC				FAM136A
FNDC3B		ATL2				PHKB
SLC26A2		ATL3				PJA1
DPT		ATM				ATL2
		ATMIN				PKLR
		ATN1				ABCG5
		ATOH1				WDSUB1
		ATOH7				DTX2
		ATOH8				HS1BP3
		ATP10A				UBE2V1
		ATP10D				PTS
		ATP11A				HEATR5B
		ATP11B				PPOX
		ATP11C				PIK3C2A
		ATP12A				TPI1
		ATP13A4				CLEC2D
		ATP13A5				BLMH
		ATP1A2				EPS15L1
		ATP1B2				NEU1
		ATP1B4				MRPL55
		ATP23				KRT10
		ATP2A1				PPP4R4
		ATP2A2				ALB
		ATP2B2				GGT1
		ATP2B3				MGAT4B
		ATP2B4				BARD1
		ATP2C1				ZNF585A
		ATP4A				CRYBB2
		ATP4B				CYP1A1
		ATP5H				F2
		ATP5J2				FGG
		ATP5L				CYP21A2
		ATP5S				TMEM64
		ATP5SL				VHL
		ATP6AP1				MAN2B1
		ATP6AP2				PDRG1
		ATP6V0B				ANKRD13C
		ATP6V0C				CCDC130
		ATP6V0CP3				AKNA
		ATP6V0D2				ILKAP
		ATP6V1B1				FBXO46
		ATP6V1C1				HM13
		ATP6V1C2				CEPT1
		ATP6V1E1				ZNF518A
		ATP6V1F				PMS2CL
		ATP6V1H				PLEKHA3
		ATP8A1				ING3
		ATP8B1				GNL3L
		ATP8B4				VPS33A
		ATP8B5P				SERF1A
		ATP9A				TCP1
		ATP9B				RAPH1
		ATPAF2				NCK2
		ATRIP				ZNF83
		ATRN				ZCWPW1
		ATRX				MARCH7
		ATXN1L				ARMCX5
		ATXN2L				ITPRIP
		ATXN3				LRRC14
		ATXN3L				CDK5RAP2
		ATXN7L1				RAB13
		ATXN7L2				BCAP29
		AURKA				MORF4L1
		AURKB				AP1S2
		AURKC				HIC2
		AVIL				CUL9
		AVL9				RRP1B
		AVPR1A				MYCBP2
		AVPR1B				TBC1D9B
		AVPR2				PDXDC1
		AXDND1				ZHX3
		AXIN2				XPO7
		AZU1				COPS7B
		B2M				EXOSC7
		B3GALNT1				FIP1L1
		B3GALNT2				IGF2R
		B3GALT2				TMEM14B
		B3GALT5-AS1				SBF2
		B3GALT6				RNF38
		B3GAT1				MPHOSPH9
		B3GAT2				RAB1B
		B3GAT3				AEN
		B3GNT4				FNDC3B
		B3GNT6				ITM2C
		B3GNT7				FAM160B2
		B3GNT9				CCDC14
		B3GNTL1				RNF130
		B4GALNT2				KIF13B
		B4GALNT3				RPRD2
		B4GALT1				CTBP1
		B4GALT2				ZCCHC11
		B4GALT3				CLASP1
		B4GALT6				ADAR
		BAALC				SECISBP2L
		BAAT				DDX19A
		BACH1				DLEU1
		BAG3				CLCC1
		BAG4				YIPF1
		BAG5				WDR43
		BAG6				SNX13
		BAGE				DCUN1D4
		BAGE4				DCP1B
		BAHD1				DCTD
		BAIAP2				ARL6IP1
		BAIAP2-AS1				XPO6
		BAIAP2L1				METAP1
		BANK1				ANKRA2
		BANP				PHF3
		BAP1				RSRC2
		BARHL1				UPF3A
		BARHL2				KPNA2
		BARX2				ICAM3
		BATF				SNORD56
		BATF2				DUS4L
		BAZ2B				RPL18
		BBS10				PIGV
		BBS2				MCF2L
		BBS5				TM2D1
		BBS7				TMEM165
		BCAN				CRADD
		BCAP31				YAF2
		BCAR4				CCDC28A
		BCAS1				DNAJC21
		BCAS2				TMEM87A
		BCAS3				SH2D5
		BCAS4				ME2
		BCAT1				TFG
		BCCIP				SUPT6H
		BCDIN3D				EVPL
		BCKDK				CRLF3
		BCL11A				CHUK
		BCL2				CPEB4
		BCL2L12				INTS5
		BCL2L13				AHCYL2
		BCL2L14				LARP1
		BCL7B				VPS8
		BCL9L				FOXP4
		BCLAF1				NUP188
		BCO1				ADNP
		BCO2				YIPF3
		BCOR				SAT2
		BCORL1				N4BP2L2
		BCORP1				RAI1
		BCR				CAMK2G
		BDH2				NACA
		BDKRB1				BRPF3
		BDNF				LDLRAP1
		BDP1				WSB1
		BEND2				DTWD1
		BEND3				PHF19
		BEST1				ZNF331
		BEST3				TOR1AIP1
		BEST4				YME1L1
		BEX4				AP4B1
		BFAR				ZNF451
		BFSP2-AS1				UPF2
		BHLHE22				RPAP1
		BHMT				AKR1A1
		BHMT2				RNF167
		BICC1				CLK2
		BICD1				PRDX1
		BICD2				RPS6KB2
		BID				ZFP91
		BIN2				ASB6
		BIN3				ATRN
		BIN3-IT1				RANBP10
		BIRC5				BIRC7
		BIRC6				PPARG
		BIRC7				BID
		BIRC8				TMEM129
		BIVM				CDC40
		BLACAT1				TMEM134
		BLK				TRIM24
		BLOC1S5				UBR5
		BLOC1S6				CNBP
		BLVRA				OTUB2
		BMI1				CUTA
		BMP1				SNX4
		BMP10				THG1L
		BMP15				GLTSCR2
		BMP5				RRM2B
		BMP7				RRP7A
		BMP8A				GLS2
		BMP8B				NR2C1
		BMPER				FAM72A
		BMPR1A				DPYSL2
		BMPR1B				PAFAH1B2
		BMS1				MAPK7
		BMS1P20				ITGA10
		BMS1P5				TBL1X
		BMS1P6				SLC27A2
		BMX				CAMK1
		BNC2				RAE1
		BNIP3				GGT7
		BNIPL				RSPRY1
		BOD1				SMURF1
		BOD1L1				ATF7IP
		BOLA2-SMG1P6				SLC35C2
		BORCS5				PIGT
		BORCS6				NOP58
		BORCS7				NEK8
		BORCS8-MEF2B				MRPL4
		BPI				P2RY8
		BPIFA1				USP9X
		BPIFA3				POLDIP3
		BPIFA4P				STK24
		BPIFB1				PIP5K1B
		BPIFB4				MTFMT
		BPIFB6				BTBD3
		BRAP				GCC2
		BRCA2				ZGPAT
		BRCAT54				CPNE3
		BRD2				NAE1
		BRD4				FUBP1
		BRE				WDR36
		BRF1				PRPF4B
		BRF2				GYG2
		BRINP1				BUD31
		BRINP3				USP13
		BRK1				SKAP2
		BRMS1				PQBP1
		BROX				DPM1
		BRPF1				TMEM11
		BRS3				ASAP2
		BRSK2				HDAC3
		BRWD1				EXOC1
		BRWD3				DEDD
		BSN-AS2				NACC2
		BSND				ADHFE1
		BST1				FAM76B
		BTAF1				CHCHD4
		BTBD1				FADD
		BTBD18				ADAM15
		BTBD9				DPP9
		BTC				SSNA1
		BTG3				ALDH4A1
		BTG4				CHRD
		BTK				SOCS1
		BTN2A2				TNKS
		BTN2A3P				USO1
		BTN3A1				HYAL2
		BTNL10				EDF1
		BTNL3				EIF3G
		BTNL8				EIF3F
		BTNL9				RPIA
		BTRC				EIF3B
		BUB1				SPTBN1
		BUB1B				STXBP4
		BUB3				TPR
		BYSL				TSPAN4
		BZW1				TEAD3
		C10orf11				GMCL1
		C10orf111				ADAM17
		C10orf128				TBCC
		C10orf53				RPAIN
		C10orf62				TRIM21
		C10orf67				SPG7
		C10orf71-AS1				SORL1
		C10orf76				TSPAN33
		C10orf82				MTCH2
		C11orf1				ZNF134
		C11orf21				PBRM1
		C11orf44				RASSF7
		C11orf45				FZD5
		C11orf58				PTP4A1
		C11orf65				NRIP1
		C11orf72				SLC7A5
		C11orf74				CUL5
		C11orf80				XPO1
		C11orf87				STT3B
		C11orf88				ZKSCAN2
		C11orf97				IGF2BP1
		C12orf29				UBE2V2
		C12orf40				TYK2
		C12orf42				ATP6V1E1
		C12orf43				VBP1
		C12orf50				VAV2
		C12orf56				PGAM1
		C12orf60				TMEM126B
		C14orf1				TRPC1
		C14orf119				RAB42
		C14orf144				MREG
		C14orf177				TRMU
		C14orf178				MALT1
		C14orf39				ZNF358
		C14orf80				CXXC1
		C15orf32				RBM28
		C15orf38-AP3S2				SSBP3
		C15orf59				ANO10
		C16orf46				GPN2
		C16orf52				MAP7D1
		C16orf58				CDRT4
		C16orf59				RBM22
		C16orf70				BTBD1
		C16orf78				CTNNA1
		C16orf82				OTUB1
		C16orf86				SCARNA12
		C16orf89				THAP1
		C16orf92				TMEM33
		C16orf95				RFWD3
		C17orf105				ZDHHC4
		C17orf47				RBBP4
		C17orf49				NOB1
		C17orf50				GOLPH3L
		C17orf64				SLC4A1AP
		C17orf67				FNDC3A
		C17orf75				LAMP2
		C17orf77				INO80E
		C17orf97				ABCE1
		C17orf99				SEC61A1
		C18orf15				ALG5
		C18orf21				ALG6
		C18orf8				POMT2
		C19orf18				DPP7
		C19orf24				C1GALT1C1
		C19orf38				RPS27A
		C19orf43				TMEM44
		C19orf52				TRAPPC2
		C19orf53				ATP11C
		C19orf57				ZNF775
		C19orf68				EIF4A1
		C19orf70				CCDC13
		C19orf71				TMED6
		C1orf100				ZNF18
		C1orf101				DHRS13
		C1orf105				SLC43A3
		C1orf111				MVP
		C1orf123				ZNRD1
		C1orf127				FANCE
		C1orf145				JUP
		C1orf159				STK16
		C1orf162				NFYB
		C1orf168				CAPZA2
		C1orf174				POLR2H
		C1orf186				ACOT9
		C1orf194				NPEPPS
		C1orf204				SURF2
		C1orf216				FAM117B
		C1orf226				SLC38A11
		C1orf228				METTL5
		C1orf234				NUP54
		C1orf27				PGM2L1
		C1orf52				SLC39A5
		C1orf61				MEF2A
		C1orf64				IRF9
		C1orf74				PLCD1
		C1QB				TRIM65
		C1QC				TCIRG1
		C1QL1				CDC42BPB
		C1QL2				HYOU1
		C1QTNF1				ATP9A
		C1QTNF3				TSPAN31
		C1QTNF4				RAB11FIP2
		C1QTNF5				ALKBH1
		C1QTNF7				UCHL3
		C1QTNF9				NEDD1
		C1QTNF9B				NFAT5
		C2				EPS15
		C20orf141				DIXDC1
		C20orf144				STT3A
		C20orf166-AS1				NEK2
		C20orf173				MIA3
		C20orf187				MAP4K5
		C20orf194				CTCF
		C20orf196				KHDRBS3
		C20orf197				SLC25A40
		C20orf202				SLC44A1
		C20orf203				FLRT3
		C20orf24				CCDC25
		C20orf85				TRIM27
		C21orf2				RSC1A1
		C21orf62				TAF6L
		C22orf15				IVNS1ABP
		C22orf23				POLR3C
		C22orf24				CCT4
		C22orf31				FBXO42
		C22orf39				KCTD5
		C2CD2				DPM3
		C2CD4B				PYCR1
		C2orf16				RAB43
		C2orf42				IQSEC1
		C2orf50				APOOL
		C2orf54				ARFGEF2
		C2orf57				ZER1
		C2orf61				FOXA2
		C2orf66				ZFAND2B
		C2orf68				RNF10
		C2orf69				CFDP1
		C2orf70				VTI1B
		C2orf72				SEC23B
		C2orf76				SEC23A
		C2orf78				ATP5H
		C2orf80				IPO7
		C2orf82				SLC37A3
		C2orf83				VPS11
		C2orf88				SMARCD2
		C3orf14				MAP3K3
		C3orf20				NAGK
		C3orf22				SMAD2
		C3orf30				POLR2J4
		C3orf33				RNF169
		C3orf35				ZNF395
		C3orf38				HES6
		C3orf49				SSFA2
		C3orf52				MAD2L1BP
		C3orf58				HMGXB4
		C3orf62				ABHD15
		C3P1				LOC728554
		C4BPA				MOGS
		C4orf17				PIK3CA
		C4orf22				HLF
		C4orf36				PEG3
		C4orf45				SKA2
		C4orf46				DNAJC3
		C5AR1				PRKAB1
		C5orf17				FEM1A
		C5orf22				COG1
		C5orf24				COPS8
		C5orf30				XRCC1
		C5orf34				SLC35F5
		C5orf42				TMTC3
		C5orf47				GPBP1L1
		C5orf52				IL17RB
		C5orf64				TRPV1
		C5orf66				MAPK1
		C6				PLEKHA2
		C6orf10				TCEA1
		C6orf106				TMED7
		C6orf118				RFX3
		C6orf15				FAM89B
		C6orf223				AMD1
		C6orf25				PLSCR1
		C6orf52				MRPS12
		C6orf62				NPM3
		C6orf89				ZNF22
		C7orf13				TRAFD1
		C7orf25				ZNF16
		C7orf33				HSPA13
		C7orf34				SKP1
		C7orf50				UBAP2
		C7orf61				CISD1
		C7orf62				RNF5
		C7orf69				PHPT1
		C8B				PPM1A
		C8G				RBPMS
		C8orf17				TRA2A
		C8orf22				ATP5E
		C8orf31				CALM1
		C8orf34				COPS5
		C8orf37				PCSK1N
		C8orf4				SGK3
		C8orf44				RPL31
		C8orf46				KDELR2
		C8orf76				ILVBL
		C8orf88				ATXN10
		C9orf116				CAMK2N1
		C9orf129				TOMM34
		C9orf131				STARD3
		C9orf135				KDELR1
		C9orf135-AS1				SDHAP2
		C9orf139				IL22RA1
		C9orf142				TRIM39
		C9orf163				WDR41
		C9orf24				TYW1
		C9orf3				ASXL2
		C9orf40				PPP1CA
		C9orf43				YWHAE
		C9orf47				SYPL1
		C9orf66				U2AF1
		C9orf72				SNTB2
		CA10				GNL3
		CA12				RASL11A
		CA13				HMG20A
		CA3				LRRC1
		CA4				SFT2D1
		CA5A				SNRK
		CA5B				ZNF511
		CA7				RAP1GDS1
		CA8				SYNJ2BP
		CAB39L				DMTF1
		CABLES2				NUDC
		CABP1				RPP40
		CABP2				PHGDH
		CABP4				TBC1D23
		CABP5				RNF121
		CABS1				RPL32P3
		CACNA1B				LYPLAL1
		CACNA1C				SHKBP1
		CACNA1D				DCAF15
		CACNA1E				ZSWIM1
		CACNA1F				ABHD3
		CACNA1G				AMACR
		CACNA1I				FARP2
		CACNA1S				ABI2
		CACNA2D2				RFNG
		CACNB1				RPN1
		CACNB2				UBTD2
		CACNB3				PTPRA
		CACNG1				MANBAL
		CACNG2				HEATR6
		CACNG3				NSUN3
		CACNG4				PSMD8
		CACNG5				PSMA2
		CACNG6				PKN1
		CACNG7				CDV3
		CACNG8				INCA1
		CACTIN				PPL
		CACUL1				PPAT
		CACYBP				PFKL
		CADM1				PLCG1
		CADM4				PIGC
		CADPS				NUP43
		CADPS2				ATF4
		CALB2				TMEM45B
		CALCA				SCARF2
		CALCOCO2				TRMT2B
		CALCRL				KCTD7
		CALHM1				NSMCE1
		CALM3				ACSL1
		CALML3				ANKRD10
		CALML6				RPL35A
		CALN1				ACSM2B
		CALY				RBM18
		CAMK1G				PTP4A2
		CAMK2A				SPIN3
		CAMKMT				GTPBP8
		CAMKV				RNF34
		CAMSAP1				PHRF1
		CAMTA1				ADAT2
		CAND1				LPP
		CAND2				PIGU
		CANT1				KTI12
		CANX				PIGS
		CAPN11				ZNF548
		CAPN12				HOXA4
		CAPN13				HPN
		CAPN14				IRF1
		CAPN7				STEAP2
		CAPN8				CLPTM1
		CAPN9				SLC25A14
		CAPNS2				SSH2
		CAPRIN1				FKBP3
		CAPS				DGCR6L
		CAPSL				GCLM
		CAPZA1				GNA11
		CAPZA3				GFPT1
		CARD11				KDSR
		CARD16				TP53INP1
		CARD19				CSNK2A1
		CARD6				DOK6
		CARD8				MAP2K7
		CARD9				MFSD8
		CARF				TCTEX1D2
		CARMIL1				TCP11L2
		CARMIL2				ZBTB9
		CARMIL3				FAM3C
		CARNMT1				PRRT2
		CARTPT				TRIM4
		CASC1				CD68
		CASC11				ZCCHC3
		CASC2				TMEM18
		CASC3				ZNF626
		CASC4				BIVM
		CASC9				NME3
		CASD1				PAWR
		CASKIN1				LUZP1
		CASKIN2				ITGB1
		CASP12				PPM1K
		CASP14				KIAA0895L
		CASP2				NCBP1
		CASP6				NDUFA4
		CASP8				MYC
		CASQ2				ZNF579
		CASR				PLEKHA4
		CASS4				MAP3K11
		CASZ1				MSH5
		CATSPER4				MOGAT1
		CATSPERB				DNAJC18
		CATSPERG				ZSCAN4
		CAV1				TNKS1BP1
		CAV2				CD46
		CBARP				SLC25A44
		CBFA2T2				DUSP22
		CBFA2T3				PTAR1
		CBFB				MBP
		CBLB				LRRC58
		CBLL1				LRP1
		CBLN2				MYOM3
		CBLN3				DAXX
		CBR3-AS1				TRMT61A
		CBWD2				EIF2B3
		CBWD5				LAMB2
		CBWD6				HAGH
		CBX2				KPNA3
		CBX3				JUNB
		CBX3P2				ITGB5
		CBX5				ZSCAN29
		CBX6				AMDHD1
		CC2D1B				SBNO2
		CC2D2B				AQR
		CCAR1				SEC14L5
		CCAR2				USP14
		CCAT1				FAM53B
		CCDC102B				USP34
		CCDC105				SEMA4G
		CCDC110				MAML1
		CCDC112				SPOCK2
		CCDC114				SPAST
		CCDC12				ARSG
		CCDC120				WDR47
		CCDC121				METTL14
		CCDC124				RPS15
		CCDC13				DOCK6
		CCDC134				TOX3
		CCDC138				BEND3
		CCDC141				ZNF433
		CCDC142				INTS1
		CCDC144A				FTO
		CCDC144B///CCDC144A				WHAMM
		CCDC144NL-AS1				ISY1
		CCDC149				BTF3
		CCDC151				ZNF324B
		CCDC153				NLN
		CCDC155				CSTF1
		CCDC158				RMI1
		CCDC166				PELI1
		CCDC170				TMEM9B
		CCDC171				TWSG1
		CCDC172				RPS3A
		CCDC174				SIM2
		CCDC179				CHMP1B
		CCDC18-AS1				NDUFAB1
		CCDC180				TUBGCP6
		CCDC181				GALNT1
		CCDC187				PFN1
		CCDC189				RPL18A
		CCDC26				RPL23A
		CCDC27				RPL24
		CCDC3				RPL5
		CCDC30				RPL12
		CCDC34				RPL11
		CCDC36				RPL7A
		CCDC37-AS1				PRDM10
		CCDC38				ABCB1
		CCDC40				COQ3
		CCDC42				USP18
		CCDC57				RALGAPA2
		CCDC60				ZMIZ1
		CCDC62				PNPLA2
		CCDC65				FAM120B
		CCDC66				GCHFR
		CCDC69				FOSL2
		CCDC7				F2RL1
		CCDC71				RNPEP
		CCDC71L				ARID3A
		CCDC73				DHX38
		CCDC8				SNX24
		CCDC81				MRPS18B
		CCDC82				GPT2
		CCDC84				OPLAH
		CCDC88A				AFTPH
		CCDC88B				DYM
		CCDC88C				RNPC3
		CCDC89				CNNM3
		CCDC9				CBL
		CCDC91				ARCN1
		CCDC97				DHX33
		CCER1				GRIPAP1
		CCHCR1				GOLGA5
		CCK				OXSR1
		CCKAR				MRPL22
		CCKBR				THOC1
		CCL1				CCS
		CCL11				CHMP4A
		CCL13				ZC3H7A
		CCL14				ATAD2
		CCL17				CBX6
		CCL18				MED16
		CCL19				ODF3B
		CCL21				ACOT8
		CCL22				EDC3
		CCL23				PAPSS1
		CCL24				RAPGEF2
		CCL26				NCDN
		CCL27				HSPA5
		CCL3				NKTR
		CCL3L3				KCTD21
		CCL4				PUS1
		CCL7				SIK3
		CCM2L				HAGHL
		CCNA2				FLVCR2
		CCNB1				PGAM4
		CCNB2				ZNF318
		CCND3				OPN3
		CCNDBP1				GHDC
		CCNE1				AFF4
		CCNF				SOX13
		CCNJ				CCDC137
		CCNK				FOXD4L4
		CCNT1				AKR1D1
		CCNT2				KCNMB4
		CCNYL1				LMAN1
		CCP110				HLA-B
		CCR1				PARD6B
		CCR10				TUBB6
		CCR2				GTF2B
		CCR3				ATP6AP2
		CCR5				ACTR1B
		CCR8				NAMPT
		CCSAP				PPIF
		CCSER1				USP32
		CCT2				GPC6
		CCT5				PDCD7
		CCT6B				IMMP2L
		CCT8				ETFB
		CD101				CHCHD1
		CD164				EIF1AX
		CD177				EEF1A1
		CD19				AKAP8
		CD1A				PURA
		CD1B				RAMP2
		CD1C				MCEE
		CD1E				PAK4
		CD2				EIF1B
		CD200R1				MRPS31
		CD207				STAM2
		CD209				MBD3
		CD22				DYNC1H1
		CD226				ECH1
		CD247				FRAS1
		CD248				RPF1
		CD276				PRCC
		CD2BP2				CENPT
		CD300C				MAP3K1
		CD300LD				ZC3H10
		CD300LF				MAN1A1
		CD300LG				NAP1L4
		CD302				ABCF1
		CD33				ATP6V1B1
		CD36				AARS
		CD3E				APOA2
		CD3EAP				CASP6
		CD3G				FAM118A
		CD40				LCN15
		CD40LG				EIF3E
		CD44				ADO
		CD46				CASP2
		CD48				DLAT
		CD5				BTBD10
		CD52				SLC25A38
		CD53				SDHAF2
		CD58				SLC31A2
		CD5L				COL6A1
		CD6				GLTPD2
		CD7				PAK1IP1
		CD74				HIF1AN
		CD79B				SLC35A5
		CD80				NBPF1
		CD81				AP1M1
		CD84				MRPS24
		CD86				RPL36AL
		CD8B				RPS4X
		CD93				RPS4Y1
		CD96				TF
		CD99				UGT2B11
		CD99L2				TUBG1
		CD99P1				ACO2
		CDADC1				RPS13
		CDAN1				RPS27
		CDC14B				RPS25
		CDC14C				KBTBD7
		CDC16				SLC7A6OS
		CDC20				NAP1L5
		CDC20B				DNAJC30
		CDC23				UTP23
		CDC37				ELOF1
		CDC37L1				COG8
		CDC40				ACTA1
		CDC42BPA				ANXA5
		CDC42BPB				FOXK1
		CDC42BPG				SPIRE2
		CDC42EP1				CNFN
		CDC45				HOOK3
		CDC5L
		CDC7
		CDC73
		CDCA2
		CDCP1
		CDCP2
		CDH12
		CDH20
		CDH22
		CDH23
		CDH24
		CDH26
		CDH5
		CDH6
		CDH7
		CDH8
		CDH9
		CDHR1
		CDHR3
		CDHR5
		CDIPT
		CDK10
		CDK11B
		CDK13
		CDK15
		CDK16
		CDK19
		CDK20
		CDK3
		CDK5R2
		CDK9
		CDKL2
		CDKL3
		CDKN1B
		CDKN1C
		CDKN2A
		CDKN2A-AS1
		CDKN2AIP
		CDKN2B
		CDO1
		CDON
		CDRT1
		CDRT15
		CDSN
		CDV3
		CDX1
		CDX2
		CDX4
		CEACAM3
		CEACAM4
		CEACAM5
		CEACAM6
		CEACAM7
		CEBPB
		CECR6
		CEL
		CELA1
		CELA2A
		CELA2B
		CELA3B
		CELF1
		CELF2
		CELF4
		CELF5
		CELF6
		CEMIP
		CEND1
		CENPA
		CENPB
		CENPBD1
		CENPBD1P1
		CENPJ
		CENPL
		CENPM
		CENPN
		CENPO
		CENPQ
		CENPU
		CENPVL2
		CEP126
		CEP128
		CEP131
		CEP135
		CEP152
		CEP162
		CEP170B
		CEP192
		CEP290
		CEP295
		CEP295NL
		CEP41
		CEP44
		CEP57
		CEP57L1
		CEP68
		CEP70
		CEP76
		CEP78
		CEP83-AS1
		CEP85L
		CEP89
		CEP97
		CER1
		CERS2
		CES1P1
		CES3
		CES5A
		CETN1
		CETP
		CFAP100
		CFAP161
		CFAP20
		CFAP36
		CFAP43
		CFAP44
		CFAP46
		CFAP47
		CFAP53
		CFAP61
		CFAP65
		CFAP69
		CFAP70
		CFAP74
		CFAP97
		CFC1
		CFHR1
		CFHR2
		CFHR4
		CFLAR
		CFTR
		CGA
		CGB1
		CGB2
		CGN
		CGNL1
		CGRRF1
		CH17-340M24.3
		CH25H
		CHAD
		CHAMP1
		CHAT
		CHCHD1
		CHCHD2
		CHCHD5
		CHD1L
		CHD2
		CHD5
		CHD6
		CHD8
		CHD9
		CHEK1
		CHERP
		CHI3L1
		CHIA
		CHIAP2
		CHIT1
		CHKA
		CHL1-AS1
		CHML
		CHMP2A
		CHMP4B
		CHMP4C
		CHMP5
		CHMP7
		CHN2
		CHORDC1
		CHP2
		CHPF
		CHRAC1
		CHRD
		CHRDL1
		CHRDL2
		CHRM2
		CHRM3
		CHRM4
		CHRM5
		CHRNA1
		CHRNA2
		CHRNA3
		CHRNA5
		CHRNA6
		CHRNB1
		CHRNB2
		CHRNB3
		CHRNB4
		CHRND
		CHST1
		CHST12
		CHST15
		CHST5
		CHST8
		CHST9
		CHSY3
		CHTF8
		CHUK
		CHURC1
		CIAO1
		CIB1
		CIB4
		CIDEA
		CIDEC
		CIDECP
		CIITA
		CINP
		CISD2
		CISD3
		CIT
		CIZ1
		CKLF
		CKLF-CMTM1
		CKMT2
		CKMT2-AS1
		CKS1B
		CLASP1
		CLASP2
		CLC
		CLCA1
		CLCA3P
		CLCA4
		CLCC1
		CLCN1
		CLCN3
		CLCN5
		CLCN6
		CLCNKB
		CLDN11
		CLDN12
		CLDN16
		CLDN17
		CLDN18
		CLDN19
		CLDN2
		CLDN22
		CLDN23
		CLDN4
		CLDN5
		CLDN6
		CLDN8
		CLDN9
		CLDND2
		CLEC10A
		CLEC12A
		CLEC1B
		CLEC2D
		CLEC3A
		CLEC3B
		CLEC4A
		CLEC4C
		CLEC4F
		CLEC4G
		CLEC4M
		CLEC5A
		CLEC7A
		CLECL1
		CLHC1
		CLIC2
		CLIC5
		CLIC6
		CLIP1
		CLIP1-AS1
		CLIP2
		CLIP3
		CLIP4
		CLK2
		CLK3
		CLMP
		CLOCK
		CLP1
		CLPP
		CLPTM1
		CLRN1
		CLTA
		CLTC
		CLU
		CLUL1
		CLVS1
		CMA1
		CMAHP
		CMKLR1
		CMTM5
		CMTM7
		CMTR2
		CMYA5
		CNBD2
		CNBP
		CNDP1
		CNDP2
		CNGB1
		CNGB3
		CNIH4
		CNKSR2
		CNN1
		CNNM1
		CNNM2
		CNOT11
		CNOT2
		CNOT4
		CNOT6L
		CNOT7
		CNOT8
		CNOT9
		CNP
		CNPY2
		CNPY3
		CNR1
		CNR2
		CNST
		CNTD1
		CNTD2
		CNTF
		CNTFR-AS1
		CNTLN
		CNTN2
		CNTN3
		CNTN4
		CNTNAP2
		CNTNAP3
		CNTNAP4
		CNTNAP5
		CNTRL
		COA3
		COA4
		COBLL1
		COCH
		COG1
		COG2
		COG3
		COL11A1
		COL12A1
		COL14A1
		COL15A1
		COL17A1
		COL1A2
		COL20A1
		COL23A1
		COL24A1
		COL25A1
		COL26A1
		COL27A1
		COL3A1
		COL4A3BP
		COL5A2
		COL6A1
		COL6A2
		COL6A3
		COL6A5
		COL6A6
		COL9A1
		COL9A2
		COLEC10
		COLEC11
		COLGALT1
		COLGALT2
		COLQ
		COMMD10
		COMMD8
		COMMD9
		COMP
		COMT
		COMT///ARVCF
		COPE
		COPG2
		COPRS
		COPS4
		COPS6
		COPS7B
		COPS9
		COPZ1
		COQ4
		COQ7
		COQ9
		CORIN
		CORO1C
		CORT
		COTL1
		COX11
		COX18
		COX19
		COX4I2
		COX6A1
		COX6B2
		COX7A1
		COX7A2
		COX7B2
		COX8A
		CP
		CPA1
		CPA2
		CPA3
		CPEB2
		CPEB3
		CPLX2
		CPLX3
		CPN1
		CPN2
		CPNE1
		CPNE4
		CPNE6
		CPNE7
		CPNE9
		CPO
		CPS1-IT1
		CPSF1
		CPSF2
		CPSF3L
		CPTP
		CPXCR1
		CPXM1
		CPXM2
		CR1
		CR2
		CRABP1
		CRACR2A
		CRAMP1
		CRAT
		CRB1
		CRBN
		CRCP
		CREB1
		CREBBP
		CREBL2
		CREG2
		CRELD2
		CRH
		CRHBP
		CRHR1
		CRHR1-IT1
		CRHR2
		CRIP3
		CRIPT
		CRISP2
		CRISPLD1
		CRISPLD2
		CRK
		CRKL
		CRLF2
		CRLF3
		CRMP1
		CRNKL1
		CRNN
		CROCC
		CROCCP3
		CRTAC1
		CRTAP
		CRTC1
		CRTC3
		CRX
		CRY2
		CRYAA
		CRYBB1
		CRYBB2P1
		CRYBB3
		CRYBG3
		CRYGA
		CRYGB
		CRYGD
		CRYGN
		CRYGS
		CRYM
		CRYZ
		CRYZL1
		CSAG4
		CSDC2
		CSDE1
		CSF1
		CSF2RB
		CSF3R
		CSH1
		CSH2
		CSHL1
		CSK
		CSMD1
		CSMD2
		CSN1S1
		CSN1S2AP
		CSN2
		CSN3
		CSNK1E
		CSNK1G2
		CSNK2B
		CSPG4
		CSPG4P1Y
		CSPG4P5
		CSPG5
		CSPP1
		CSRP3
		CST1
		CST2
		CST3
		CST5
		CST9
		CSTF2
		CSTF2T
		CSTL1
		CT45A1
		CT47A11
		CT47B1
		CT83
		CTAG1A
		CTAG2
		CTAGE1
		CTAGE10P
		CTBP1
		CTBP2
		CTDP1
		CTDSP1
		CTDSP2
		CTDSPL2
		CTF1
		CTH
		CTHRC1
		CTLA4
		CTNNA1
		CTNNA2
		CTNNBIP1
		CTNNBL1
		CTNND1
		CTNND2
		CTRB1
		CTSA
		CTSC
		CTSE
		CTSK
		CTSO
		CTSW
		CTTN
		CTXN1
		CTXN3
		CUBN
		CUEDC1
		CUL2
		CUL3
		CUL4A
		CUL9
		CUX1
		CUZD1
		CWC15
		CWF19L1
		CWH43
		CX3CL1
		CXCL10
		CXCL11
		CXCL12
		CXCL13
		CXCL17
		CXCL3
		CXCL6
		CXCL9
		CXCR1
		CXCR2
		CXCR2P1
		CXCR5
		CXCR6
		CXorf21
		CXorf23
		CXorf36
		CXorf38
		CXorf40B
		CXorf51A
		CXorf56
		CXorf57
		CXorf58
		CXorf65
		CXXC4
		CYB561
		CYB5B
		CYB5D2
		CYB5R1
		CYB5RL
		CYBA
		CYBRD1
		CYFIP1
		CYP11B1
		CYP19A1
		CYP1A1
		CYP1A2
		CYP1B1-AS1
		CYP21A2
		CYP24A1
		CYP26A1
		CYP27A1
		CYP2A7
		CYP2B7P
		CYP2C19
		CYP2C8
		CYP2C9
		CYP2D6
		CYP2E1
		CYP2J2
		CYP2R1
		CYP2S1
		CYP2U1
		CYP2W1
		CYP3A4
		CYP3A43
		CYP46A1
		CYP4A11
		CYP4F11
		CYP4F2
		CYP4F22
		CYP4F29P
		CYP4F3
		CYP4F30P
		CYP4V2
[truncated: 7,688 more rows]
