# Supplementary material
Source: publisher figshare collection journal article supplement (https://tandf.figshare.com/articles/dataset/_/11369025)
Supplement: Supplementary file 1 [file 1 › Supplementary Table 5.xlsx]

## Sheet: Feuil1
Welch Two Sample t-test
MCF7 treated with IL6
genomic feature	mean DNA methylation (beta-value)
	unaffected	upregulated	p-value	t
TSS ±1kb	0.207804	0.429795	< 2.2E-16	-22.627
Cgi	0.117266	0.356443	< 2.2E-16	-19.002
Shore	0.284405	0.454528	7.109e-15	-8.1877
Shelf	0.479168	0.755669	3.118e-12	-8.16
NA	0.485808	0.584477	1.054e-05	-4.4812
MCF7 treated with IL1b
genomic feature	mean DNA methylation (beta-value)
	unaffected	upregulated	p-value	t
TSS ±1kb	0.166993	0.25147	< 2.2E-16	-16.2
Cgi	0.0987049	0.141512	< 2.2E-16	-9.4347
Shore	0.262826	0.35508	1.653e-14	-7.8175
Shelf	0.526701	0.368264	0.0002155	3.8204
NA	0.485808	0.551806	< 2.2E-16	-12.899
MCF7 treated with TNFa
genomic feature	mean DNA methylation (beta-value)
	unaffected	upregulated	p-value	t
TSS ±1kb	0.169315	0.26583	< 2.2E-16	-39.795
Cgi	0.0973015	0.12476	< 2.2E-16	-14.24
Shore	0.260743	0.317095	1.653e-14	-11.772
Shelf	0.527293	0.814893	< 2.2E-16	-11.965
NA	0.39222	0.658508	< 2.2E-16	-35.387
MCF7 treated with IGF
genomic feature	mean DNA methylation (beta-value)
	unaffected	upregulated	p-value	t
TSS ±1kb	0.192805	0.161435	< 2.2E-16	8.6787
Cgi	0.108898	0.0919661	2.952e-09	5.9471
Shore	0.279336	0.244214	8.085e-06	4.476
Shelf	0.466229	0.613887	0.004721	-2.927
NA	0.455684	0.454949	0.9742	0.032411
