# Supplementary material
Source: publisher figshare collection journal article supplement (https://tandf.figshare.com/articles/dataset/_/11369025)
Supplement: Supplementary file 1 [file 1 › Supplementary Table 6 .pdf]

|                                                                                                                                   |                  |                     |                  |                  |  |
|-----------------------------------------------------------------------------------------------------------------------------------|------------------|---------------------|------------------|------------------|--|
| Mean DNA methylation level at shore sequences of FC2 genes in breast tumors classified in quantiles according their stromal-score |                  |                     |                  |                  |  |
| Mann Whitney test                                                                                                                 | q2               | q3                  | q4               | q5               |  |
| Column B                                                                                                                          | vs.              | vs.                 | vs.              | vs.              |  |
| vs.                                                                                                                               | q1               | q1                  | q1               | q1               |  |
| Column A                                                                                                                          |                  |                     |                  |                  |  |
| Mann Whitney test                                                                                                                 | 0.0513           | 0.1146              | 0.4722           | 0.872            |  |
| P value                                                                                                                           | ns               | ns                  | ns               | ns               |  |
| P value summary                                                                                                                   | No               | No                  | No               | No               |  |
| Significantly different? (P < 0.05)                                                                                               | Two-tailed       | Two-tailed          | Two-tailed       | Two-tailed       |  |
| One- or two-tailed P value?                                                                                                       | 22494 , 25401    | 22785.50 , 25109.50 | 23460 , 24435    | 23898 , 23997    |  |
| Sum of ranks in column A,B                                                                                                        | 10404            | 10695.5             | 11370            | 11808            |  |
| Mann-Whitney U                                                                                                                    |                  |                     |                  |                  |  |
| Difference between medians                                                                                                        | 0.3685529, n=155 | 0.3685529, n=155    | 0.3685529, n=155 | 0.3685529, n=155 |  |
| Median of column A                                                                                                                | 0.3931922, n=154 | 0.3838548, n=154    | 0.3738627, n=154 | 0.3641153, n=154 |  |
| Median of column B                                                                                                                | 0.02463935       | 0.01530191          | 0.00530982       | -0.004437596     |  |
| Difference: Actual                                                                                                                |                  |                     |                  |                  |  |
| Mean expression level (FPKM) of FC2 genes in breast tumors classified in quantiles according their stromal-score                  |                  |                     |                  |                  |  |
| Mann Whitney test                                                                                                                 | q2               | q3                  | q4               | q5               |  |
| Column A                                                                                                                          | vs.              | vs.                 | vs.              | vs.              |  |
| Column B                                                                                                                          | q1               | q1                  | q1               | q1               |  |
| P value                                                                                                                           | 0.0385           | 0.0002              | < 0.0001         | < 0.0001         |  |
| P value summary                                                                                                                   | *                | ***                 | ****             | ****             |  |
| Significantly different? (P < 0.05)                                                                                               | Yes              | Yes                 | Yes              | Yes              |  |
| One- or two-tailed P value?                                                                                                       | Two-tailed       | Two-tailed          | Two-tailed       | Two-tailed       |  |
| Sum of ranks in column A,B                                                                                                        | 22399 , 25496    | 21123 , 26772       | 19610 , 28285    | 18752 , 29143    |  |
| Mann-Whitney U                                                                                                                    | 10309            | 9033                | 7520             | 6662             |  |
| Difference between medians                                                                                                        |                  |                     |                  |                  |  |
| Median of column A                                                                                                                | 525.4927, n=155  | 525.4927, n=155     | 525.4927, n=155  | 525.4927, n=155  |  |
| Median of column B                                                                                                                | 583.8909, n=154  | 627.6683, n=154     | 662.0682, n=154  | 734.1863, n=154  |  |
| Difference: Actual                                                                                                                | 58.39819         | 102.1757            | 136.5755         | 208.6936         |  |

Supplementary.Table 6 DNA methylation and gene expression versus stromal-score
