# Supplementary material
Source: publisher figshare collection journal article supplement (https://tandf.figshare.com/articles/dataset/_/11369025)
Supplement: Supplementary file 1 [file 1 › Supplementary Table 7.pdf]

| Motif                      | Logo                                                                                | 3 Top hits in databases                                                                                                                                                                                                                                                  |
|----------------------------|-------------------------------------------------------------------------------------|--------------------------------------------------------------------------------------------------------------------------------------------------------------------------------------------------------------------------------------------------------------------------|
| oligos_6nt_test_vs_ctrl_m1 | 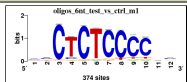   | <u>versus HT Methyl Selex</u> : ZNF444_methyl,<br><u>versus HT Selex</u> : ZNF281, ZNF444,<br><u>versus Homer</u> : homer_160_Maz,<br><u>versus jasper core nonredundant vertebrates</u> : MZF1,                                                                         |
| oligos_6nt_test_vs_ctrl_m2 | 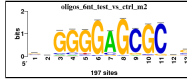   | <u>versus HT Methyl Selex</u> : E2F2_methyl, ZNF263_methyl,<br><u>versus HT Selex</u> : ZNF263,<br><u>versus Homer</u> : no match<br><u>versus jasper core nonredundant vertebrates</u> : MZF1,                                                                          |
| oligos_6nt_test_vs_ctrl_m3 | 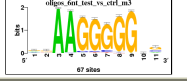   | <u>versus HT Methyl Selex</u> : KLF15_methyl, SP2_methyl, ZNF281_methyl,<br><u>versus HT Selex</u> : KLF15, SP8,<br><u>versus Homer</u> : homer_160_Maz, homer_314_ZNF165, homer_145_KLF14,<br><u>versus jasper core nonredundant vertebrates</u> : INSM1, CTCFL, KLF13, |
| oligos_6nt_test_vs_ctrl_m4 | 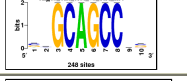   | <u>versus HT Methyl Selex</u> : KLF3_methyl,<br><u>versus HT Selex</u> : no match<br><u>versus Homer</u> : no match<br><u>versus jasper core nonredundant vertebrates</u> : no match                                                                                     |
| oligos_6nt_test_vs_ctrl_m5 | 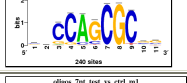   | <u>versus HT Methyl Selex</u> : no match<br><u>versus HT Selex</u> : no match<br><u>versus Homer</u> : no match<br><u>versus jasper core nonredundant vertebrates</u> : no match                                                                                         |
| oligos_7nt_test_vs_ctrl_m1 | 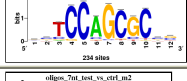  | <u>versus HT Methyl Selex</u> : no match<br><u>versus HT Selex</u> : no match<br><u>versus Homer</u> : no match<br><u>versus jasper core nonredundant vertebrates</u> : no match                                                                                         |
| oligos_7nt_test_vs_ctrl_m2 | 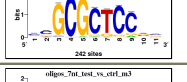 | <u>versus HT Methyl Selex</u> : E2F2_methyl, TCFL5_methyl,<br><u>versus HT Selex</u> : TCFL5, E2F2,<br><u>versus Homer</u> : no match<br><u>versus jasper core nonredundant vertebrates</u> : no match                                                                   |
| oligos_7nt_test_vs_ctrl_m3 | 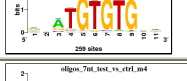 | <u>versus HT Methyl Selex</u> : TBX1_methyl, HES5_methyl, FOXO3_methyl,<br><u>versus HT Selex</u> : TBX2, TBX15, FOXO3,<br><u>versus Homer</u> : homer_62_Egr1,<br><u>versus jasper core nonredundant vertebrates</u> : TBX1,                                            |
| oligos_7nt_test_vs_ctrl_m4 | 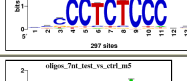 | <u>versus HT Methyl Selex</u> : ZNF444_methyl,<br><u>versus HT Selex</u> : ZNF281, ZNF444,<br><u>versus Homer</u> : no match<br><u>versus jasper core nonredundant vertebrates</u> : KLF5, MZF1,                                                                         |
| oligos_7nt_test_vs_ctrl_m5 | 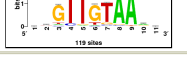 | <u>versus HT Methyl Selex</u> : FOXJ2_methyl,<br><u>versus HT Selex</u> : CDX2, FOXJ2,<br><u>versus Homer</u> : homer_96_Foxo3,<br><u>versus jasper core nonredundant vertebrates</u> : FOXI1, FOXP3, FOXO4,                                                             |

Supplementary Table7-transcription factors potential binding sites at FC2 genes
