# Supplementary material
Source: publisher figshare collection journal article supplement (https://tandf.figshare.com/articles/dataset/_/11369025)

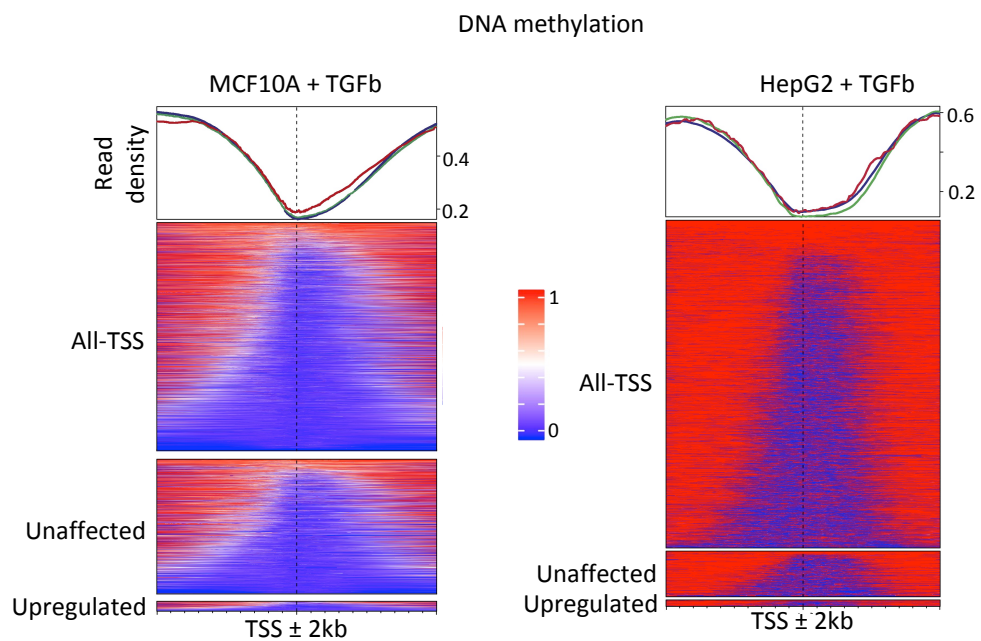

Supplementary.Figure 1

Supplement: Supplementary file 1 [file 1 › Supplementary Figure 1.pdf]

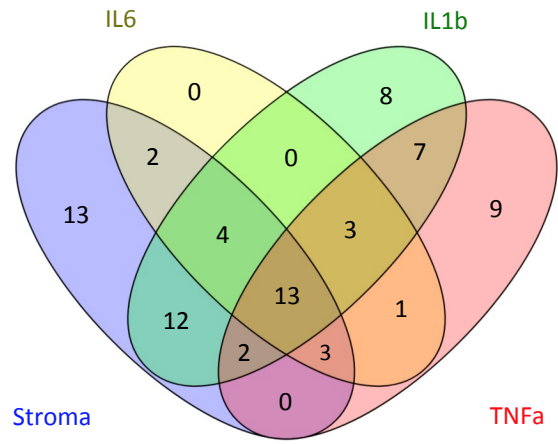

Supplemantary.Figure.2

Supplement: Supplementary file 1 [file 1 › Supplementary Figure 2.pdf]

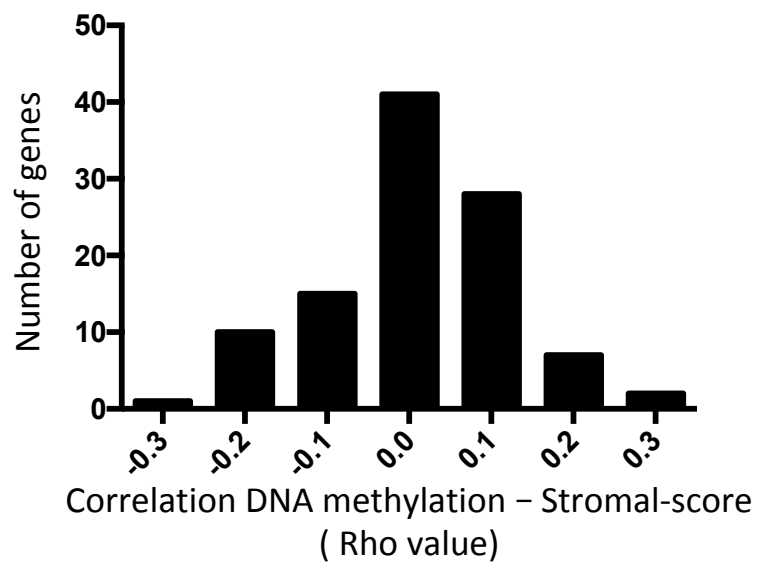

Supplementary.Figure.4

Supplement: Supplementary file 1 [file 1 › Supplementary Figure 4.pdf]
